# Supplementary material for: CuBr2-mediated dehydrogenative [4+2] annulation of 1-naphthyl-1,3-indandiones and alkenes
Source: Royal Society of Chemistry journal article supplement (doi:10.1039/d4cc02386b), 2024-01-01

# CuBr<sub>2</sub>-Mediated Dehydrogenative [4 + 2] Annulation of 1-Naphthyl-1,3-indandiones and Alkenes

## Table of Contents

|                                                                                                   |       |
|---------------------------------------------------------------------------------------------------|-------|
| General methods and materials.....                                                                | 2     |
| Screening of Reaction Conditions.....                                                             | 3-4   |
| General catalytic procedure for [4 + 2] annulation of 1-naphthyl-1,3-indandiones and alkenes..... | 5     |
| Procedure gram-scale for the synthesis of 3a.....                                                 | 6     |
| Mechanistic study.....                                                                            | 7-8   |
| Characterization data for the products.....                                                       | 9-24  |
| Copies of <sup>1</sup> H and <sup>13</sup> C NMR spectra of products.....                         | 25-60 |

## General Methods and Materials

CuBr<sub>2</sub>, CuBr, CuBr.SMe<sub>2</sub>, CuCl<sub>2</sub>, CuCl, CuI, Cu(OAc)<sub>2</sub>, Cu(acac)<sub>2</sub>, Cu(OTf)<sub>2</sub>, CuOTf, Cu(TFA)<sub>2</sub>, CuBr, Cs<sub>2</sub>CO<sub>3</sub>, NaOCH<sub>3</sub>, KO<sup>t</sup>Bu, NaO<sup>t</sup>Bu, and LiO<sup>t</sup>Bu were purchased from Energy Chemical and used without further purification. Other chemicals were purchased from commercial suppliers, further dried and purified if necessary. The water used was re-distilled and ion-free. <sup>1</sup>H and <sup>13</sup>C NMR spectra were achieved on a Bruker AVANCE 400 MHz spectrometer (<sup>1</sup>H 400 MHz; <sup>13</sup>C 100 MHz) in CDCl<sub>3</sub>. Abbreviations for data quoted are *s*-singlet; *brs*-broad singlet; *d*-doublet; *t*-triplet; *dd*-doublet of doublets; *m*-multiplet. High-resolution mass spectra were measured on a Waters Micromass GCT facility. Thin-layer chromatographies were done on pre-coated silica gel 60F254 plates (Merck). Silica gel 60H (200-300 mesh) manufactured by Qingdao Haiyang Chemical Group Co. (China) was used for general chromatography.

## Screening of Reaction Conditions<sup>a</sup>

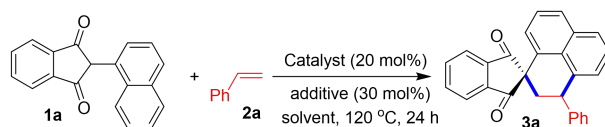

| entry           | catalyst              | additive                        | solvent            | yield (%) <sup>b</sup> |
|-----------------|-----------------------|---------------------------------|--------------------|------------------------|
| 1               | CuBr                  | K <sub>2</sub> CO <sub>3</sub>  | toluene            | 14                     |
| 2               | CuBr <sub>2</sub>     | K <sub>2</sub> CO <sub>3</sub>  | toluene            | 21                     |
| 3               | CuBr.SMe <sub>2</sub> | K <sub>2</sub> CO <sub>3</sub>  | toluene            | trace                  |
| 4               | CuCl <sub>2</sub>     | K <sub>2</sub> CO <sub>3</sub>  | toluene            | 14                     |
| 5               | CuCl                  | K <sub>2</sub> CO <sub>3</sub>  | toluene            | <5                     |
| 6               | CuI                   | K <sub>2</sub> CO <sub>3</sub>  | toluene            | trace                  |
| 7               | Cu(OAc) <sub>2</sub>  | K <sub>2</sub> CO <sub>3</sub>  | toluene            | 0                      |
| 8               | Cu(acac) <sub>2</sub> | K <sub>2</sub> CO <sub>3</sub>  | toluene            | 0                      |
| 9               | Cu(OTf) <sub>2</sub>  | K <sub>2</sub> CO <sub>3</sub>  | toluene            | 0                      |
| 10              | CuOTf                 | K <sub>2</sub> CO <sub>3</sub>  | toluene            | 0                      |
| 11              | Cu(TFA) <sub>2</sub>  | K <sub>2</sub> CO <sub>3</sub>  | toluene            | 0                      |
| 12              | CuBr <sub>2</sub>     | Cs <sub>2</sub> CO <sub>3</sub> | toluene            | 0                      |
| 13              | CuBr <sub>2</sub>     | NaOCH <sub>3</sub>              | toluene            | 0                      |
| 14              | CuBr <sub>2</sub>     | KO <sup>t</sup> Bu              | toluene            | 43                     |
| 15              | CuBr <sub>2</sub>     | LiO <sup>t</sup> Bu             | toluene            | 0                      |
| 16              | CuBr <sub>2</sub>     | NaO <sup>t</sup> Bu             | toluene            | 78                     |
| 17              | CuBr <sub>2</sub>     | NaO <sup>t</sup> Bu             | DMSO               | 0                      |
| 18              | CuBr <sub>2</sub>     | NaO <sup>t</sup> Bu             | DMF                | 0                      |
| 19              | CuBr <sub>2</sub>     | NaO <sup>t</sup> Bu             | MeOH               | 24                     |
| 20              | CuBr <sub>2</sub>     | NaO <sup>t</sup> Bu             | THF                | 17                     |
| 21              | CuBr <sub>2</sub>     | NaO <sup>t</sup> Bu             | 1,4-dioxane        | 0                      |
| 22              | CuBr <sub>2</sub>     | NaO <sup>t</sup> Bu             | DCE                | 0                      |
| 23              | CuBr <sub>2</sub>     | NaO <sup>t</sup> Bu             | CH <sub>3</sub> CN | 0                      |
| 24 <sup>c</sup> | CuBr <sub>2</sub>     | NaO <sup>t</sup> Bu             | toluene            | trace                  |
| 25 <sup>d</sup> |                       | NaO <sup>t</sup> Bu             | toluene            | trace                  |
| 26 <sup>e</sup> | CuBr <sub>2</sub>     |                                 | toluene            | trace                  |

<sup>a</sup>Reaction conditions: 1-naphthyl-1,3-indandione **1a** (0.2 mmol), styrene **2a** (0.3 mmol), catalyst (20.0 mol%), additive (30.0 mol%), solvent (3 mL), 120 °C, 24 h, reaction under air; <sup>b</sup> Isolated yield after chromatography; <sup>c</sup> Reaction carried out in 1.0 equiv of NaO<sup>t</sup>Bu; <sup>d</sup> Reaction carried out in the absence of CuBr<sub>2</sub>; <sup>e</sup> Reaction carried out in the absence of NaO<sup>t</sup>Bu.

To examine the possibility of our proposed [4 + 2] cycloaddition for the formation of desired spirocyclic product **3a**, we commenced our investigations on the reaction of 1-naphthyl-1,3-indandione (**1a**) with styrene (**2a**), using CuBr (20 mol %) as the catalyst, and K<sub>2</sub>CO<sub>3</sub> (30 mol %) as the base under air in toluene at 120 °C for 24 h. To our delight, the reaction proceeded smoothly and the desired cycloaddition product 3'-phenyl-2',3'-dihydrospiro[indene-2,1'-phenalene]-1,3-dione (**3a**) was observed in a 14% yield (Table 1, entry 1). Based on this finding, a variety of copper catalysts were examined, and the CuBr<sub>2</sub> was found to be the best choice (entries 2-11). Regarding additives (entries 12-16), NaO<sup>t</sup>Bu gave the highest yield (78%). Then, several solvents including DMSO, DMF, MeOH, THF, 1,4-dioxane, DCE, and CH<sub>3</sub>CN were tested, and toluene proved to be the most appropriate solvent for this conversion (entries 17-23). The reaction obviously reduced yield or completely inhibited in the absence of either CuBr<sub>2</sub> or NaO<sup>t</sup>Bu, indicating that CuBr<sub>2</sub>/NaO<sup>t</sup>Bu co-catalytic system was essential for the reaction outcome (entries 25-26).

## General Catalytic Procedure for [4 + 2] Annulation of 1-Naphthyl-1,3-indandiones and Alkenes

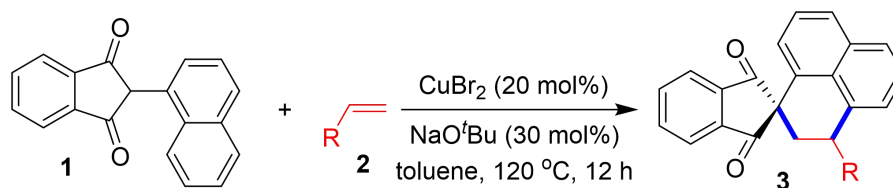

A reaction flask (25 mL) was charged with 1-naphthyl-1,3-indandione **1** (0.2 mmol, 1.0 equiv), alkene **2** (0.3 mmol, 1.5 equiv), CuBr<sub>2</sub> (8.9 mg, 20 mol%), NaO<sup>t</sup>Bu (5.8 mg, 30 mol%), then the toluene 3 mL was added. The mixture was stirred at 120 °C in the oil bath for 12 hours under an atmosphere of air. After the reaction finished, the resulted mixtures were diluted with 20 mL of dichloromethane and washed with 20 mL of H<sub>2</sub>O. The aqueous layer was extracted twice with dichloromethane (10 mL) and the combined organic phase was dried over Na<sub>2</sub>SO<sub>4</sub>. After evaporation of the solvents, the residue was purified by silica gel chromatography (hexane/AcOEt = 20 : 1) to yield product.

## Procedure Gram-scale for the Synthesis of **3a**

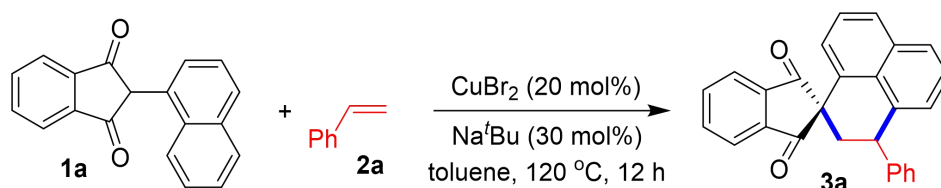

To a dry thick walled pressure resistant tube (250 mL) was charged with 1-naphthyl-1,3-indandione **1a** (5 mmol, 1.0 equiv), styrene **2a** (7.5 mmol, 1.5 equiv),  $\text{CuBr}_2$  (223.0 mg, 20 mol%),  $\text{NaO}^t\text{Bu}$  (145.0 mg, 30 mol%), then the toluene 75 mL was added. The tube was closed with a PTFE thread sealing cap. The mixture was stirred at 120 °C in oil bath for 12 hours under an atmosphere of air. After the reaction finished, the resulted mixtures were diluted with 50 mL of dichloromethane and washed with 100 mL of  $\text{H}_2\text{O}$ . The aqueous layer was extracted twice with dichloromethane (30 mL) and the combined organic phase was dried over  $\text{Na}_2\text{SO}_4$ . After evaporation of the solvents, the residue was purified by silica gel chromatography (hexane/ $\text{AcOEt}$  = 20 : 1) to yield product **3a** (61% yield, 1140.7 mg).

## Mechanistic Study

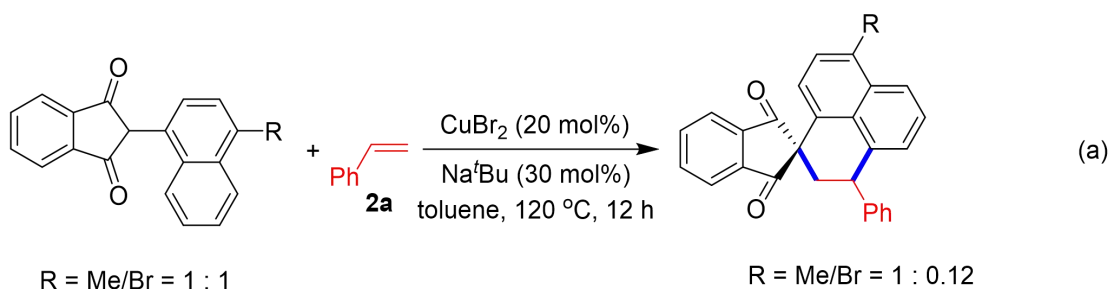

To a dry thick walled pressure resistant tube (25 mL) was charged with 2-(4-methylnaphthalen-1-yl)-1*H*-indene-1,3(2*H*)-dione (0.1 mmol, 1.0 equiv), 2-(4-bromonaphthalen-1-yl)-1*H*-indene-1,3(2*H*)-dione (0.1 mmol, 1.0 equiv), styrene (0.3 mmol, 1.5 equiv), CuBr<sub>2</sub> (8.9 mg, 20 mol%), NaO<sup>t</sup>Bu (5.8 mg, 30 mol%), then the toluene 3 mL was added. The mixture was stirred at 120 °C in the oil bath for 12 hours under an atmosphere of air. After the reaction finished, the resulted mixtures were diluted with 20 mL of dichloromethane and washed with 20 mL of H<sub>2</sub>O. The aqueous layer was extracted twice with dichloromethane (10 mL) and the combined organic phase was dried over Na<sub>2</sub>SO<sub>4</sub>. After evaporation of the solvents, the residue was purified by silica gel chromatography (hexane/AcOEt = 20 : 1) to yield product.

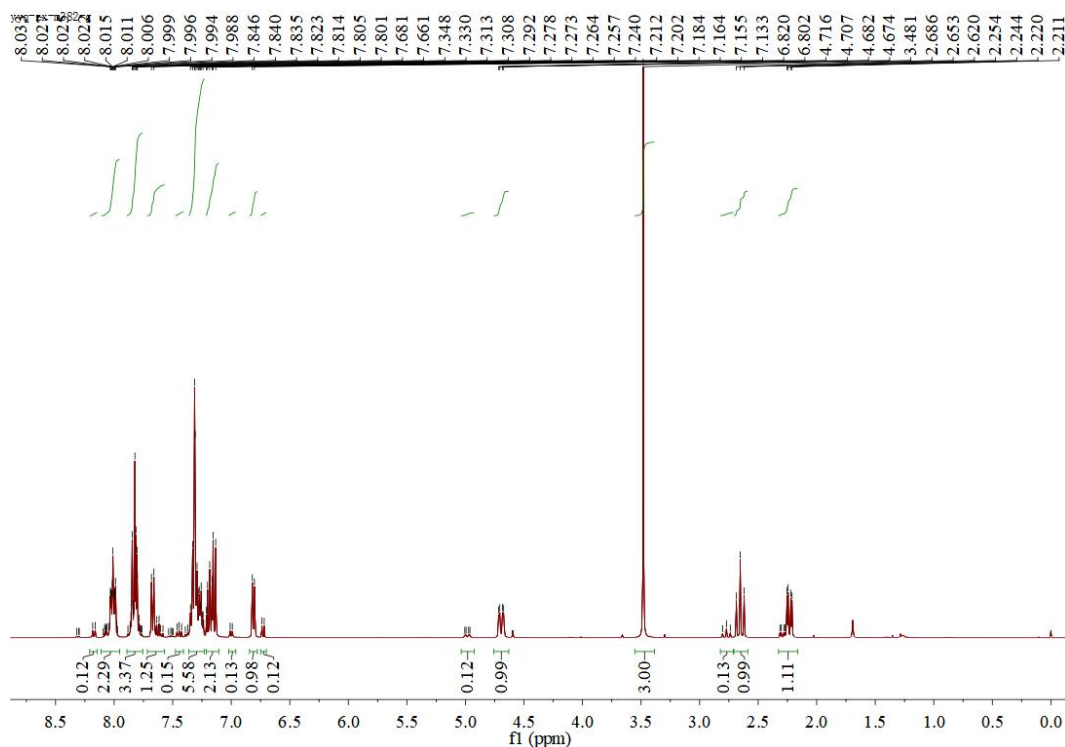

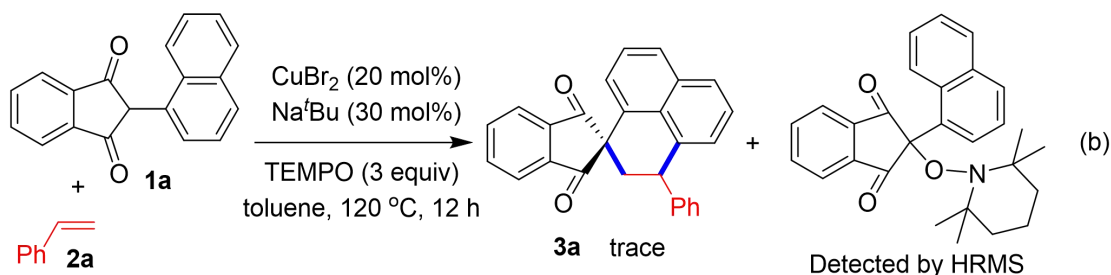

HRMS (ESI, m/z) calcd. for  $\text{C}_{28}\text{H}_{30}\text{NO}_3$   $[\text{M}+\text{H}]^+$  428.2221, found 428.2223

To a dry thick walled pressure resistant tube (25 mL) was charged with 1-naphthyl-1,3-indandione **1a** (0.2 mmol, 1.0 equiv), styrene **2a** (0.3 mmol, 1.5 equiv),  $\text{CuBr}$  (8.9 mg, 20 mol%),  $\text{NaO}^t\text{Bu}$  (5.8 mg, 30 mol%), TEMPO (0.6 mmol, 93.6 mg), then the toluene 3 mL was added. The mixture was stirred at 120 °C in the oil bath for 12 hours under an atmosphere of air. After the reaction finished, the resulted mixtures were diluted with 20 mL of dichloromethane and washed with 20 mL of  $\text{H}_2\text{O}$ . The aqueous layer was extracted twice with dichloromethane (10 mL) and the combined organic phase was dried over  $\text{Na}_2\text{SO}_4$ . After evaporation of the solvents, the residue was purified by silica gel chromatography (hexane/ $\text{AcOEt}$  = 20 : 1) to yield product.

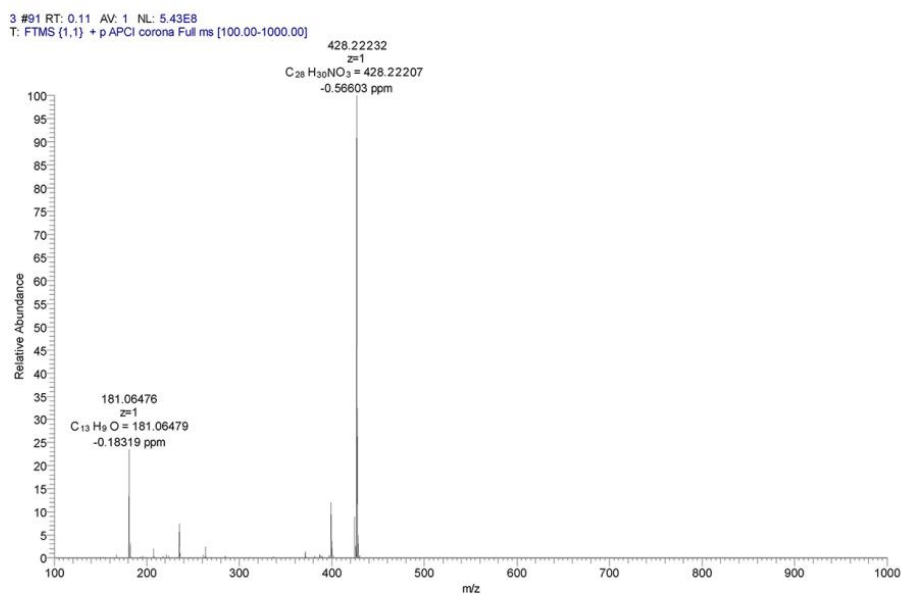



## Characterization data for the products

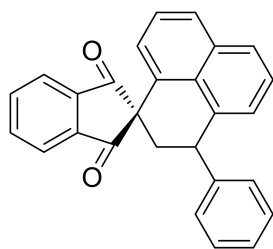

3'-Phenyl-2',3'-dihydrospiro[indene-2,1'-phenalene]-1,3-dione

**(3a)**: Obtained as a pale yellow liquid (58.3 mg, 78% yield), eluting with 5% EtOAc in PE (elution gradient);  $^1\text{H NMR}$  (400 MHz,  $\text{CDCl}_3$ )  $\delta$  8.11 (d,  $J = 5.6$  Hz, 1H), 8.05 (d,  $J = 4.4$  Hz, 1H), 7.87 - 7.89 (m, 2H), 7.80 (d,  $J = 8.4$  Hz, 1H), 7.83 (d,  $J = 8.0$  Hz, 1H), 7.29 - 7.36 (m, 7H), 6.93 (d,  $J = 7.2$  Hz, 1H), 6.88 (d,  $J = 6.8$  Hz, 1H), 5.00 - 5.04 (m, 1H), 2.76 - 2.83 (t, 1H), 2.27 - 2.31 (q, 1H);  $^{13}\text{C NMR}$  (101 MHz,  $\text{CDCl}_3$ )  $\delta$  203.4, 200.3, 144.0, 142.1, 141.1, 138.1, 136.3, 136.0, 133.8, 131.1, 130.0, 129.1, 128.7, 128.5, 126.9, 126.8, 125.8, 125.7, 125.0, 124.6, 124.2, 123.6, 58.8, 41.8, 36.6; HRMS (ESI-TOF)  $m/z$  calcd for  $\text{C}_{27}\text{H}_{19}\text{O}_2$   $[\text{M} + \text{H}]^+$  375.1380, found 375.1378.

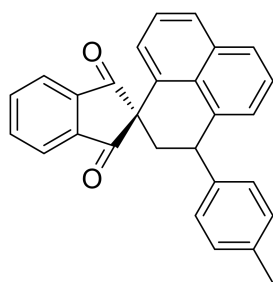

3'-(*p*-Tolyl)-2',3'-dihydrospiro[indene-2,1'-phenalene]-1,3-dione

**(3b)**: Obtained as a pale yellow liquid (65.2 mg, 84% yield), eluting with 5% EtOAc in PE (elution gradient);  $^1\text{H NMR}$  (400 MHz,  $\text{CDCl}_3$ )  $\delta$  8.10 - 8.17 (q, 2H), 7.94 - 7.96 (m, 2H), 7.85 (d,  $J = 8.4$  Hz, 1H), 7.78 (d,  $J = 8.0$  Hz, 1H), 7.35 - 7.42 (m, 2H), 7.27 (d,  $J = 8.0$  Hz, 2H), 7.21 (d,  $J = 7.6$  Hz, 2H), 7.01 (d,  $J = 7.2$  Hz, 1H), 6.92 (d,  $J = 7.2$  Hz, 1H), 5.00 - 5.05 (m, 1H), 2.80 - 2.87 (t, 1H), 2.40 (s, 3H), 2.30 - 2.34 (q, 1H);  $^{13}\text{C NMR}$  (101 MHz,  $\text{CDCl}_3$ )  $\delta$  203.4, 200.4, 142.1, 141.1, 140.9, 138.3, 136.5, 136.3, 135.9, 133.9, 131.1, 130.0, 129.4, 129.0, 128.5, 126.7, 125.8, 125.7, 125.0, 124.6, 124.2, 123.6, 58.8, 41.4, 36.6, 21.1; HRMS (ESI-TOF)  $m/z$  calcd for  $\text{C}_{28}\text{H}_{21}\text{O}_2$   $[\text{M} + \text{H}]^+$  389.1536, found 389.1535.

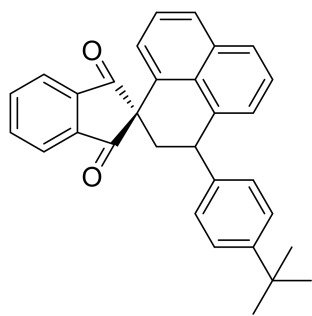

3'-(4-(*Tert*-butyl)phenyl)-2',3'-dihydrospiro[indene-2,1'-phenylene]-1,3-dione (**3c**):

Obtained as a pale yellow liquid (75.7 mg, 88% yield), eluting with 5% EtOAc in PE (elution gradient);  $^1\text{H}$  NMR (400 MHz,  $\text{CDCl}_3$ )  $\delta$  7.94 - 8.02 (m, 2H), 7.76 - 7.79 (m, 2H), 7.70 (d,  $J = 8.4$  Hz, 1H), 7.63 (d,  $J = 8.0$  Hz, 1H), 7.20 - 7.28 (m, 4H), 7.15 (d,  $J = 8.0$  Hz, 2H), 6.88 (d,  $J = 7.6$  Hz, 1H), 6.78 (d,  $J = 7.2$  Hz, 1H), 4.87 - 4.91 (q, 1H), 2.66 - 2.72 (t, 1H), 2.16 - 2.20 (q, 1H), 1.23 (s, 9H);  $^{13}\text{C}$  NMR (101 MHz,  $\text{CDCl}_3$ )  $\delta$  203.4, 200.4, 149.7, 142.1, 141.1, 140.8, 138.3, 136.3, 135.9, 133.8, 131.1, 130.1, 128.7, 128.5, 126.7, 125.8, 125.7, 125.6, 125.0, 124.5, 124.2, 123.6, 58.9, 41.3, 36.7, 34.4, 31.4; HRMS (ESI-TOF)  $m/z$  calcd for  $\text{C}_{31}\text{H}_{27}\text{O}_2$   $[\text{M} + \text{H}]^+$  431.2006, found 431.2008.

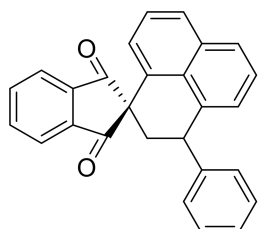

Ph 3'-([1,1'-Biphenyl]-4-yl)-2',3'-dihydrospiro[indene-2,1'-phenylene]-1,3-dione (**3d**):

Obtained as a pale yellow liquid (65.7 mg, 73% yield), eluting with 5% EtOAc in PE (elution gradient);  $^1\text{H}$  NMR (400 MHz,  $\text{CDCl}_3$ )  $\delta$  8.12 - 8.15 (m, 1H), 8.07 - 8.09 (m, 1H), 7.91 - 7.93 (m, 2H), 7.81 (d,  $J = 7.6$  Hz, 1H), 7.75 (d,  $J = 8.0$  Hz, 1H), 7.58 - 7.62 (m, 4H), 7.38 - 7.45 (m, 5H), 7.31 - 7.35 (m, 2H), 7.02 (d,  $J = 6.8$  Hz, 1H), 6.89 (d,  $J = 7.2$  Hz, 1H), 5.05 - 5.09 (m, 1H), 2.80 - 2.86 (t, 1H), 2.30 - 2.35 (q, 1H);  $^{13}\text{C}$  NMR (101 MHz,  $\text{CDCl}_3$ )  $\delta$  203.4, 200.4, 143.1, 142.1, 141.1, 140.8, 139.8, 138.0, 136.4, 136.0, 135.3, 133.9, 131.0, 128.7, 128.6, 127.4, 127.2, 127.1, 127.0, 126.9, 125.8, 125.0, 124.6, 124.3, 123.7, 123.6, 58.8, 41.5, 36.6; HRMS (ESI-TOF)  $m/z$  calcd for  $\text{C}_{33}\text{H}_{23}\text{O}_2$   $[\text{M} + \text{H}]^+$  451.1693, found 451.1692.

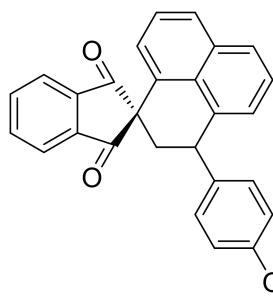

3'-(4-Methoxyphenyl)-2',3'-dihydrospiro[indene-2,1'-phenylene]-1,3-dione (**3e**): Obtained as a pale yellow liquid (65.4 mg, 81% yield), eluting with 5% EtOAc in PE (elution gradient);  $^1\text{H}$  NMR (400 MHz,  $\text{CDCl}_3$ )  $\delta$  7.99 - 8.06 (m, 2H), 7.84 - 7.85 (m, 2H), 7.73 (d,  $J = 8.4$  Hz, 1H), 7.65 (d,  $J = 8.4$  Hz, 1H), 7.22 - 7.30 (m, 2H), 7.17 (d,  $J = 8.0$  Hz, 2H), 6.88 (d,  $J = 7.2$  Hz, 1H), 6.79 - 6.83 (m, 3H), 4.86 - 4.91 (q, 1H), 3.73 (s, 3H), 2.65 - 2.72 (t, 1H), 2.17 - 2.21 (q, 1H);  $^{13}\text{C}$  NMR (101 MHz,  $\text{CDCl}_3$ )  $\delta$  203.5, 200.4, 158.5, 142.1, 141.1, 138.5, 136.3, 135.99, 135.97, 133.9, 131.1, 130.06, 130.07, 128.5, 126.7, 125.8, 125.7, 125.0, 124.6, 124.2, 123.6, 114.1, 58.9, 55.2, 41.0, 36.7; HRMS (ESI-TOF)  $m/z$  calcd for  $\text{C}_{28}\text{H}_{21}\text{O}_3$   $[\text{M} + \text{H}]^+$  405.1485, found 405.1483.

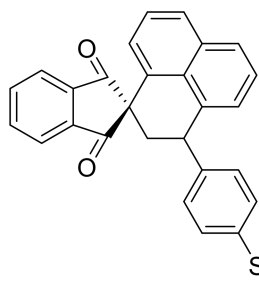

3'-(4-(Methylthio)phenyl)-2',3'-dihydrospiro[indene-2,1'-phenylene]-1,3-dione (**3f**): Obtained as a pale yellow liquid (62.2 mg, 74% yield), eluting with 5% EtOAc in PE (elution gradient);  $^1\text{H}$  NMR (400 MHz,  $\text{CDCl}_3$ )  $\delta$  8.10 - 8.11 (m, 1H), 8.03 - 8.05 (m, 1H), 7.87 - 7.89 (m, 2H), 7.76 - 7.80 (m, 2H), 7.72 (d,  $J = 7.6$  Hz, 1H), 7.30 - 7.36 (m, 2H), 7.21 - 7.25 (m, 3H), 6.94 (d,  $J = 6.8$  Hz, 1H), 6.87 (d,  $J = 7.2$  Hz, 1H), 4.97 - 5.00 (m, 1H), 2.72 - 2.79 (t, 1H), 2.46 (s, 3H), 2.24 - 2.28 (q, 1H);  $^{13}\text{C}$  NMR (101 MHz,  $\text{CDCl}_3$ )  $\delta$  203.3, 200.3, 142.0, 141.0, 140.8, 137.9, 136.8, 136.3, 136.0, 133.8, 131.0, 129.9, 129.6, 128.5, 126.8, 126.8, 125.7, 125.6, 125.0, 124.5, 124.2, 123.5, 58.6, 41.2, 36.4, 15.8; HRMS (ESI-TOF)  $m/z$  calcd for  $\text{C}_{28}\text{H}_{21}\text{SO}_2$   $[\text{M} + \text{H}]^+$  421.1257, found 421.1255.

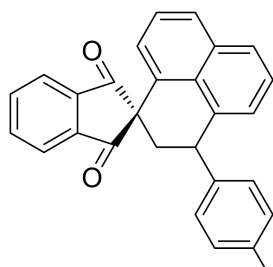

F 3'-(4-Fluorophenyl)-2',3'-dihydrospiro[indene-2,1'-phenalene]-1,

3-dione (**3g**): Obtained as a pale yellow liquid (58.0 mg, 74% yield), eluting with 5% EtOAc in PE (elution gradient);  $^1\text{H}$  NMR (400 MHz,  $\text{CDCl}_3$ )  $\delta$  8.10 - 8.18 (m, 2H), 7.94 - 7.98 (m, 2H), 7.85 (d,  $J = 8.4$  Hz, 1H), 7.78 (d,  $J = 8.0$  Hz, 1H), 7.29 - 7.42 (m, 4H), 7.06 - 7.11 (t, 2H), 6.92 - 6.96 (m, 2H), 5.05 - 5.09 (q, 1H), 2.76 - 2.83 (t, 1H), 2.30 - 2.34 (q, 1H);  $^{13}\text{C}$  NMR (101 MHz,  $\text{CDCl}_3$ )  $\delta$  203.3, 200.3, 161.8 (d,  $J = 243.5$  Hz), 142.1, 141.1, 139.7 (d,  $J = 3.2$  Hz), 137.9, 136.4, 136.0, 133.9, 131.0, 130.6 (d,  $J = 7.6$  Hz), 129.9, 128.5, 126.9, 125.8, 125.6, 125.1, 124.6, 124.3, 123.6, 115.6 (d,  $J = 21.0$  Hz), 58.6, 41.1, 36.6;  $^{19}\text{F}$  NMR (400 MHz,  $\text{CDCl}_3$ )  $\delta$  -115.7; HRMS (ESI-TOF)  $m/z$  calcd for  $\text{C}_{27}\text{H}_{18}\text{FO}_2$   $[\text{M} + \text{H}]^+$  393.1285, found 393.1287.

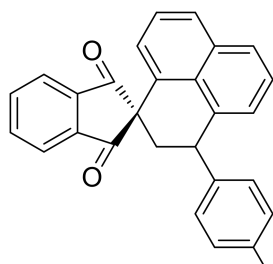

Cl 3'-(4-Chlorophenyl)-2',3'-dihydrospiro[indene-2,1'-phenalene]-

1,3-dione (**3h**): Obtained as a pale yellow liquid (57.9 mg, 71% yield), eluting with 5% EtOAc in PE (elution gradient);  $^1\text{H}$  NMR (400 MHz,  $\text{CDCl}_3$ )  $\delta$  7.98 - 8.06 (m, 2H), 7.82 - 7.87 (m, 2H), 7.73 (d,  $J = 8.4$  Hz, 1H), 7.66 (d,  $J = 8.0$  Hz, 1H), 7.17 - 7.30 (m, 6H), 6.78 - 6.83 (m, 2H), 4.92 - 4.96 (q, 1H), 2.63 - 2.70 (t, 1H), 2.16 - 2.20 (q, 1H);  $^{13}\text{C}$  NMR (101 MHz,  $\text{CDCl}_3$ )  $\delta$  203.2, 200.3, 142.6, 142.1, 141.1, 137.6, 136.4, 136.1, 133.9, 132.7, 131.0, 130.5, 129.9, 128.9, 128.6, 127.0, 125.8, 125.7, 125.1, 124.6, 124.3, 123.7, 58.6, 41.2, 36.4; HRMS (ESI-TOF)  $m/z$  calcd for  $\text{C}_{27}\text{H}_{18}\text{ClO}_2$   $[\text{M} + \text{H}]^+$  409.0990, found 409.0988.

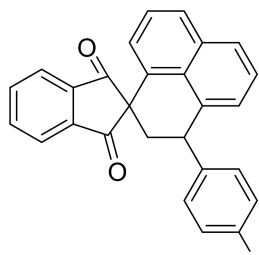

Br 3'--(4-Bromophenyl)-2',3'-dihydrospiro[indene-2,1'-phenalene]-1,3-dione (**3i**): Obtained as a pale yellow liquid (66.0 mg, 73% yield), eluting with 5% EtOAc in PE (elution gradient);  $^1\text{H}$  NMR (400 MHz,  $\text{CDCl}_3$ )  $\delta$  8.00 - 8.06 (m, 2H), 7.83 - 7.85 (m, 2H), 7.73 (d,  $J = 8.4$  Hz, 1H), 7.67 (d,  $J = 8.4$  Hz, 1H), 7.28 - 7.31 (t, 1H), 7.22 - 7.26 (t, 1H), 7.16 - 7.18 (m, 2H), 7.03 - 7.08 (m, 2H), 6.87 (d,  $J = 7.2$  Hz, 1H), 6.80 (d,  $J = 7.2$  Hz, 1H), 5.68 - 5.72 (q, 1H), 2.57 - 2.64 (t, 1H), 2.20 - 2.25 (q, 1H);  $^{13}\text{C}$  NMR (101 MHz,  $\text{CDCl}_3$ )  $\delta$  203.4, 199.8, 143.5, 142.1, 141.2, 136.7, 136.4, 136.0, 134.0, 132.8, 131.1, 130.1, 129.9, 128.6, 128.4, 128.0, 126.9, 126.0, 125.8, 125.3, 125.1, 124.8, 124.3, 123.6, 58.5, 40.4, 35.4; HRMS (ESI-TOF)  $m/z$  calcd for  $\text{C}_{27}\text{H}_{18}\text{BrO}_2$   $[\text{M} + \text{H}]^+$  453.0458, found 453.0456.

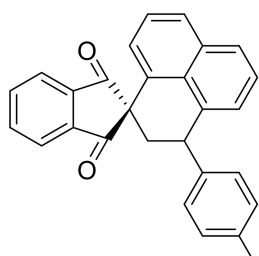

I 3'--(4-Iodophenyl)-2',3'-dihydrospiro[indene-2,1'-phenalene]-1,3-dione (**3j**): Obtained as a pale yellow liquid (73.0 mg, 73% yield), eluting with 5% EtOAc in PE (elution gradient);  $^1\text{H}$  NMR (400 MHz,  $\text{CDCl}_3$ )  $\delta$  8.12 - 8.14 (m, 1H), 8.05 - 8.07 (m, 1H), 7.91 - 7.93 (m, 2H), 7.80 (d,  $J = 8.0$  Hz, 1H), 7.74 (d,  $J = 8.8$  Hz, 1H), 7.67 (d,  $J = 8.4$  Hz, 2H), 7.30 - 7.37 (m, 2H), 7.08 (d,  $J = 8.0$  Hz, 2H), 6.86 - 6.92 (q, 2H), 4.96 - 5.01 (q, 1H), 2.70 - 2.76 (t, 1H), 2.24 - 2.28 (q, 1H);  $^{13}\text{C}$  NMR (101 MHz,  $\text{CDCl}_3$ )  $\delta$  203.2, 200.3, 143.8, 142.1, 141.1, 137.8, 137.4, 136.4, 136.1, 133.8, 131.2, 130.9, 129.8, 128.6, 127.0, 125.8, 125.7, 125.1, 124.6, 124.3, 123.6, 92.3, 58.5, 41.4, 36.2; HRMS (ESI-TOF)  $m/z$  calcd for  $\text{C}_{27}\text{H}_{18}\text{IO}_2$   $[\text{M} + \text{H}]^+$  501.0346, found 501.0344.

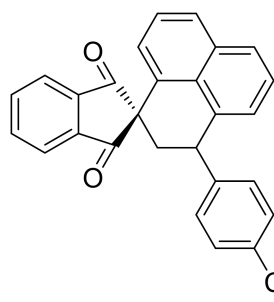

3'-(4-(Trifluoromethyl)phenyl)-2',3'-dihydrospiro[indene-2,1'-phenalene]-1,3-dione (**3k**): Obtained as a pale yellow liquid (60.1 mg, 68% yield), eluting with 5% EtOAc in PE (elution gradient);  $^1\text{H}$  NMR (400 MHz,  $\text{CDCl}_3$ )  $\delta$  7.99 - 8.07 (m, 2H), 7.83 - 7.88 (m, 2H), 7.74 (d,  $J = 8.0$  Hz, 1H), 7.68 (d,  $J = 8.4$  Hz, 1H), 7.54 (d,  $J = 8.0$  Hz, 2H), 7.38 (d,  $J = 8.0$  Hz, 2H), 7.23 - 7.30 (m, 2H), 6.78 - 6.82 (m, 2H), 5.03 - 5.07 (q, 1H), 2.67 - 2.74 (t, 1H), 2.18 - 2.22 (q, 1H);  $^{13}\text{C}$  NMR (101 MHz,  $\text{CDCl}_3$ )  $\delta$  203.1, 200.2, 148.3, 142.2, 141.1, 137.1, 136.5, 136.1, 133.9, 130.9, 129.5 (q,  $J = 25.4, 35.6$  Hz), 128.6, 127.2, 125.7 (q,  $J = 3.9, 7.1$  Hz), 125.2, 124.7, 124.4, 123.7, 58.4, 41.7, 36.3;  $^{19}\text{F}$  NMR (400 MHz,  $\text{CDCl}_3$ )  $\delta$  -62.4; HRMS (ESI-TOF)  $m/z$  calcd for  $\text{C}_{28}\text{H}_{18}\text{F}_3\text{O}_2$   $[\text{M} + \text{H}]^+$  443.1253, found 443.1251.

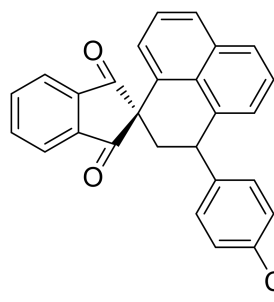

4-(1,3-Dioxo-1,2',3,3'-tetrahydrospiro[indene-2,1'-phenalene]-3'-yl)benzonitrile (**3l**): Obtained as a pale yellow liquid (49.5 mg, 62% yield), eluting with 5% EtOAc in PE (elution gradient);  $^1\text{H}$  NMR (400 MHz,  $\text{CDCl}_3$ )  $\delta$  7.99 - 8.08 (m, 2H), 7.84 - 7.90 (m, 2H), 7.74 (d,  $J = 8.4$  Hz, 1H), 7.69 (d,  $J = 8.4$  Hz, 1H), 7.58 (d,  $J = 8.0$  Hz, 2H), 7.37 (d,  $J = 8.0$  Hz, 2H), 7.24 - 7.31 (m, 2H), 6.81 (d,  $J = 7.2$  Hz, 1H), 6.75 (d,  $J = 7.2$  Hz, 1H), 5.04 - 5.08 (q, 1H), 2.64 - 2.71 (t, 1H), 2.17 - 2.22 (q, 1H);  $^{13}\text{C}$  NMR (101 MHz,  $\text{CDCl}_3$ )  $\delta$  202.9, 200.1, 149.9, 142.1, 141.1, 136.6, 136.5, 136.2, 133.9, 132.6, 130.8, 130.0, 129.7, 128.7, 127.4, 125.7, 125.6, 125.3, 124.7, 124.4, 123.7, 118.8, 110.9, 58.2, 42.0, 36.0; HRMS (ESI-TOF)  $m/z$  calcd for  $\text{C}_{28}\text{H}_{18}\text{NO}_2$   $[\text{M} + \text{H}]^+$  400.1332, found 400.1331.

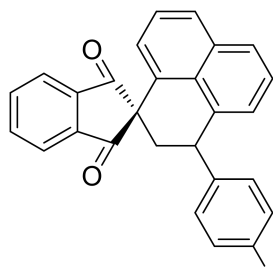

NO<sub>2</sub> 3'-(4-Nitrophenyl)-2',3'-dihydrospiro[indene-2,1'-phenalene]-

1,3-dione (**3m**): Obtained as a pale yellow liquid (53.6 mg, 64% yield), eluting with 5% EtOAc in PE (elution gradient); <sup>1</sup>H NMR (400 MHz, CDCl<sub>3</sub>) δ 8.01 - 8.08 (m, 2H), 7.86 - 7.88 (m, 2H), 7.75 (d, *J* = 8.0 Hz, 1H), 7.67 (d, *J* = 8.0 Hz, 1H), 7.22 - 7.31 (m, 6H), 6.87 (d, *J* = 6.8 Hz, 1H), 6.81 (d, *J* = 6.8 Hz, 1H), 4.92 - 4.96 (q, 1H), 2.70 - 2.76 (t, 1H), 2.20 - 2.25 (q, 1H); <sup>13</sup>C NMR (101 MHz, CDCl<sub>3</sub>) δ 200.4, 197.2, 144.0, 142.2, 141.2, 138.1, 136.4, 136.0, 133.9, 131.1, 129.3, 129.2, 128.8, 128.6, 127.0, 126.8, 125.8, 125.8, 125.0, 124.6, 124.3, 123.7, 58.8, 41.8, 36.6; HRMS (ESI-TOF) *m/z* calcd for C<sub>27</sub>H<sub>18</sub>NO<sub>4</sub> [M + H]<sup>+</sup> 420.1230, found 420.1231.

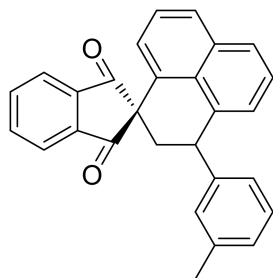

3'-(*m*-Tolyl)-2',3'-dihydrospiro[indene-2,1'-phenalene]-1,3-dione

(**3n**): Obtained as a pale yellow liquid (59.8 mg, 77% yield), eluting with 5% EtOAc in PE (elution gradient); <sup>1</sup>H NMR (400 MHz, CDCl<sub>3</sub>) δ 7.99 - 8.07 (q, 2H), 7.85 - 7.86 (m, 2H), 7.74 (d, *J* = 8.4 Hz, 1H), 7.66 (d, *J* = 8.0 Hz, 1H), 7.23 - 7.31 (m, 2H), 7.15 - 7.19 (t, 1H), 7.02 - 7.08 (m, 3H), 6.89 (d, *J* = 7.2 Hz, 1H), 6.80 (d, *J* = 7.2 Hz, 1H), 4.87 - 4.92 (m, 1H), 2.69 - 2.75 (t, 1H), 2.26 (s, 3H), 2.18 - 2.23 (q, 1H); <sup>13</sup>C NMR (101 MHz, CDCl<sub>3</sub>) δ 203.5, 200.4, 143.9, 142.1, 141.1, 138.3, 138.2, 136.3, 136.0, 133.9, 131.1, 130.0, 128.6, 128.5, 127.7, 126.7, 125.8, 125.8, 125.0, 124.6, 124.3, 123.6, 58.9, 41.8, 36.6, 21.4; HRMS (ESI-TOF) *m/z* calcd for C<sub>28</sub>H<sub>21</sub>O<sub>2</sub> [M + H]<sup>+</sup> 389.1536, found 389.1538.

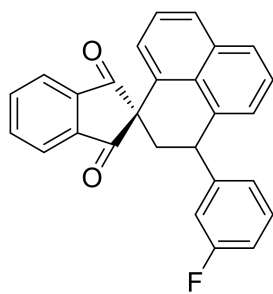

3'-(3-Fluorophenyl)-2',3'-dihydrospiro[indene-2,1'-phenalene]-1,

3-dione (**3o**): Obtained as a pale yellow liquid (54.9 mg, 70% yield), eluting with 5% EtOAc in PE (elution gradient);  $^1\text{H}$  NMR (400 MHz,  $\text{CDCl}_3$ )  $\delta$  7.99 - 8.08 (q, 2H), 7.85 - 7.89 (m, 2H), 7.74 (d,  $J = 8.4$  Hz, 1H), 7.68 (d,  $J = 8.0$  Hz, 1H), 7.22 - 7.32 (m, 3H), 7.05 (d,  $J = 7.6$  Hz, 1H), 6.86 - 6.98 (m, 3H), 6.80 (d,  $J = 7.2$  Hz, 1H), 4.95 - 4.99 (m, 1H), 2.65 - 2.72 (t, 1H), 2.20 - 2.24 (q, 1H);  $^{13}\text{C}$  NMR (101 MHz,  $\text{CDCl}_3$ )  $\delta$  203.2, 200.3, 163.1 (d,  $J = 244.5$  Hz), 146.7 (d,  $J = 6.9$  Hz), 142.2, 141.1, 137.3, 136.4, 136.1, 133.9, 130.9, 130.2 (d,  $J = 8.1$  Hz), 129.9, 128.6, 127.1, 125.7 (d,  $J = 13.0$  Hz), 125.1, 124.9, 124.7, 124.3, 123.7, 116.0 (d,  $J = 21.0$  Hz), 113.9 (d,  $J = 20.9$  Hz), 58.6, 41.7, 36.3;  $^{19}\text{F}$  NMR (400 MHz,  $\text{CDCl}_3$ )  $\delta$  -112.8; HRMS (ESI-TOF)  $m/z$  calcd for  $\text{C}_{27}\text{H}_{18}\text{FO}_2$   $[\text{M} + \text{H}]^+$  393.1285, found 393.1286.

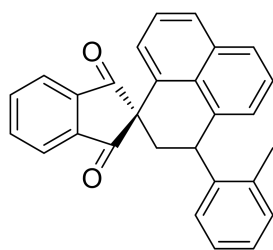

3'-(*o*-Tolyl)-2',3'-dihydrospiro[indene-2,1'-phenalene]-1,3-dione

(**3p**): Obtained as a pale yellow liquid (56.6 mg, 73% yield), eluting with 5% EtOAc in PE (elution gradient);  $^1\text{H}$  NMR (400 MHz,  $\text{CDCl}_3$ )  $\delta$  8.00 - 8.06 (m, 2H), 7.84 - 7.86 (m, 2H), 7.73 (d,  $J = 8.0$  Hz, 1H), 7.65 (d,  $J = 8.0$  Hz, 1H), 7.23 - 7.29 (m, 2H), 7.11 - 7.17 (m, 4H), 6.77 - 7.80 (m, 2H), 5.33 - 5.37 (q, 1H), 2.70 - 2.77 (t, 1H), 2.39 (s, 3H), 2.14 - 2.18 (q, 1H);  $^{13}\text{C}$  NMR (101 MHz,  $\text{CDCl}_3$ )  $\delta$  203.5, 200.6, 142.2, 142.1, 141.2, 137.9, 137.1, 136.3, 136.0, 134.0, 131.2, 130.2, 128.6, 127.9, 126.7, 126.6, 125.8, 125.1, 124.6, 124.3, 123.6, 58.8, 36.1, 35.7, 19.6; HRMS (ESI-TOF)  $m/z$  calcd for  $\text{C}_{28}\text{H}_{21}\text{O}_2$   $[\text{M} + \text{H}]^+$  389.1536, found 389.1535.



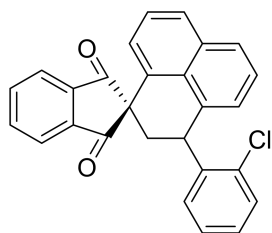

3'-(2-Chlorophenyl)-2',3'-dihydrospiro[indene-2,1'-phenalene]-1,3-dione (**3q**): Obtained as a pale yellow liquid (53.9 mg, 66% yield), eluting with 5% EtOAc in PE (elution gradient);  $^1\text{H}$  NMR (400 MHz,  $\text{CDCl}_3$ )  $\delta$  8.14 - 8.16 (m, 1H), 8.09 - 8.12 (m, 1H), 7.93 - 7.97 (m, 2H), 7.82 (d,  $J = 8.4$  Hz, 1H), 7.76 (d,  $J = 8.0$  Hz, 1H), 7.44 - 7.47 (m, 1H), 7.31 - 7.41 (m, 3H), 7.25 - 7.29 (m, 1H), 7.22 - 7.24 (m, 1H), 6.95 (d,  $J = 7.2$  Hz, 1H), 6.88 (d,  $J = 7.2$  Hz, 1H), 5.78 - 5.82 (m, 1H), 2.68 - 2.74 (t, 1H), 2.28 - 2.32 (q, 1H);  $^{13}\text{C}$  NMR (101 MHz,  $\text{CDCl}_3$ )  $\delta$  203.5, 199.9, 142.1, 141.7, 141.2, 136.7, 136.4, 136.0, 135.1, 134.0, 131.0, 130.1, 129.8, 129.4, 128.6, 128.1, 127.3, 126.9, 125.8, 125.3, 125.1, 124.8, 124.3, 123.6, 58.5, 37.3, 35.4; HRMS (ESI-TOF)  $m/z$  calcd for  $\text{C}_{27}\text{H}_{18}\text{ClO}_2$   $[\text{M} + \text{H}]^+$  409.0990, found 409.0993.

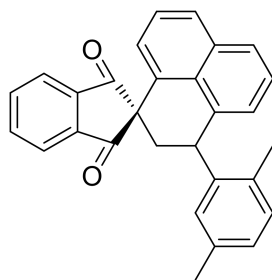

3'-(2,5-Dimethylphenyl)-2',3'-dihydrospiro[indene-2,1'-phenalene]-1,3-dione (**3r**): Obtained as a pale yellow liquid (66.7 mg, 83% yield), eluting with 5% EtOAc in PE (elution gradient);  $^1\text{H}$  NMR (400 MHz,  $\text{CDCl}_3$ )  $\delta$  7.99 - 8.07 (m, 2H), 7.84 - 7.86 (m, 2H), 7.73 (d,  $J = 8.0$  Hz, 1H), 7.66 (d,  $J = 8.0$  Hz, 1H), 7.25 - 7.30 (m, 2H), 7.05 (d,  $J = 7.6$  Hz, 1H), 6.91 - 6.94 (m, 2H), 6.79 - 6.83 (t, 2H), 5.28 - 5.32 (q, 1H), 2.71 - 2.77 (t, 1H), 2.34 (s, 3H), 2.13 - 2.17 (q, 4H);  $^{13}\text{C}$  NMR (101 MHz,  $\text{CDCl}_3$ )  $\delta$  203.6, 200.5, 142.2, 141.8, 141.2, 138.0, 136.3, 136.0, 133.9, 133.9, 131.2, 130.2, 130.1, 128.5, 128.4, 127.4, 126.6, 125.9, 125.1, 125.0, 124.6, 124.3, 123.6, 58.9, 36.1, 35.7, 21.0, 19.7; HRMS (ESI-TOF)  $m/z$  calcd for  $\text{C}_{29}\text{H}_{23}\text{O}_2$   $[\text{M} + \text{H}]^+$  403.1693, found 403.1692.

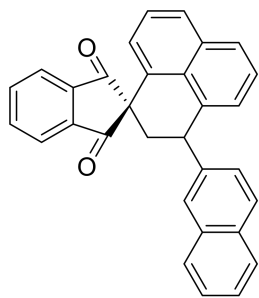

3'-(Naphthalen-2-yl)-2',3'-dihydrospiro[indene-2,1'-phenalene]-1,3-dione (**3s**): Obtained as a pale yellow liquid (76.3 mg, 90% yield), eluting with 5% EtOAc in PE (elution gradient);  $^1\text{H}$  NMR (400 MHz,  $\text{CDCl}_3$ )  $\delta$  8.11 - 8.14 (m, 1H), 8.07 - 8.09 (m, 1H), 7.78 - 7.90 (m, 8H), 7.45 - 7.47 (m, 2H), 7.30 - 7.38 (m, 3H), 6.90 - 6.95 (m, 2H), 5.21 (d,  $J = 13.2$  Hz, 1H), 2.88 - 2.95 (m, 1H), 2.32 - 2.36 (m, 1H);  $^{13}\text{C}$  NMR (101 MHz,  $\text{CDCl}_3$ )  $\delta$  203.4, 200.4, 142.1, 141.5, 141.3, 141.1, 137.9, 136.4, 136.0, 135.3, 133.9, 133.6, 132.6, 128.5, 128.5, 127.7, 127.6, 126.9, 126.6, 126.1, 126.0, 125.8, 125.7, 125.0, 124.6, 124.3, 123.7, 123.6, 58.7, 41.9, 36.4; HRMS (ESI-TOF)  $m/z$  calcd for  $\text{C}_{31}\text{H}_{21}\text{O}_2$   $[\text{M} + \text{H}]^+$  425.1536, found 425.1534.

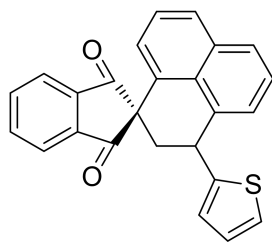

3'-(Thiophen-2-yl)-2',3'-dihydrospiro[indene-2,1'-phenalene]-1,3-dione (**3t**): Obtained as a pale yellow liquid (62.3 mg, 82% yield), eluting with 5% EtOAc in PE (elution gradient);  $^1\text{H}$  NMR (400 MHz,  $\text{CDCl}_3$ )  $\delta$  8.05 - 8.07 (t, 1H), 7.98 - 8.00 (m, 1H), 7.83 - 7.87 (m, 2H), 6.73 (d,  $J = 8.0$  Hz, 1H), 6.67 (d,  $J = 8.4$  Hz, 1H), 7.30 - 7.34 (t, 1H), 7.22 - 7.26 (t, 1H), 7.17 (d,  $J = 4.2$  Hz, 1H), 7.07 (d,  $J = 7.2$  Hz, 1H), 7.01 (d,  $J = 3.2$  Hz, 1H), 6.93 - 6.95 (t, 1H), 6.79 (d,  $J = 7.2$  Hz, 1H), 5.31 - 5.35 (m, 1H), 2.72 - 2.79 (t, 1H), 2.33 - 2.37 (q, 1H);  $^{13}\text{C}$  NMR (101 MHz,  $\text{CDCl}_3$ )  $\delta$  203.0, 200.3, 146.8, 142.2, 141.1, 137.4, 136.4, 136.1, 133.8, 130.8, 129.5, 128.5, 127.2, 126.6, 126.4, 125.9, 125.3, 125.1, 124.6, 124.4, 124.3, 123.7, 58.6, 37.2, 37.0; HRMS (ESI-TOF)  $m/z$  calcd for  $\text{C}_{25}\text{H}_{17}\text{O}_2\text{S}$   $[\text{M} + \text{H}]^+$  381.0944, found 381.0946.

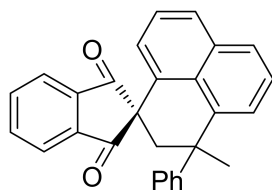

3'-Methyl-3'-phenyl-2',3'-dihydrospiro[indene-2,1'-phenalene]-1,3-dione (**3u**): Obtained as a pale yellow liquid (54.3 mg, 70% yield), eluting with 5% EtOAc in PE (elution gradient);  $^1\text{H}$  NMR (400 MHz,  $\text{CDCl}_3$ )  $\delta$  8.02 (d,  $J = 7.2$  Hz, 1H), 7.91 (d,  $J = 6.8$  Hz, 1H), 7.76 - 7.85 (m, 3H), 7.71 (d,  $J = 8.0$  Hz, 1H), 7.35 - 7.39 (t, 1H), 7.25 - 7.29 (t, 1H), 7.11 - 7.19 (m, 6H), 6.74 (d,  $J = 7.2$  Hz, 1H), 2.85 (d,  $J = 10.0$  Hz, 1H), 2.32 (d,  $J = 14.0$  Hz, 1H), 1.89 (s, 3H);  $^{13}\text{C}$  NMR (101 MHz,  $\text{CDCl}_3$ )  $\delta$  201.8, 201.3, 150.2, 142.1, 141.9, 135.9, 135.9, 134.0, 131.0, 129.9, 128.7, 127.9, 127.7, 126.9, 126.2, 126.2, 125.8, 125.2, 125.1, 124.4, 123.9, 60.3, 44.6, 43.1, 30.7; HRMS (ESI-TOF)  $m/z$  calcd for  $\text{C}_{28}\text{H}_{21}\text{O}_2$   $[\text{M} + \text{H}]^+$  389.1536, found 389.1535.

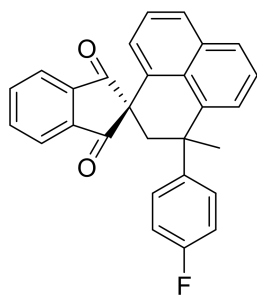

3'-(4-Fluorophenyl)-3'-methyl-2',3'-dihydrospiro[indene-2,1'-phenalene]-1,3-dione (**3v**): Obtained as a pale yellow liquid (50.3 mg, 62% yield), eluting with 5% EtOAc in PE (elution gradient);  $^1\text{H}$  NMR (400 MHz,  $\text{CDCl}_3$ )  $\delta$  8.08 - 8.10 (m, 1H), 7.97 - 7.99 (m, 1H), 7.83 - 7.91 (m, 3H), 7.79 (d,  $J = 8.0$  Hz, 1H), 7.43 - 7.47 (t, 1H), 7.32 - 7.36 (m, 1H), 7.18 - 7.22 (m, 3H), 6.90 - 6.96 (m, 2H), 6.80 - 6.82 (q, 1H), 2.86 (d,  $J = 14.4$  Hz, 1H), 2.40 (d,  $J = 14.4$  Hz, 1H), 1.94 (s, 3H);  $^{13}\text{C}$  NMR (101 MHz,  $\text{CDCl}_3$ )  $\delta$  201.7, 201.2, 161.2 (d,  $J = 243.6$  Hz), 145.8 (d,  $J = 3.2$  Hz), 141.9 (d,  $J = 10.5$  Hz), 141.7, 135.9 (d,  $J = 4.5$  Hz), 134.0, 130.9, 129.7, 129.3, 129.2, 128.7, 127.0, 126.1, 125.8, 125.3, 125.2, 124.3, 124.0, 114.7, 114.5, 60.1, 44.6, 42.6, 31.0;  $^{19}\text{F}$  NMR (400 MHz,  $\text{CDCl}_3$ )  $\delta$  -117.0; HRMS (ESI-TOF)  $m/z$  calcd for  $\text{C}_{28}\text{H}_{20}\text{FO}_2$   $[\text{M} + \text{H}]^+$  407.1442, found 407.1445.

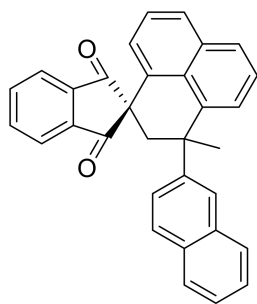

3'-Methyl-3'-(naphthalen-2-yl)-2',3'-dihydrospiro[indene-2,1'-phenalene]-1,3-dione (**3w**): Obtained as a pale yellow liquid (57.8 mg, 66% yield), eluting with 5% EtOAc in PE (elution gradient);  $^1\text{H NMR}$  (400 MHz,  $\text{CDCl}_3$ )  $\delta$  8.09 (d,  $J = 7.2$  Hz, 1H), 7.98 (d,  $J = 6.8$  Hz, 1H), 7.83 - 7.88 (m, 4H), 7.76 - 7.78 (m, 3H), 7.69 (d,  $J = 8.8$  Hz, 1H), 7.41 - 7.45 (m, 2H), 7.34 - 7.39 (m, 2H), 7.28 - 7.30 (m, 1H), 7.11 (d,  $J = 7.2$  Hz, 1H), 6.84 (d,  $J = 6.8$  Hz, 1H), 3.06 (d,  $J = 14.4$  Hz, 1H), 2.35 (d,  $J = 14.4$  Hz, 1H), 2.09 (s, 3H);  $^{13}\text{C NMR}$  (101 MHz,  $\text{CDCl}_3$ )  $\delta$  202.4, 201.0, 147.6, 142.2, 142.1, 141.8, 136.1, 135.8, 134.0, 132.9, 131.9, 130.9, 129.7, 128.7, 128.0, 127.7, 127.4, 127.1, 126.8, 126.4, 125.9, 125.9, 125.7, 125.5, 125.2, 125.1, 124.4, 123.9, 60.1, 44.1, 43.3, 26.9; HRMS (ESI-TOF)  $m/z$  calcd for  $\text{C}_{32}\text{H}_{23}\text{O}_2$  [ $\text{M} + \text{H}$ ] $^+$  439.1693, found 439.1692.

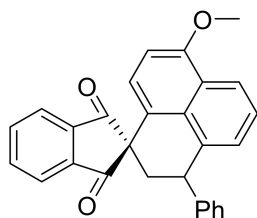

7'-Methoxy-3'-phenyl-2',3'-dihydrospiro[indene-2,1'-phenalene]-1,3-dione (**3x**): Obtained as a pale yellow liquid (73.5 mg, 91% yield), eluting with 5% EtOAc in PE (elution gradient);  $^1\text{H NMR}$  (400 MHz,  $\text{CDCl}_3$ )  $\delta$  7.97 - 8.02 (m, 2H), 7.78 - 7.83 (m, 3H), 7.66 (d,  $J = 8.0$  Hz, 1H), 7.23 - 7.34 (m, 5H), 7.12 - 7.19 (m, 2H), 6.81 (d,  $J = 6.8$  Hz, 1H), 4.69 - 4.72 (m, 1H), 3.46 (s, 3H), 2.62 - 2.69 (t, 1H), 2.21 - 2.25 (q, 1H);  $^{13}\text{C NMR}$  (101 MHz,  $\text{CDCl}_3$ )  $\delta$  203.4, 202.9, 152.7, 143.2, 140.7, 138.8, 136.7, 135.4, 135.2, 131.6, 130.1, 129.2, 129.0, 128.6, 126.9, 126.6, 125.3, 123.5, 123.4, 122.8, 116.5, 112.9, 56.9, 55.8, 41.6, 37.1; HRMS (ESI-TOF)  $m/z$  calcd for  $\text{C}_{28}\text{H}_{21}\text{O}_3$  [ $\text{M} + \text{H}$ ] $^+$  405.1485, found 405.1484.

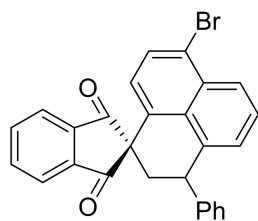

7'-Bromo-3'-phenyl-2',3'-dihydrospiro[indene-2,1'-phenalene]-1,3-dione (**3y**): Obtained as a pale yellow liquid (48.8 mg, 54% yield), eluting with 5% EtOAc in PE (elution gradient);  $^1\text{H}$  NMR (400 MHz,  $\text{CDCl}_3$ )  $\delta$  8.16 (d,  $J = 8.4$  Hz, 1H), 8.08 - 8.10 (m, 1H), 8.03 - 8.05 (m, 1H), 7.86 - 7.89 (m, 2H), 7.62 (d,  $J = 7.6$  Hz, 1H), 7.42 - 7.46 (m, 1H), 7.27 - 7.37 (m, 5H), 7.00 (d,  $J = 7.6$  Hz, 1H), 6.73 (d,  $J = 8.0$  Hz, 1H), 4.96 - 5.01 (m, 1H), 2.73 - 2.80 (t, 1H), 2.26 - 2.31 (q, 1H);  $^{13}\text{C}$  NMR (101 MHz,  $\text{CDCl}_3$ )  $\delta$  202.9, 200.0, 143.8, 142.0, 141.0, 138.8, 136.6, 136.3, 135.6, 132.4, 131.4, 131.2, 129.2, 129.0, 128.8, 128.4, 127.2, 127.0, 126.3, 124.7, 123.8, 123.5, 58.8, 41.9, 36.7; HRMS (ESI-TOF)  $m/z$  calcd for  $\text{C}_{27}\text{H}_{18}\text{BrO}_2$   $[\text{M} + \text{H}]^+$  453.0485, found 453.0488.

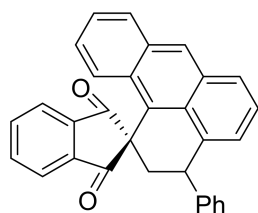

3-Phenyl-2,3-dihydrospiro[benzo[de]anthracene-1,2'-indene]-1',3'-dione (**3z**): Obtained as a pale yellow liquid (73.8 mg, 87% yield), eluting with 5% EtOAc in PE (elution gradient);  $^1\text{H}$  NMR (400 MHz,  $\text{CDCl}_3$ )  $\delta$  8.53 (s, 1H), 8.13 - 8.17 (m, 2H), 7.91 - 8.04 (m, 4H), 7.28 - 7.40 (m, 7H), 7.16 - 7.21 (m, 2H), 6.79 (d,  $J = 6.8$  Hz, 1H), 4.70 (d,  $J = 13.2$  Hz, 1H), 2.84 - 2.91 (t, 1H), 2.42 - 2.47 (q, 1H);  $^{13}\text{C}$  NMR (101 MHz,  $\text{CDCl}_3$ )  $\delta$  203.1, 202.0, 142.7, 140.1, 138.8, 138.1, 136.3, 136.2, 131.7, 131.6, 131.0, 129.7, 129.1, 128.8, 128.7, 127.6, 127.2, 126.4, 125.7, 124.7, 124.6, 124.4, 124.2, 124.2, 61.5, 42.0, 40.3; HRMS (ESI-TOF)  $m/z$  calcd for  $\text{C}_{31}\text{H}_{21}\text{O}_2$   $[\text{M} + \text{H}]^+$  425.1536, found 425.1537.

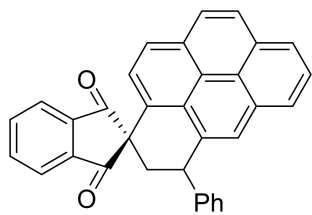

5-Phenyl-4,5-dihydrospiro[benzo[cd]pyrene-3,2'-indene]-1',3'

-dione (**3aa**): Obtained as a pale yellow liquid (78.8 mg, 88% yield), eluting with 5% EtOAc in PE (elution gradient);  $^1\text{H}$  NMR (400 MHz,  $\text{CDCl}_3$ )  $\delta$  8.15 - 8.17 (m, 1H), 8.03 - 8.12 (m, 5H), 7.98 - 8.01 (m, 1H), 7.90 - 7.96 (m, 4H), 7.44 - 7.50 (m, 3H), 7.36 - 7.43 (m, 3H), 5.17 - 5.21 (m, 1H), 2.94 - 3.01 (t, 1H), 2.40 - 2.45 (q, 1H);  $^{13}\text{C}$  NMR (101 MHz,  $\text{CDCl}_3$ )  $\delta$  203.7, 200.7, 143.6, 142.1, 141.1, 136.8, 136.4, 136.1, 131.1, 131.0, 130.6, 129.4, 128.9, 128.8, 128.6, 128.4, 127.7, 127.2, 127.1, 126.4, 126.1, 125.2, 124.9, 124.8, 124.7, 124.6, 124.4, 123.8, 123.7, 123.6, 59.6, 42.1, 37.1; HRMS (ESI-TOF)  $m/z$  calcd for  $\text{C}_{33}\text{H}_{21}\text{O}_2$   $[\text{M} + \text{H}]^+$  449.1536, found 449.1535.

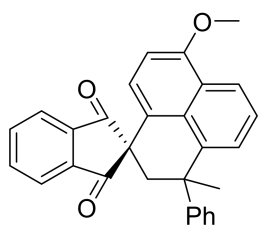

7'-Methoxy-3'-methyl-3'-phenyl-2',3'-dihydrospiro[indene-2,1'-ph

enalene]-1,3-dione(**3ab**): Obtained as a pale yellow liquid (70.2 mg, 84% yield), eluting with 5% EtOAc in PE (elution gradient);  $^1\text{H}$  NMR (400 MHz,  $\text{CDCl}_3$ )  $\delta$  8.02 - 8.03 (m, 1H), 7.89 - 7.91 (m, 2H), 7.79 - 7.86 (m, 2H), 7.73 (d,  $J = 8.4$  Hz, 1H), 7.23 - 7.29 (m, 5H), 7.17 - 7.21 (m, 2H), 7.08 (d,  $J = 7.2$  Hz, 1H), 3.47 (s, 3H), 2.75 (d,  $J = 14.4$  Hz, 1H), 2.25 (d,  $J = 14.0$  Hz, 1H), 1.84 (s, 3H);  $^{13}\text{C}$  NMR (101 MHz,  $\text{CDCl}_3$ )  $\delta$  203.1, 202.6, 152.8, 149.5, 140.9, 140.03, 140.02, 135.2, 135.1, 131.2, 130.4, 129.5, 127.9, 127.7, 126.7, 126.2, 126.0, 123.6, 123.5, 123.1, 116.2, 112.8, 58.4, 55.9, 44.8, 43.4, 29.7; HRMS (ESI-TOF)  $m/z$  calcd for  $\text{C}_{29}\text{H}_{23}\text{O}_3$   $[\text{M} + \text{H}]^+$  419.1642, found 419.1643.

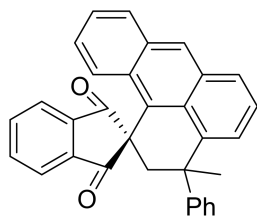

3-Methyl-3-phenyl-2,3-dihydrospiro[benzo[de]anthracene-1,2'-in

dene]-1',3'-dione (**3ac**): Obtained as a pale yellow liquid (70.1 mg, 80% yield), eluting with 5% EtOAc in PE (elution gradient);  $^1\text{H}$  NMR (400 MHz,  $\text{CDCl}_3$ )  $\delta$  8.57 (s, 1H), 8.14 - 8.16 (m, 1H), 7.90 - 8.04 (m, 5H), 7.40 - 7.43 (q, 1H), 7.33 - 7.37 (m, 1H), 7.19 - 7.27 (m, 6H), 7.12 - 7.16 (m, 1H), 6.98 (d,  $J = 8.8$  Hz, 1H), 2.98 (d,  $J = 14.0$  Hz, 1H), 2.52 (d,  $J = 14.0$  Hz, 1H), 1.87 (s, 3H);  $^{13}\text{C}$  NMR (101 MHz,  $\text{CDCl}_3$ )  $\delta$  201.8, 201.5, 148.8, 141.6, 140.0, 139.9, 136.0, 135.9, 132.0, 131.6, 130.5, 129.7, 129.6, 128.7, 128.0, 127.9, 127.5, 126.5, 125.4, 125.3, 124.7, 124.6, 124.5, 124.2, 124.1, 62.6, 47.4, 43.5, 29.9; HRMS (ESI-TOF)  $m/z$  calcd for  $\text{C}_{32}\text{H}_{23}\text{O}_2$  [ $\text{M} + \text{H}$ ] $^+$  439.1693, found 439.1695.

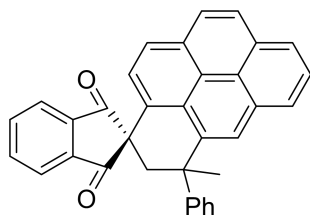

5-Methyl-5-phenyl-4,5-dihydrospiro[benzo[cd]pyrene-3,2'-in

dene]-1',3'-dione (**3ad**): Obtained as a pale yellow liquid (70.2 mg, 76% yield), eluting with 5% EtOAc in PE (elution gradient);  $^1\text{H}$  NMR (400 MHz,  $\text{CDCl}_3$ )  $\delta$  7.95 - 8.17 (m, 8H), 7.87 - 7.93 (m, 2H), 7.78 (s, 1H), 6.42 (d,  $J = 7.6$  Hz, 2H), 7.24 - 7.33 (m, 4H), 3.08 (d,  $J = 14.4$  Hz, 1H), 2.53 (d,  $J = 14.4$  Hz, 1H), 2.10 (s, 3H);  $^{13}\text{C}$  NMR (101 MHz,  $\text{CDCl}_3$ )  $\delta$  202.0, 201.4, 149.6, 142.2, 142.0, 140.9, 136.0, 135.9, 131.2, 131.1, 130.7, 128.6, 128.4, 128.1, 127.8, 127.6, 127.4, 126.8, 126.4, 126.1, 125.3, 125.3, 125.0, 124.8, 124.4, 124.0, 123.6, 61.1, 44.9, 43.6, 30.6; HRMS (ESI-TOF)  $m/z$  calcd for  $\text{C}_{34}\text{H}_{23}\text{O}_2$  [ $\text{M} + \text{H}$ ] $^+$  463.1693, found 463.1695.

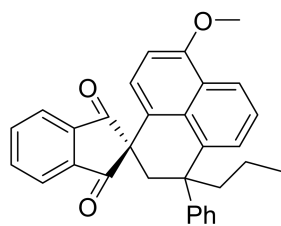

7'-Methoxy-3'-phenyl-3'-propyl-2',3'-dihydrospiro[indene-2,1'-p

henalene]-1,3-dione (**3ae**): Obtained as a pale yellow liquid (63.3 mg, 71% yield), eluting with 5% EtOAc in PE (elution gradient);  $^1\text{H}$  NMR (400 MHz,  $\text{CDCl}_3$ )  $\delta$  8.05 (d,  $J = 7.2$  Hz, 1H), 7.79 - 7.92 (m, 4H), 7.75 (d,  $J = 8.0$  Hz, 1H), 7.29 - 7.33 (t, 1H), 7.14 - 7.31 (m, 7H), 3.46 (s, 3H), 2.68 (d,  $J = 14.0$  Hz, 1H), 2.40 (d,  $J = 14.0$  Hz, 1H), 2.24 - 2.32 (m, 1H), 2.07 - 2.14 (m, 1H), 1.28 - 1.38 (m, 1H), 1.06 - 1.17 (m, 1H), 0.85 - 0.89 (t, 3H);  $^{13}\text{C}$  NMR (101 MHz,  $\text{CDCl}_3$ )  $\delta$  202.8, 152.8, 147.7, 140.1, 140.0, 137.6, 135.1, 131.8, 130.4, 129.8, 128.0, 127.9, 127.0, 126.9, 126.1, 123.6, 123.1, 122.9, 116.3, 112.8, 58.5, 56.0, 47.2, 42.8, 41.8, 18.5, 14.3; HRMS (ESI-TOF)  $m/z$  calcd for  $\text{C}_{31}\text{H}_{27}\text{O}_3$   $[\text{M} + \text{H}]^+$  447.1955, found 447.1954.

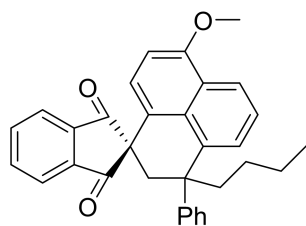

3'-Butyl-7'-methoxy-3'-phenyl-2',3'-dihydrospiro[indene-2,1'-p

henalene]-1,3-dione (**3af**): Obtained as a pale yellow liquid (57.0 mg, 62% yield), eluting with 5% EtOAc in PE (elution gradient);  $^1\text{H}$  NMR (400 MHz,  $\text{CDCl}_3$ )  $\delta$  8.04 (d,  $J = 6.8$  Hz, 1H), 7.75 - 7.91 (m, 5H), 7.31 - 7.34 (t, 1H), 7.17 - 7.26 (m, 7H), 6.74 (d,  $J = 7.2$  Hz, 1H), 3.46 (s, 3H), 2.67 (d,  $J = 14.4$  Hz, 1H), 2.43 (d,  $J = 14.4$  Hz, 1H), 2.25 - 2.32 (m, 1H), 2.10 - 2.17 (m, 1H), 1.21 - 1.34 (m, 4H), 0.81 - 0.84 (t, 3H);  $^{13}\text{C}$  NMR (101 MHz,  $\text{CDCl}_3$ )  $\delta$  202.8, 202.6, 152.8, 147.8, 140.1, 140.0, 137.4, 135.1, 131.8, 130.4, 129.7, 128.0, 127.9, 127.0, 126.9, 126.1, 123.6, 123.2, 122.9, 116.3, 112.8, 58.5, 56.0, 47.1, 42.7, 39.6, 27.4, 23.1, 14.1; HRMS (ESI-TOF)  $m/z$  calcd for  $\text{C}_{32}\text{H}_{29}\text{O}_3$   $[\text{M} + \text{H}]^+$  461.2111, found 461.2108.



# Copies of $^1\text{H}$ and $^{13}\text{C}$ NMR spectra of products

## $^1\text{H}$ NMR and $^{13}\text{C}$ NMR of 3a

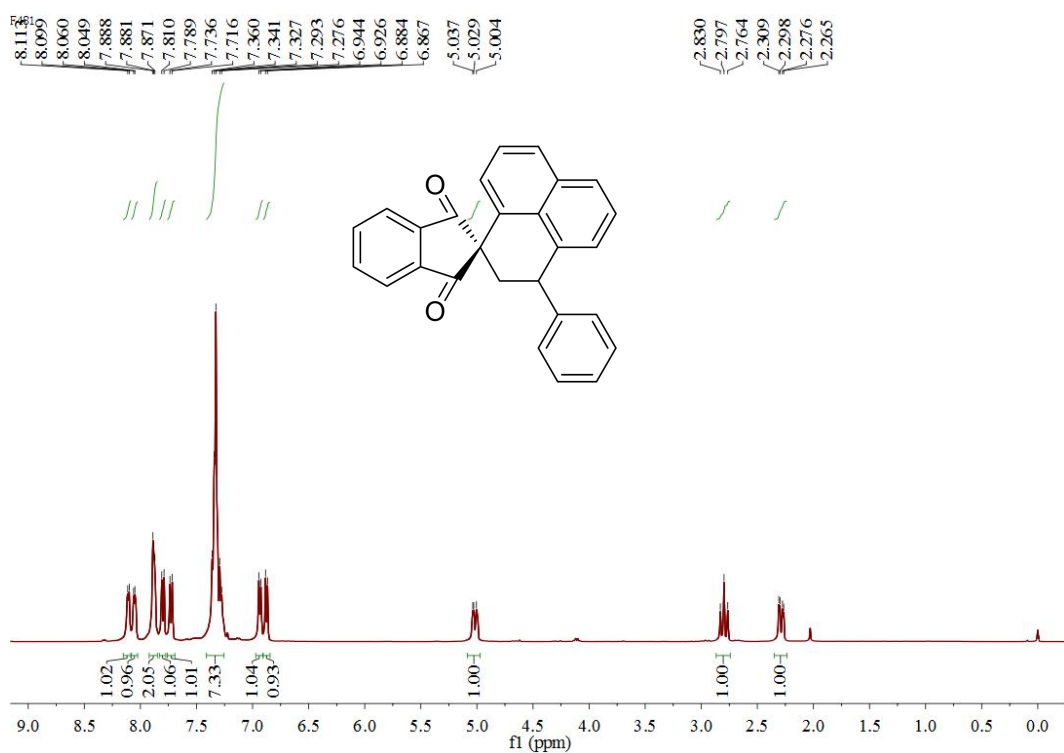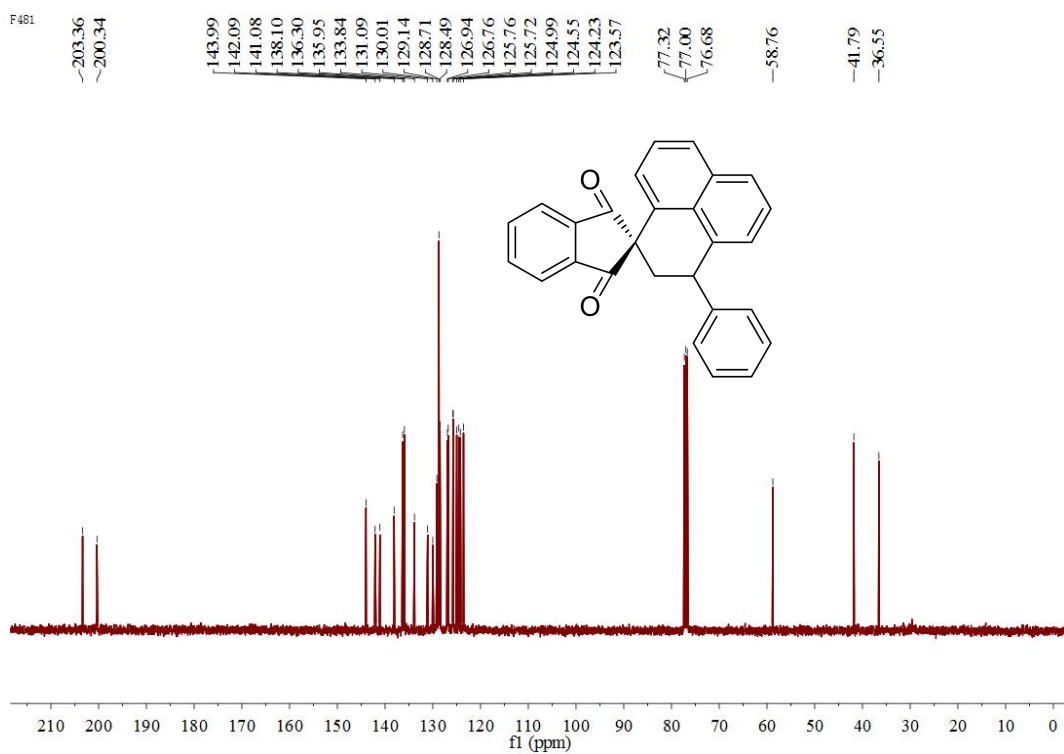

# <sup>1</sup>H NMR and <sup>13</sup>C NMR of 3b

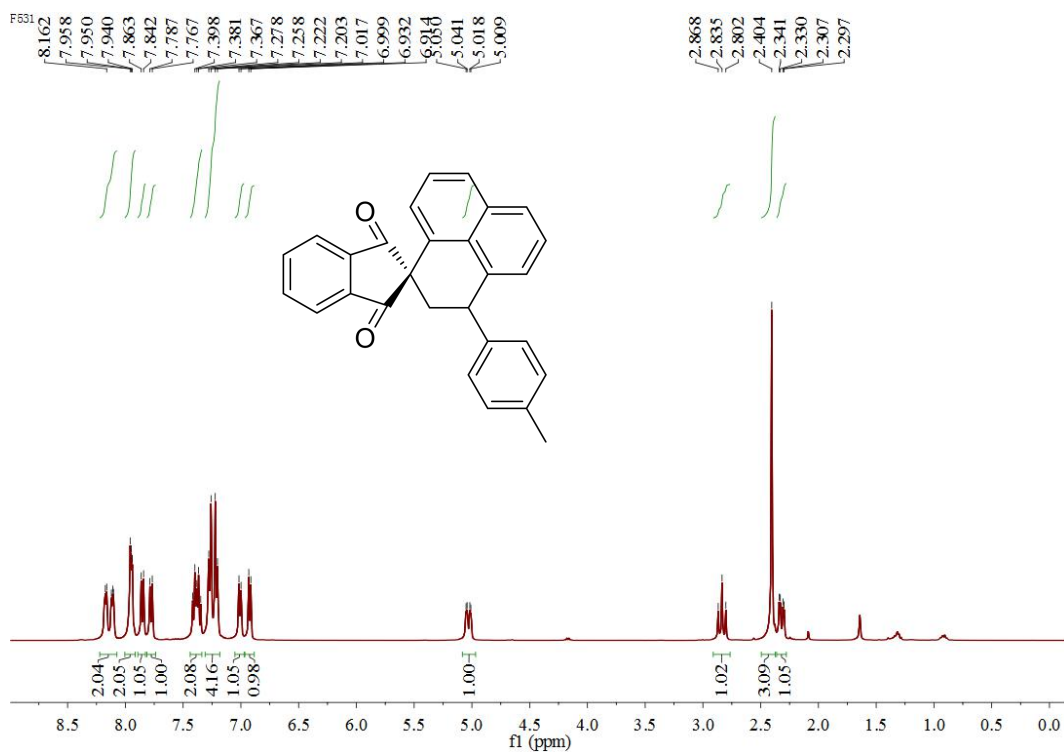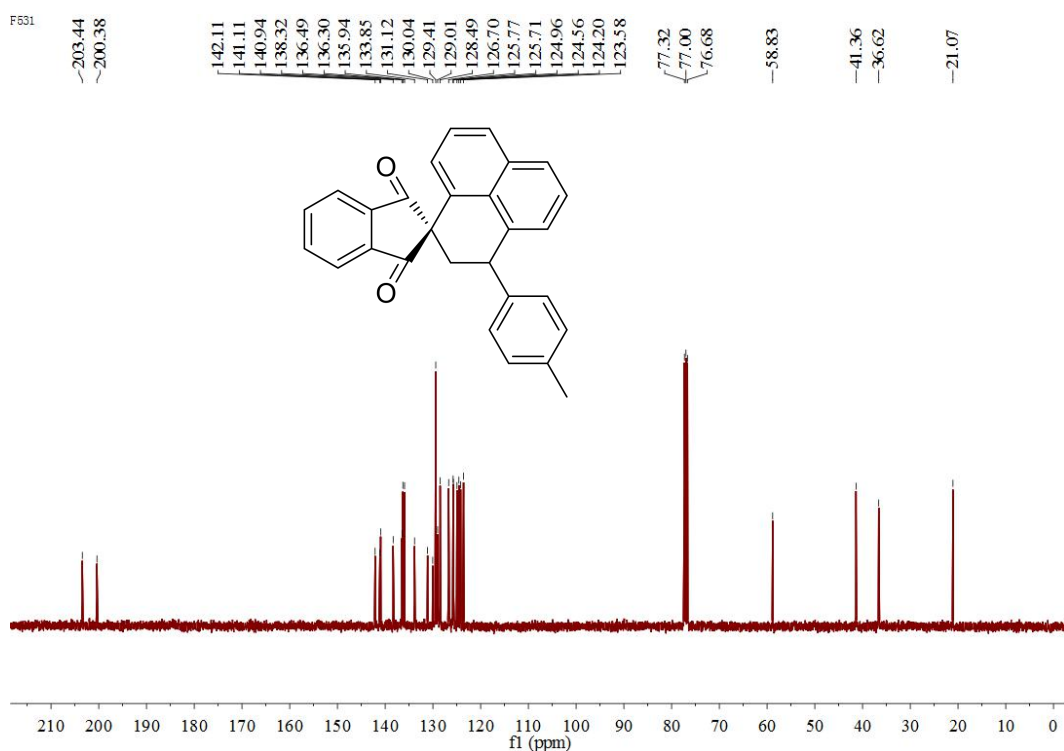

# <sup>1</sup>H NMR and <sup>13</sup>C NMR of 3c

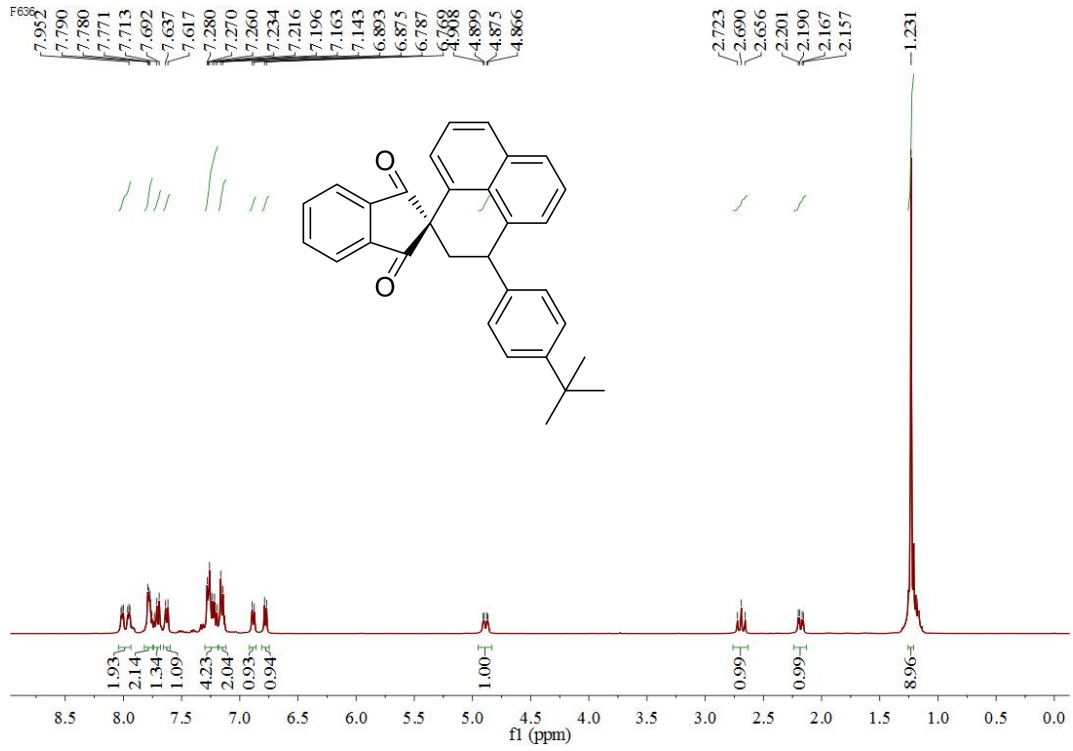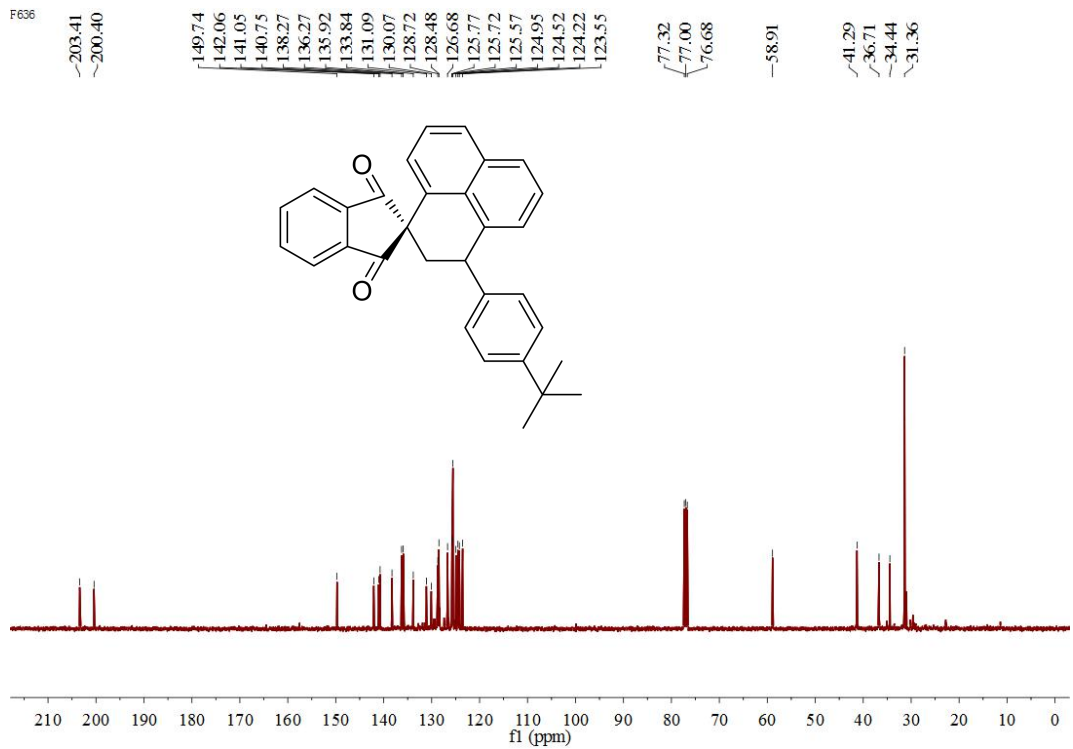

# <sup>1</sup>H NMR and <sup>13</sup>C NMR of 3d

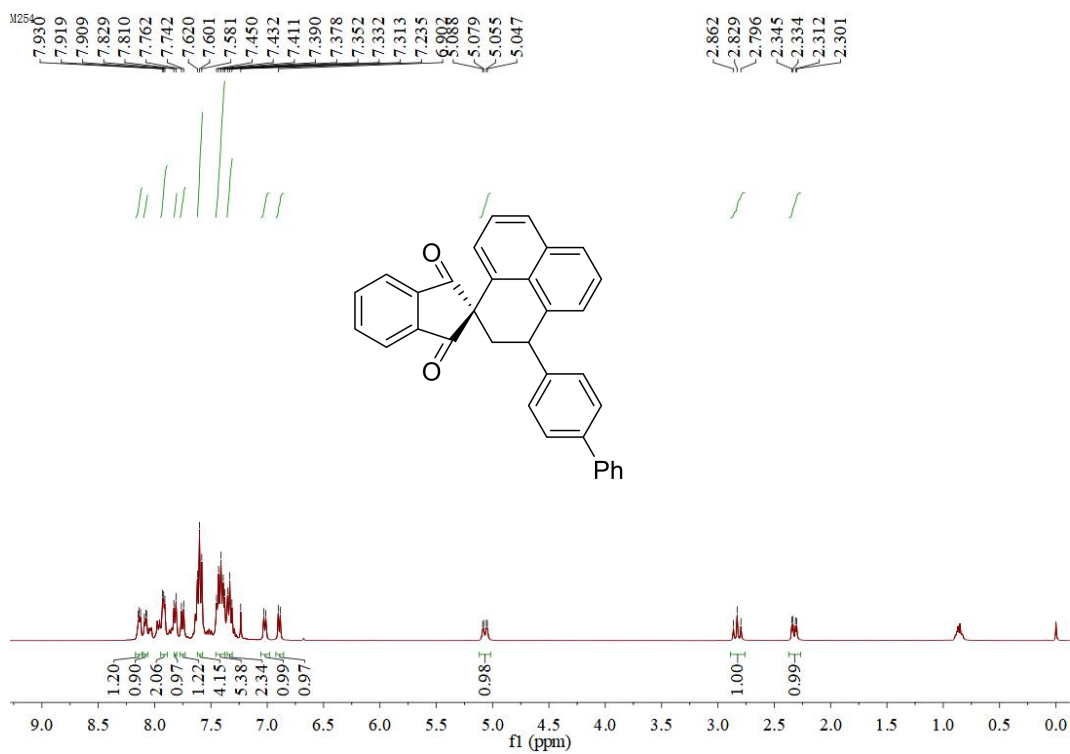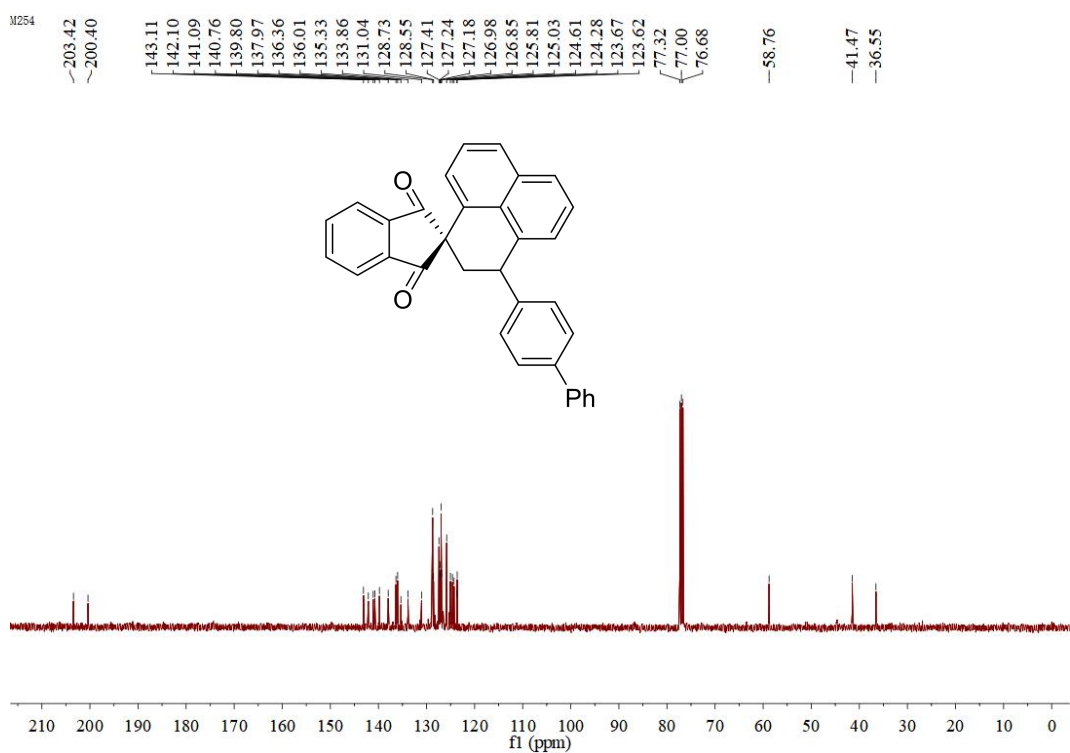

# <sup>1</sup>H NMR and <sup>13</sup>C NMR of 3e

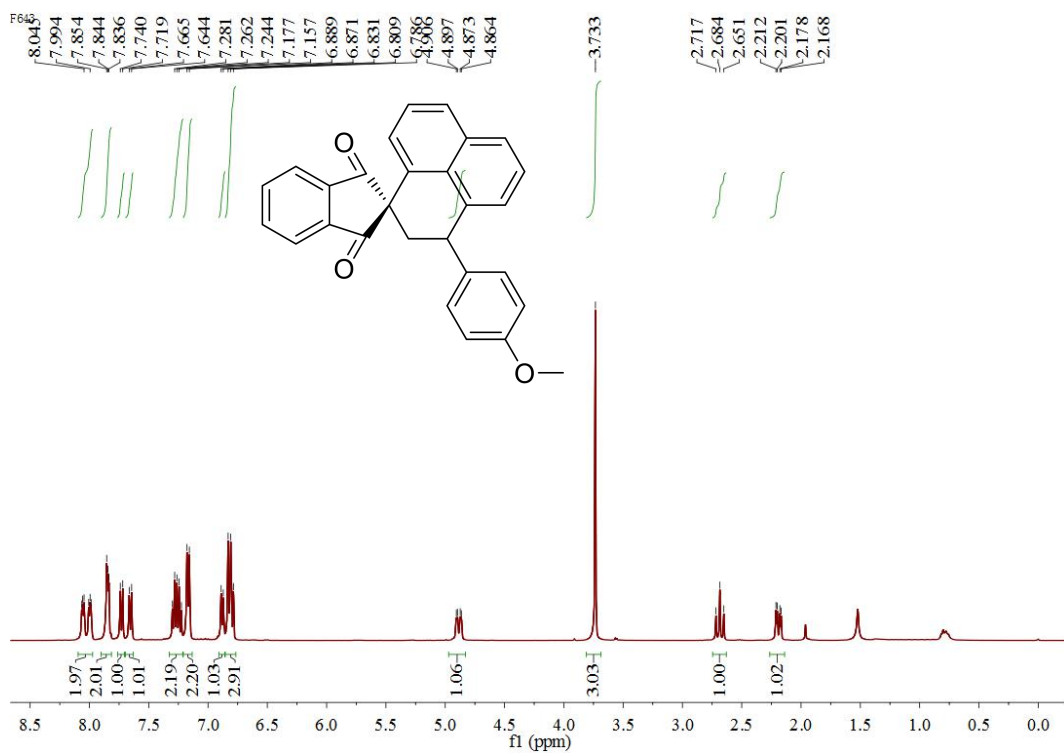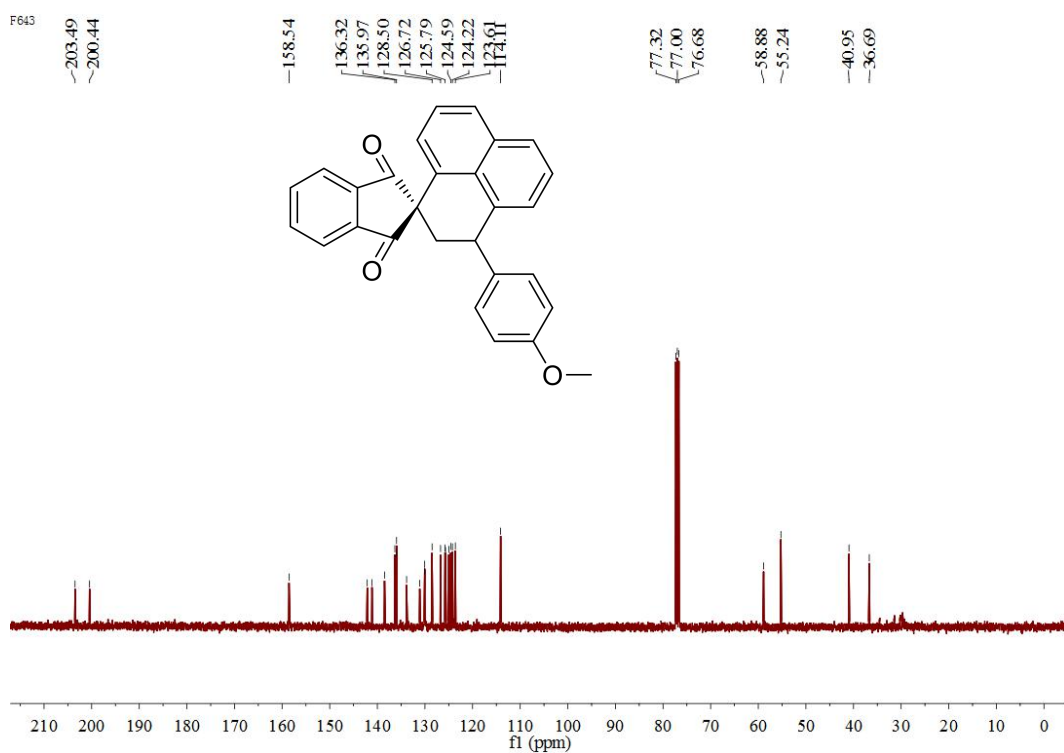

# <sup>1</sup>H NMR and <sup>13</sup>C NMR of 3f

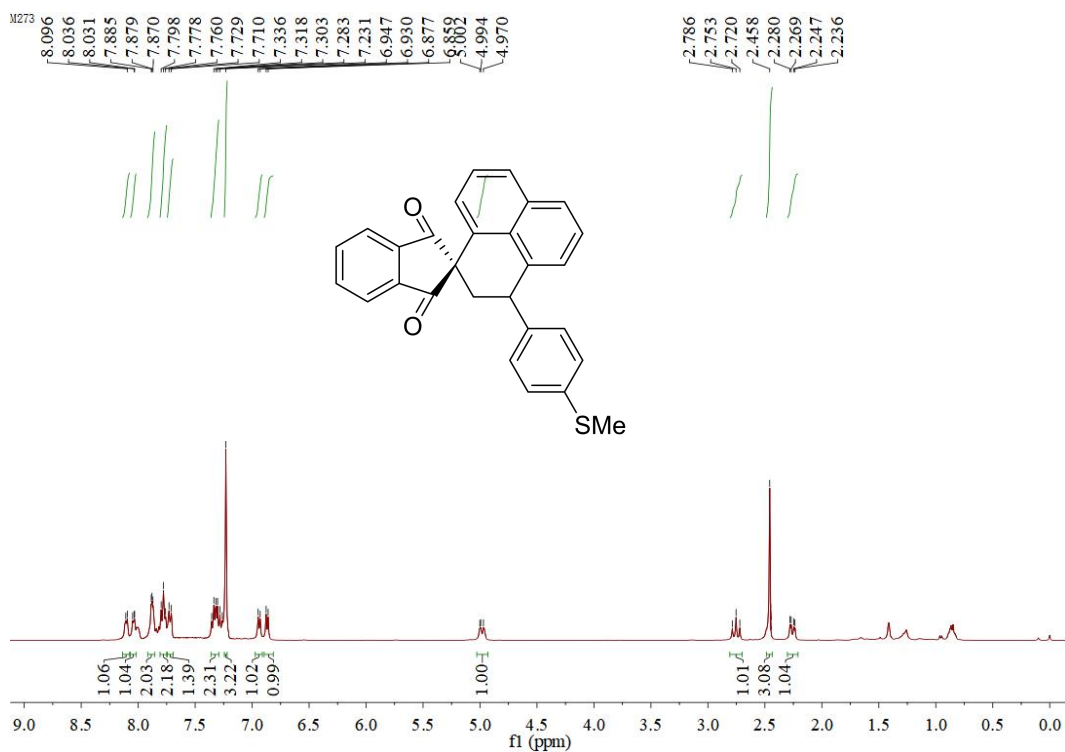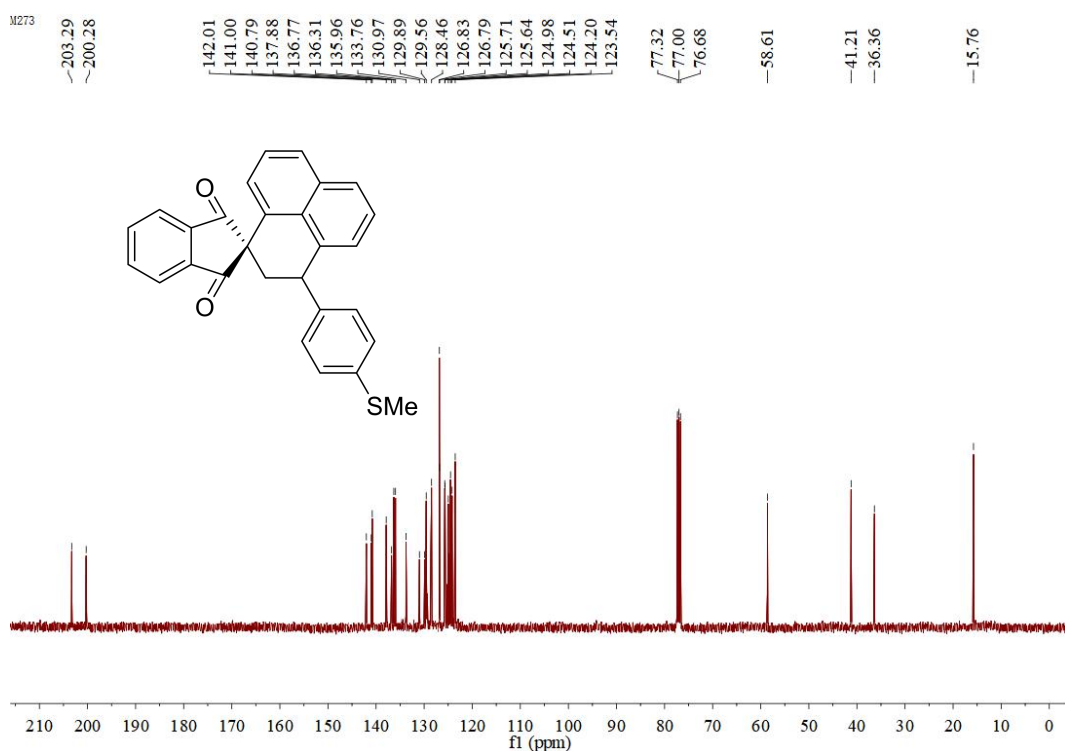

# <sup>1</sup>H NMR, <sup>13</sup>C NMR and <sup>19</sup>F NMR of 3g

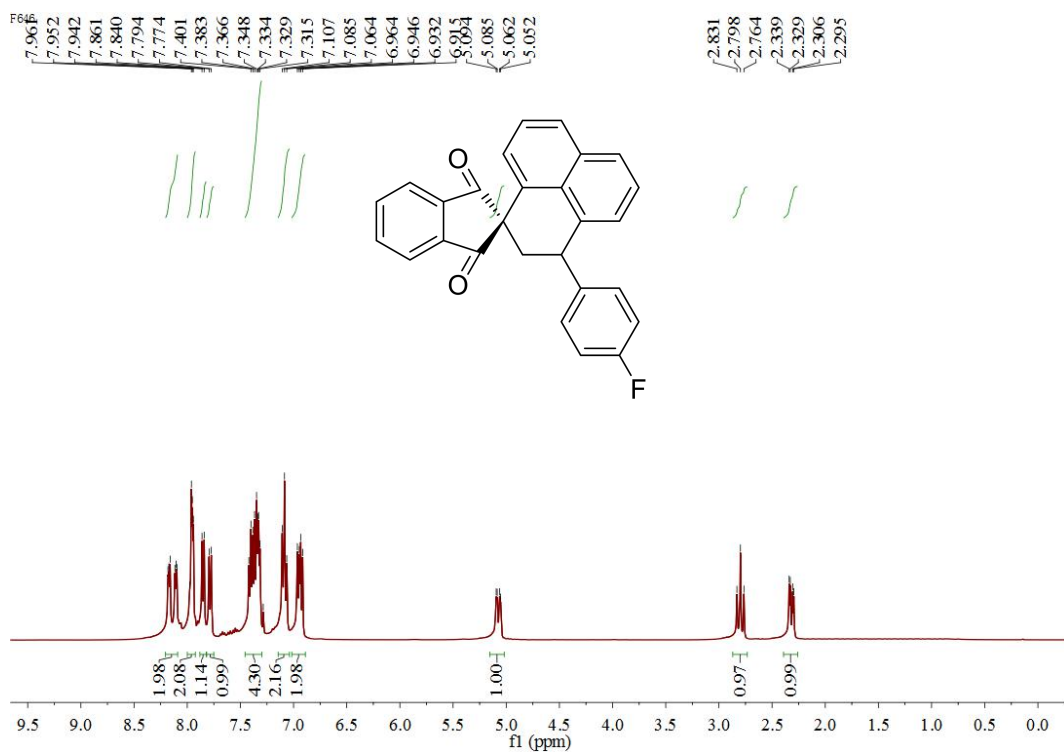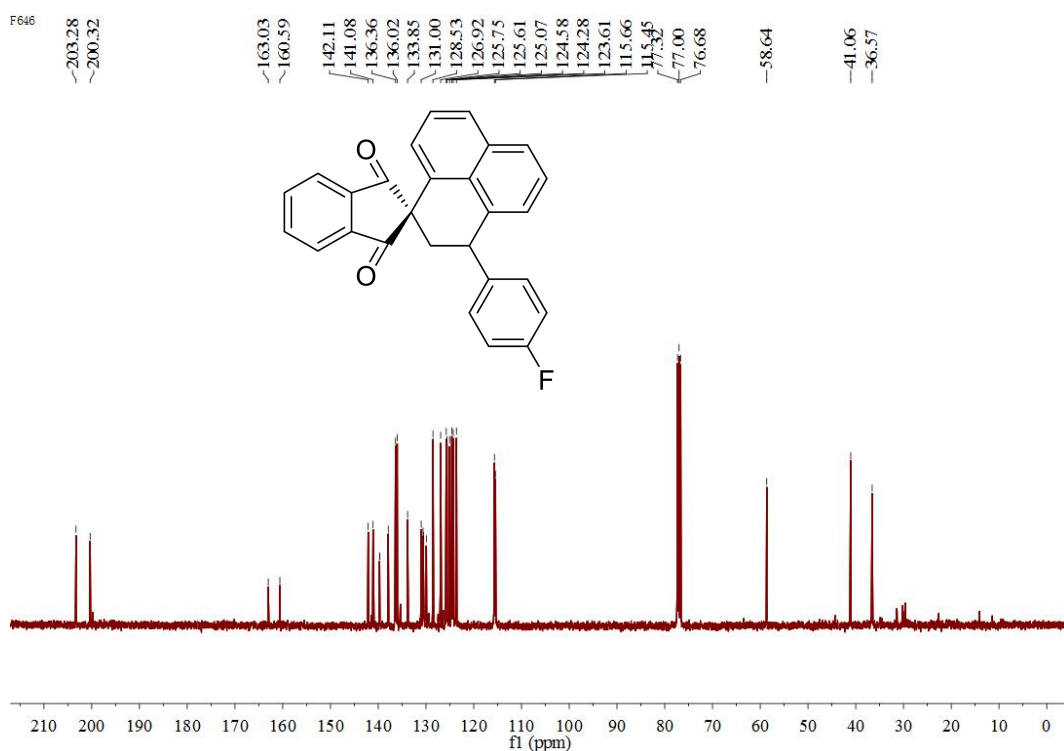

F646

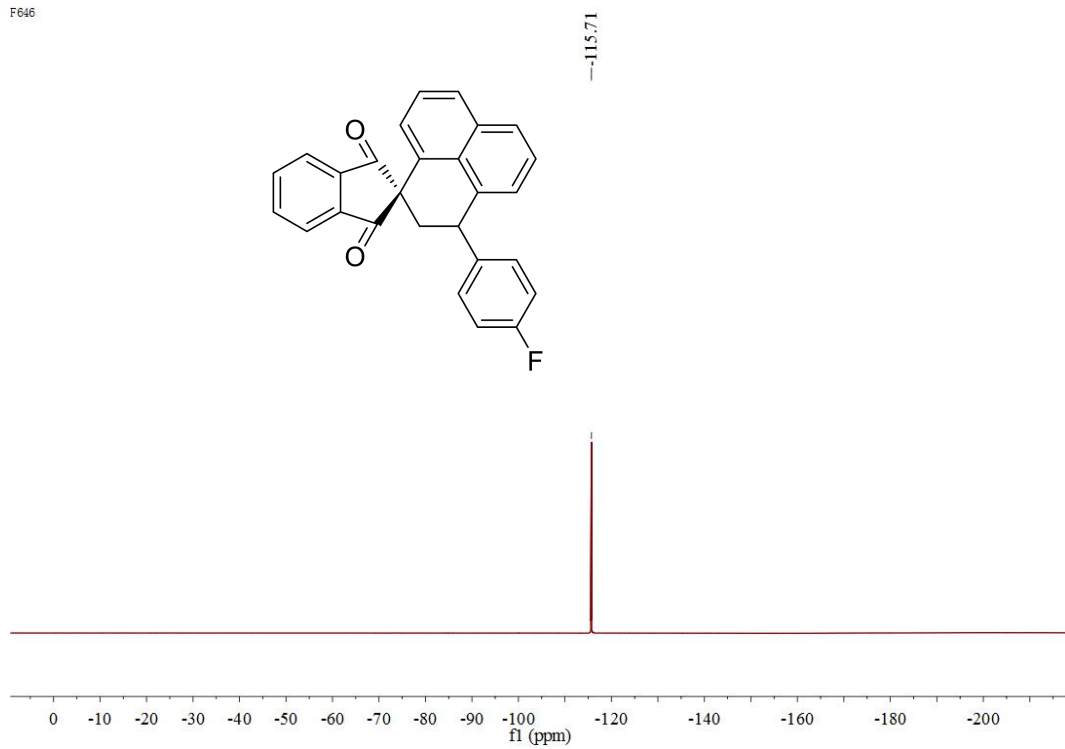



# <sup>1</sup>H NMR and <sup>13</sup>C NMR of 3h

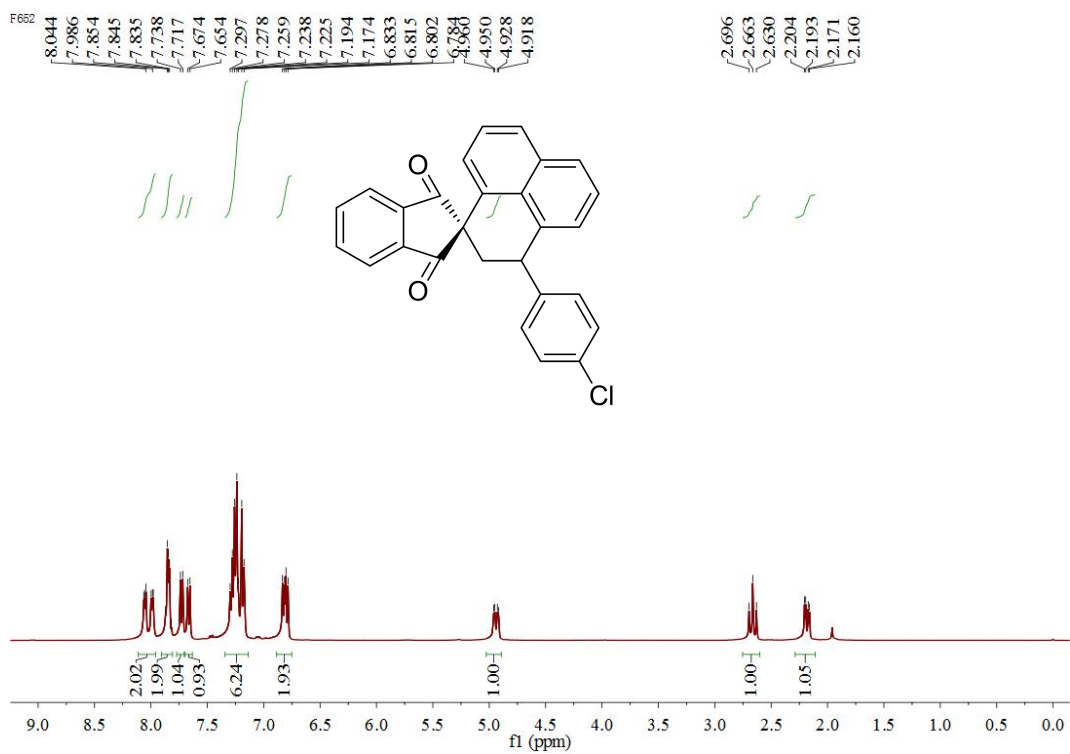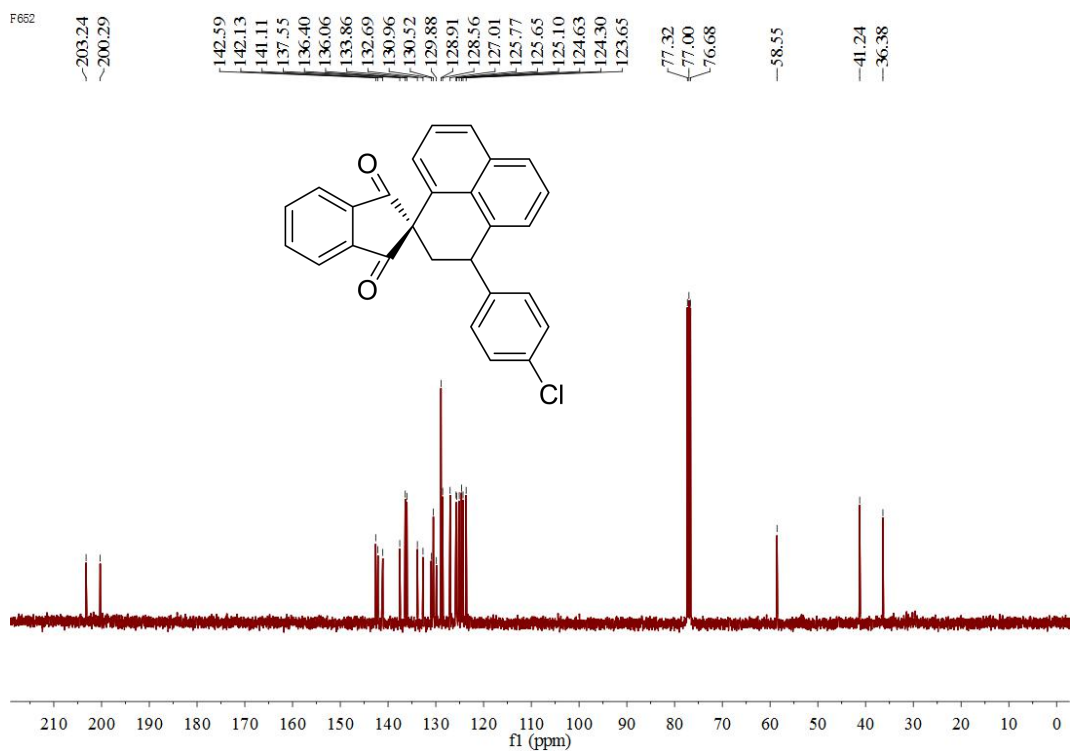

# <sup>1</sup>H NMR and <sup>13</sup>C NMR of 3i

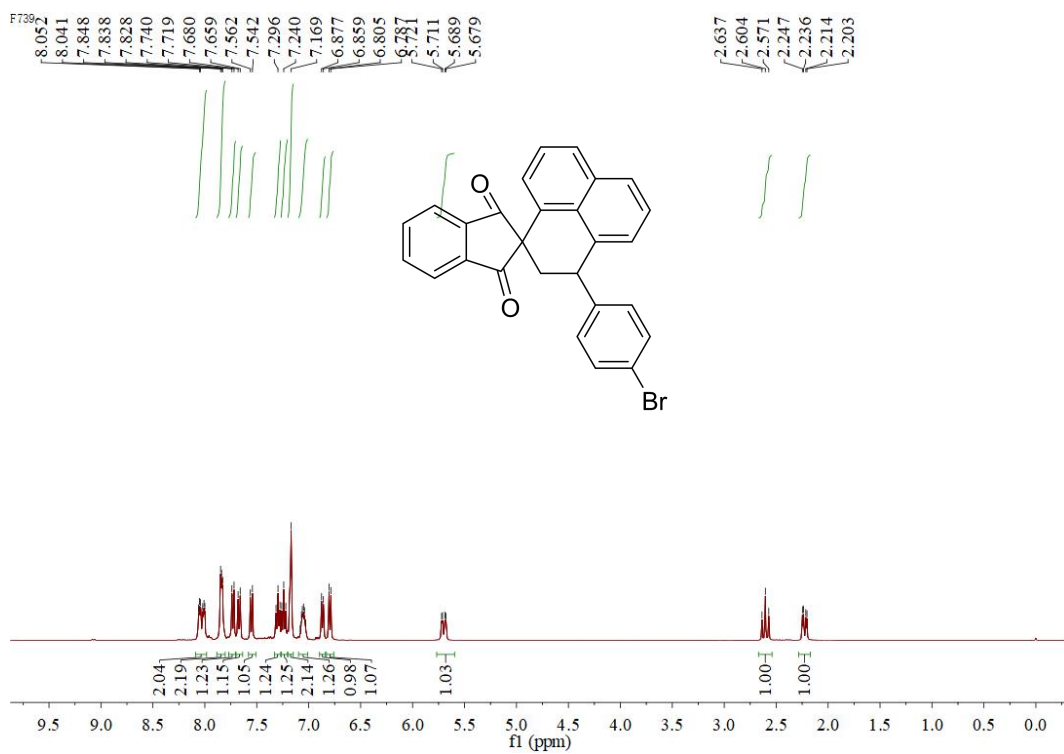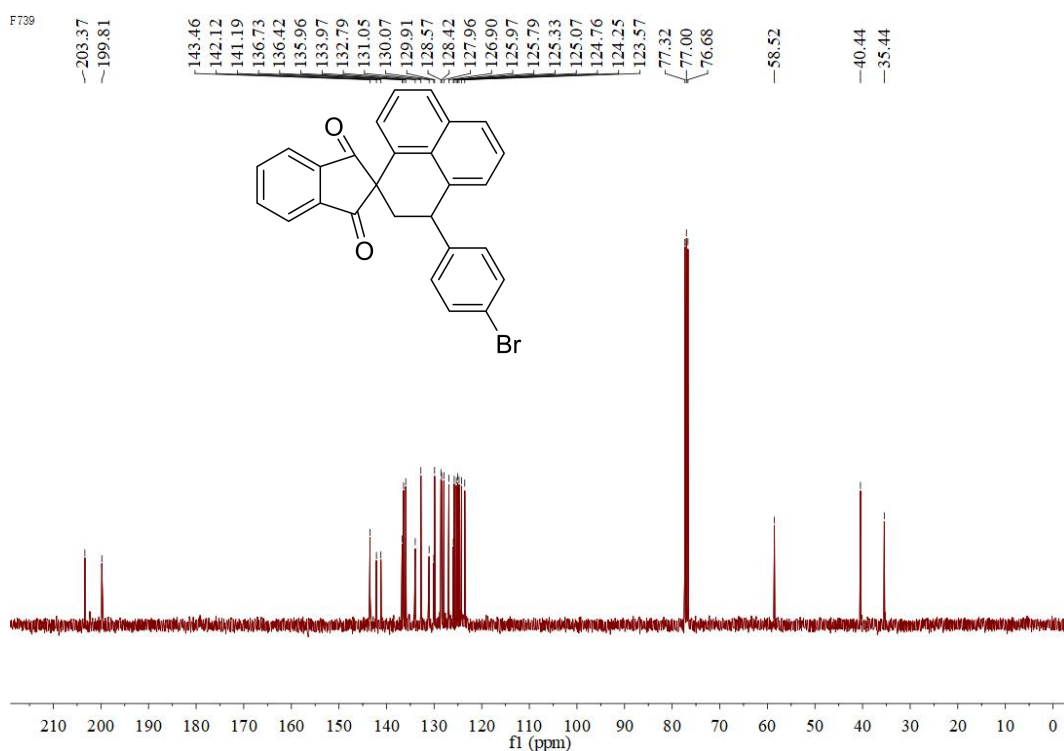

# <sup>1</sup>H NMR and <sup>13</sup>C NMR of 3j

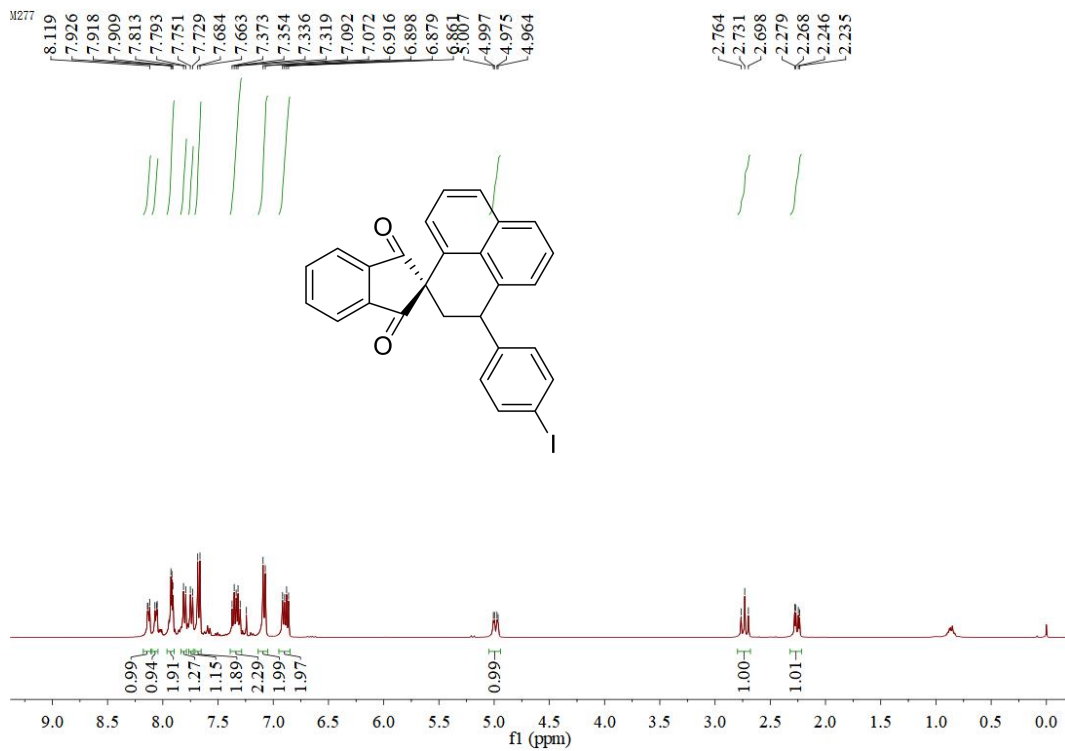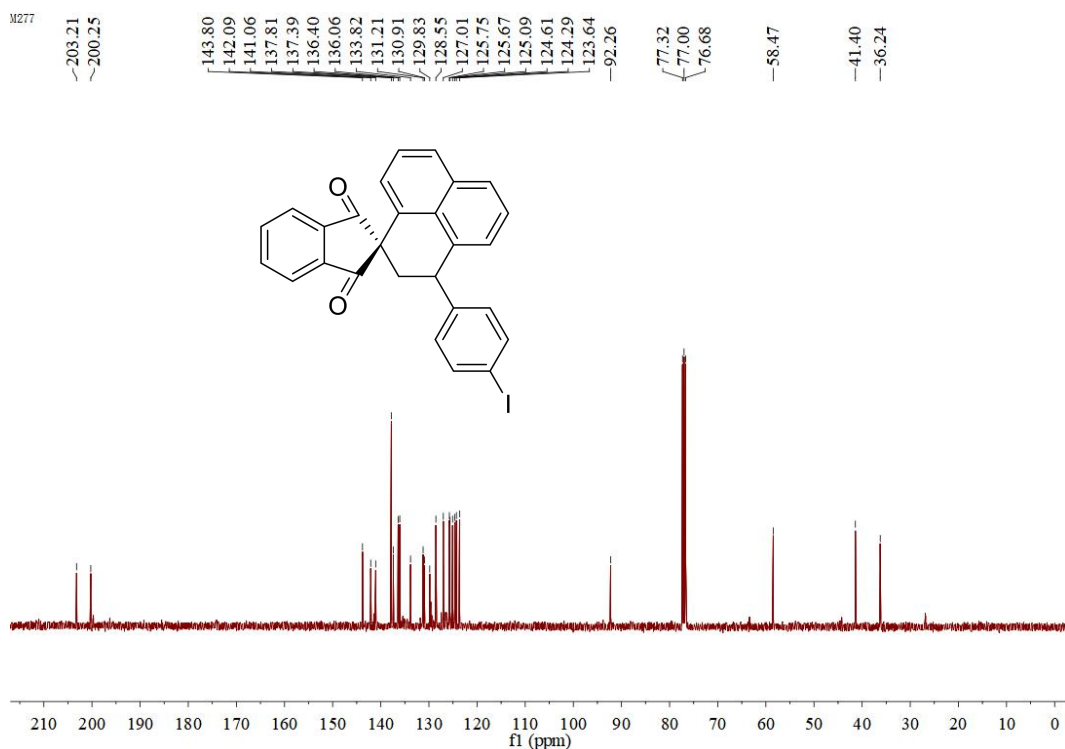

# <sup>1</sup>H NMR, <sup>13</sup>C NMR and <sup>19</sup>F NMR of 3k

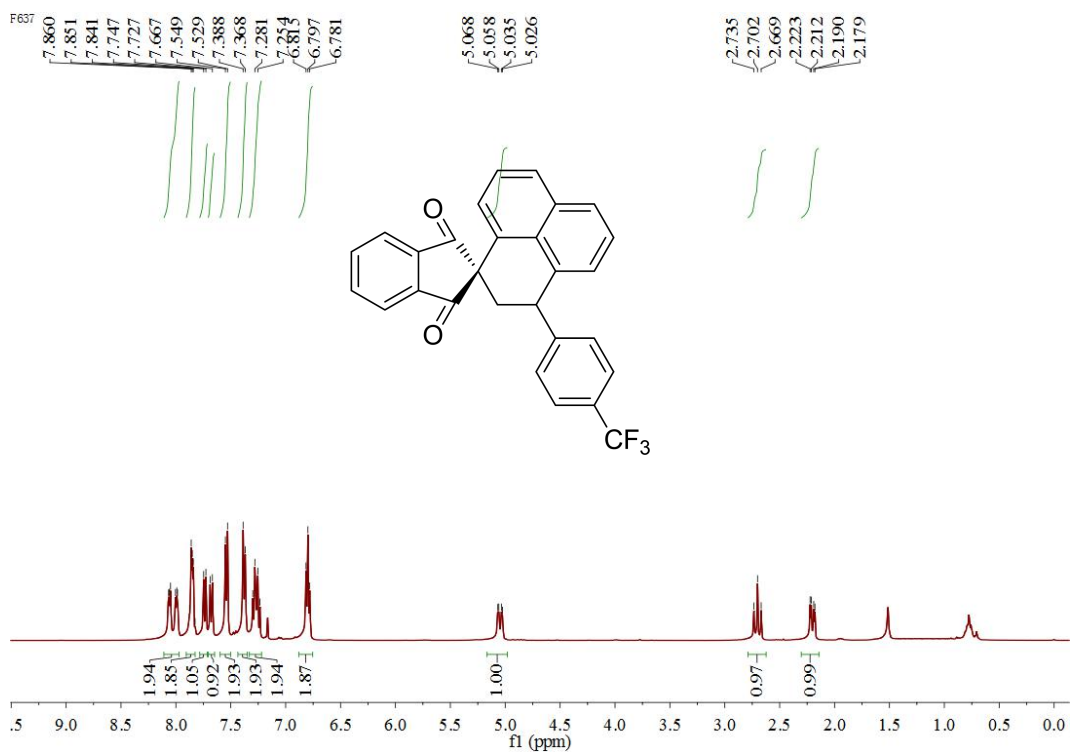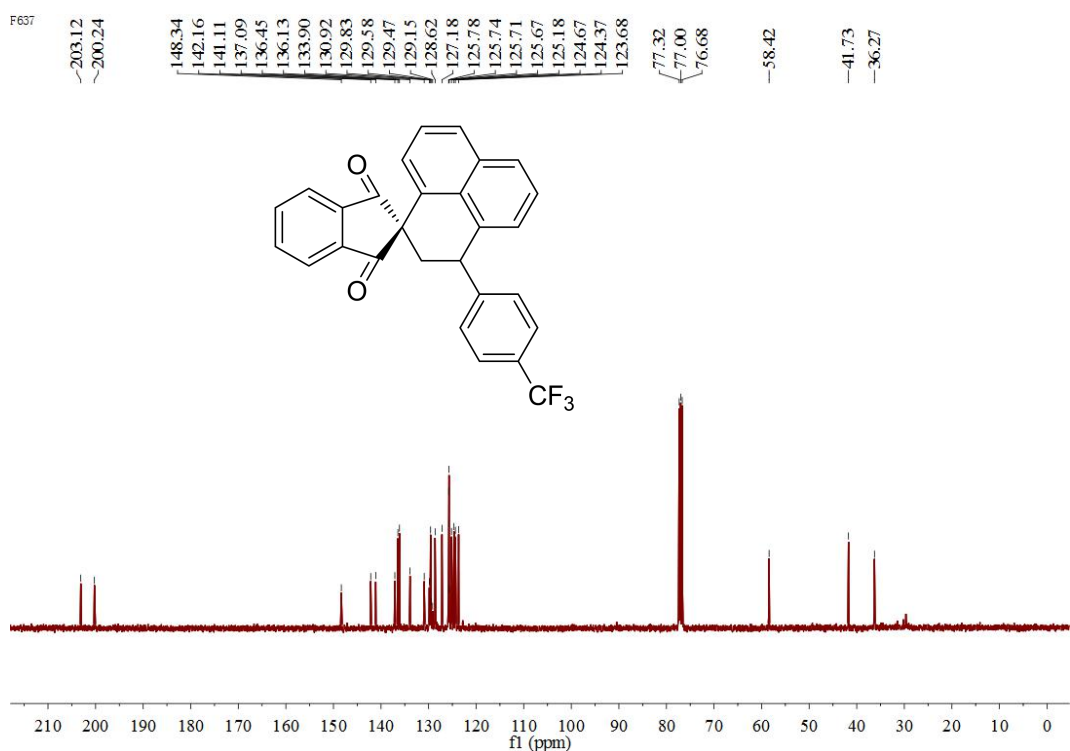

F637

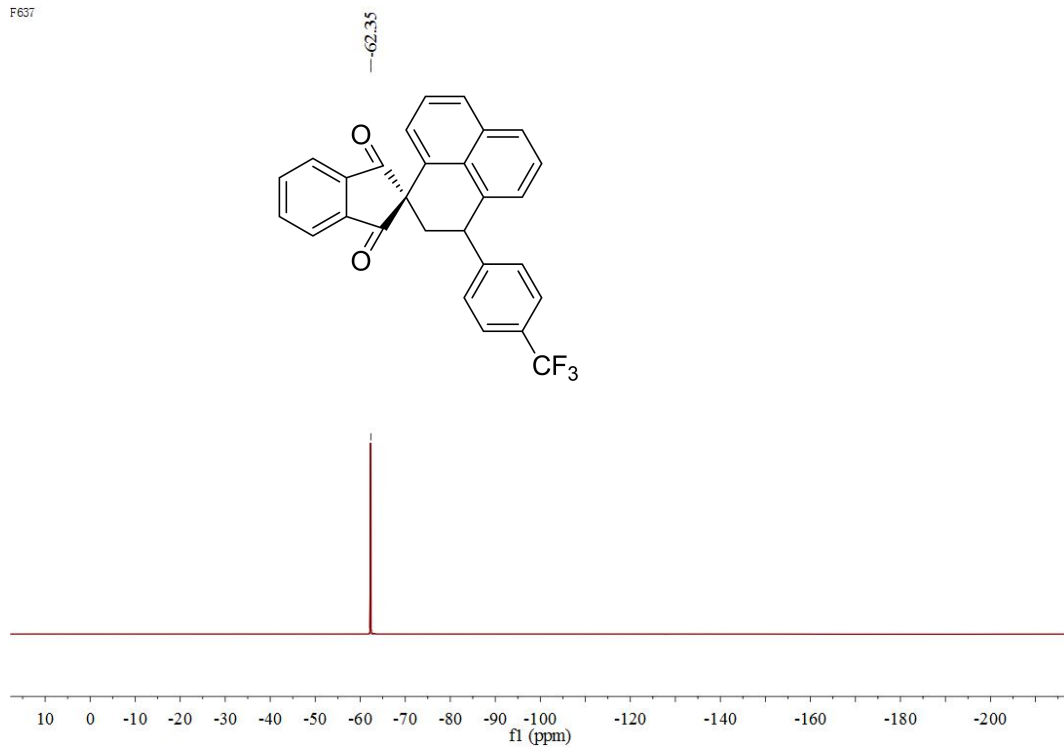

# <sup>1</sup>H NMR and <sup>13</sup>C NMR of 3l

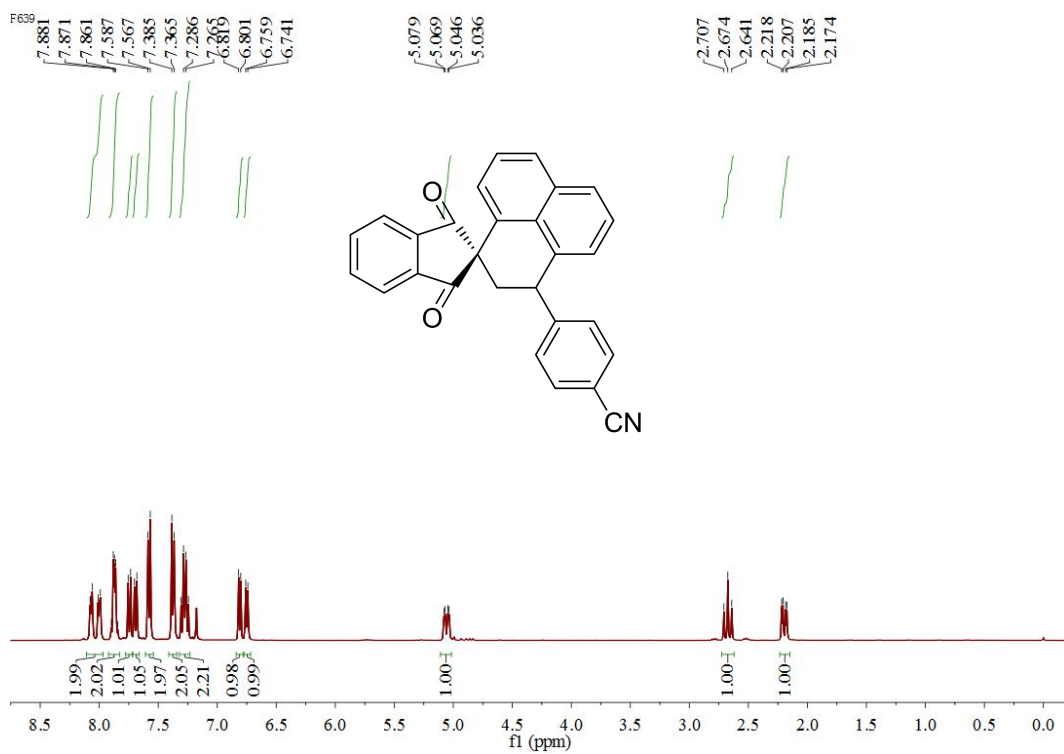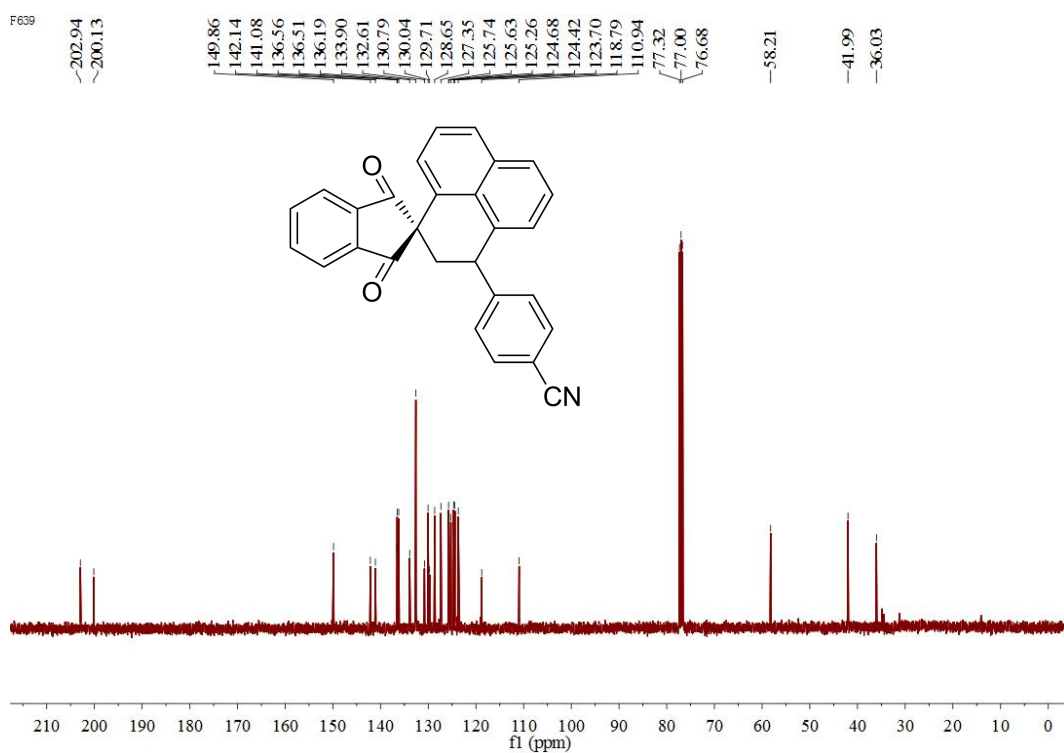

# <sup>1</sup>H NMR and <sup>13</sup>C NMR of 3m

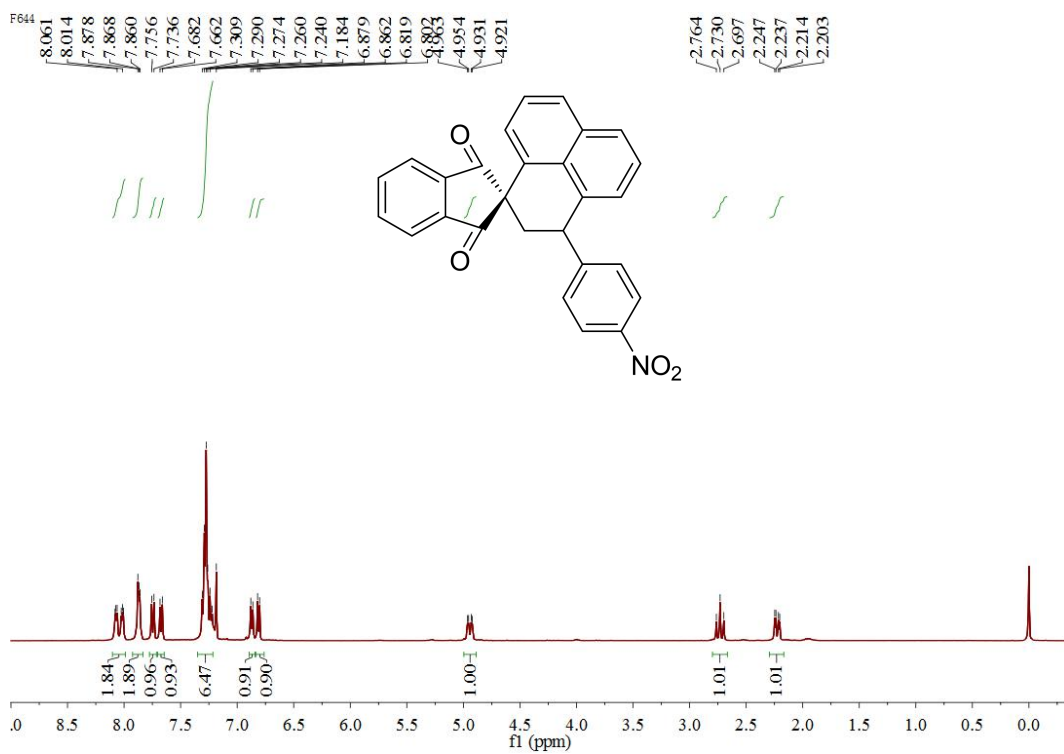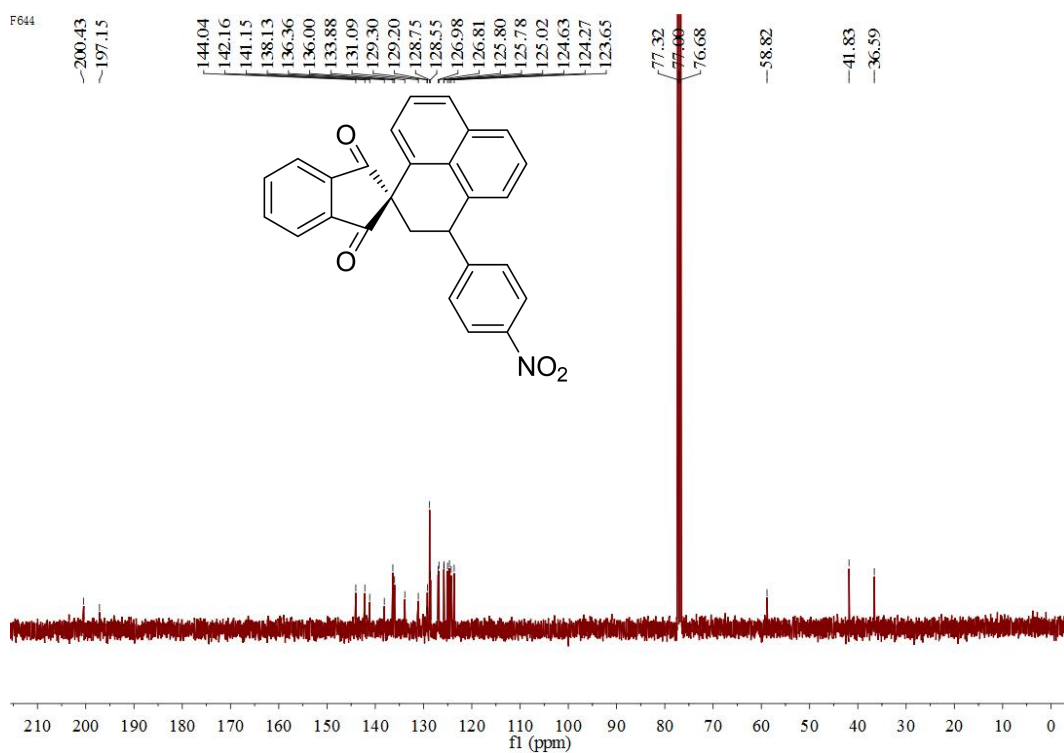

# <sup>1</sup>H NMR and <sup>13</sup>C NMR of 3n

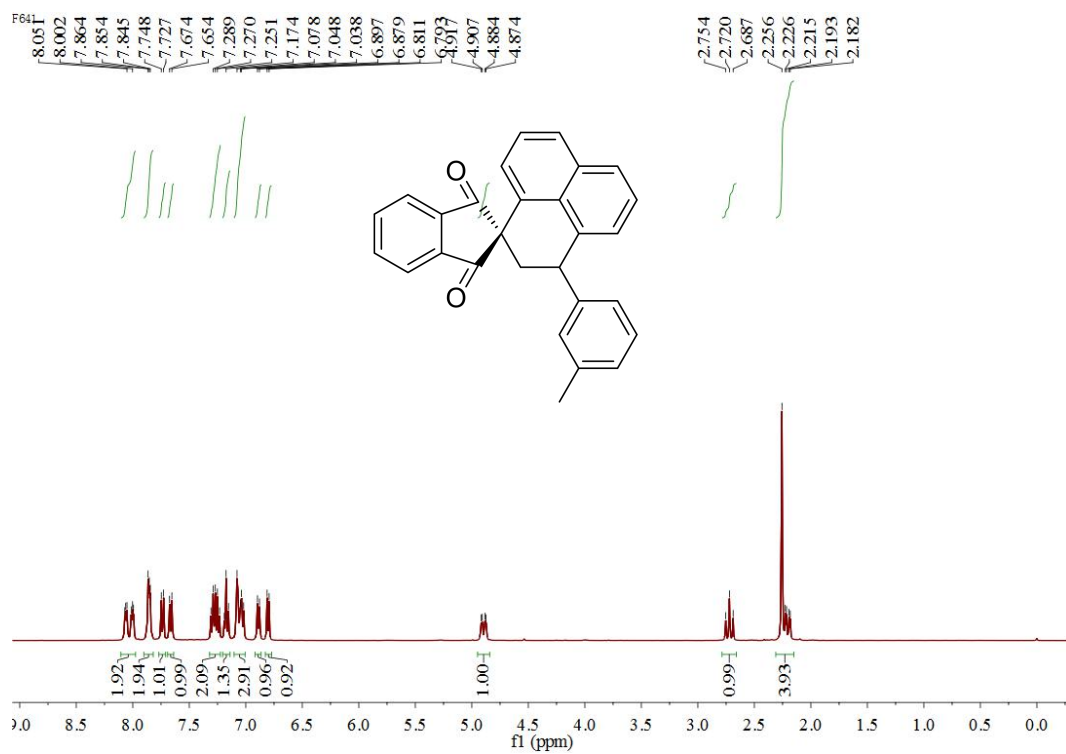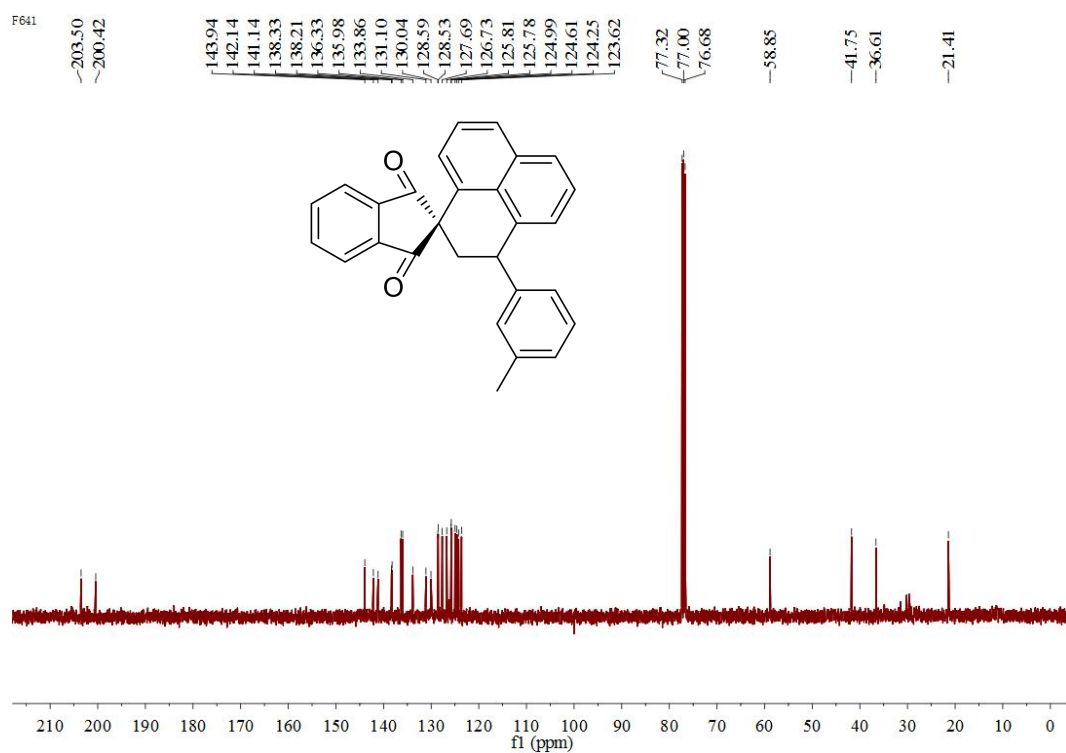



# <sup>1</sup>H NMR, <sup>13</sup>C NMR and <sup>19</sup>F NMR of 3o

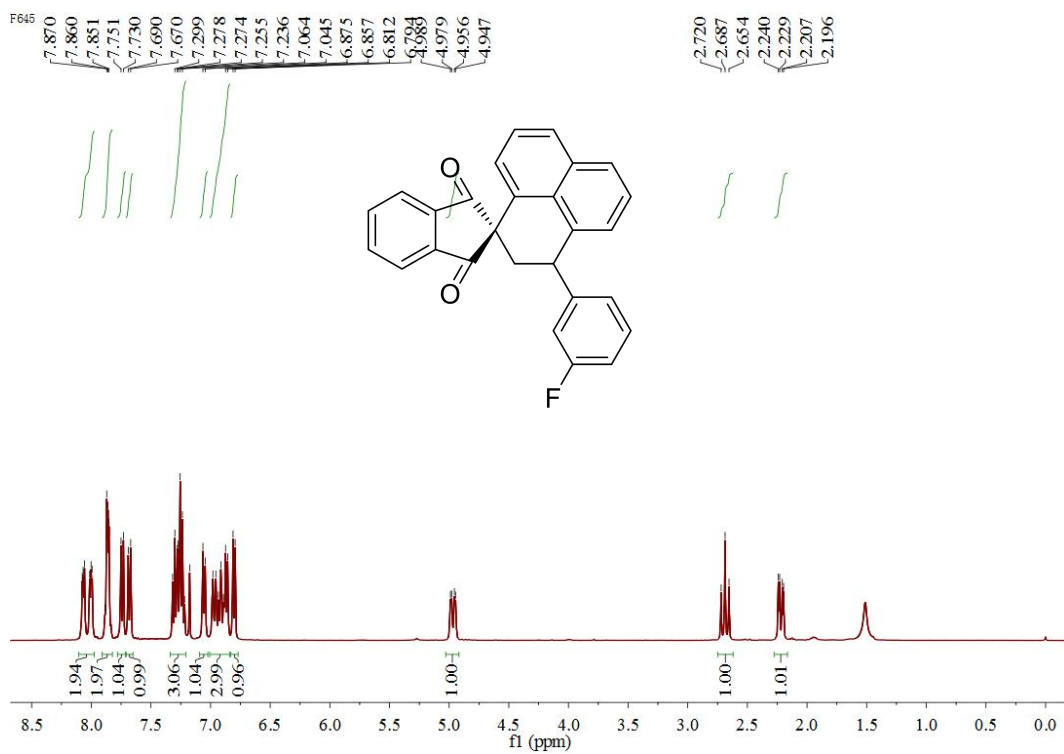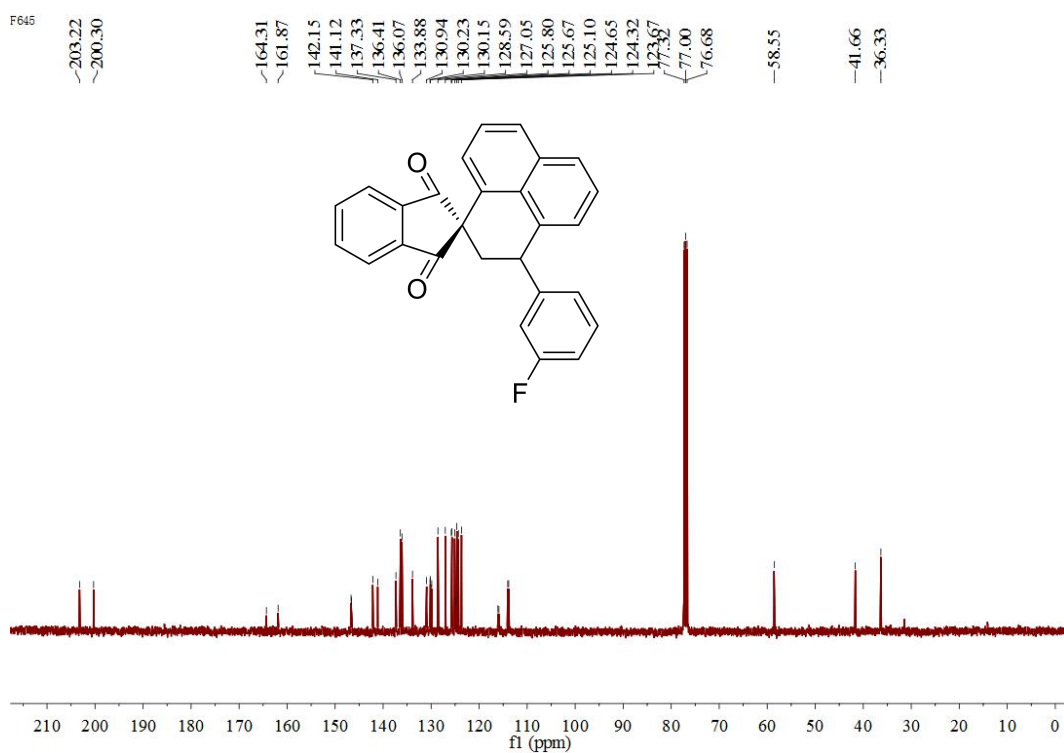

F645

--112.77

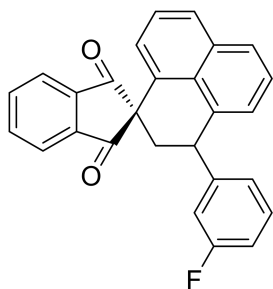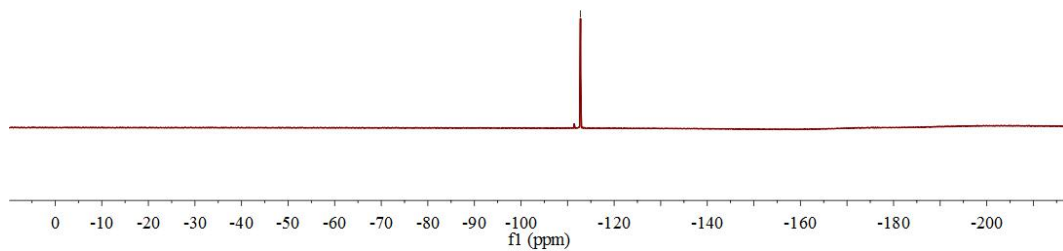

# <sup>1</sup>H NMR and <sup>13</sup>C NMR of 3p

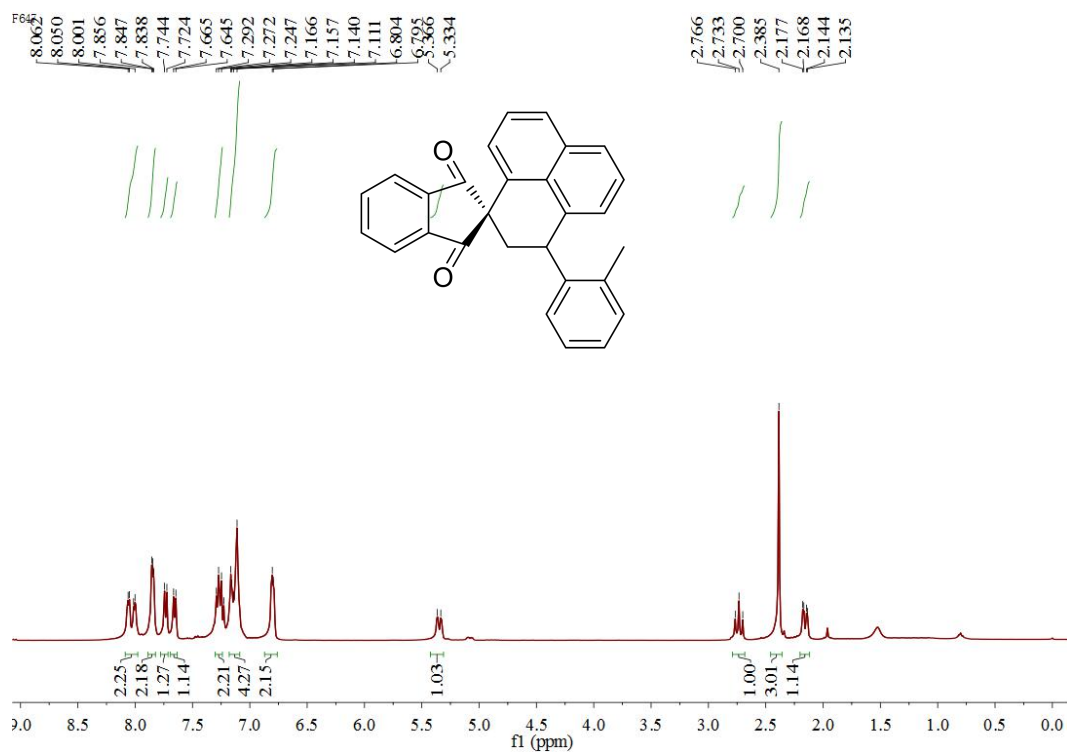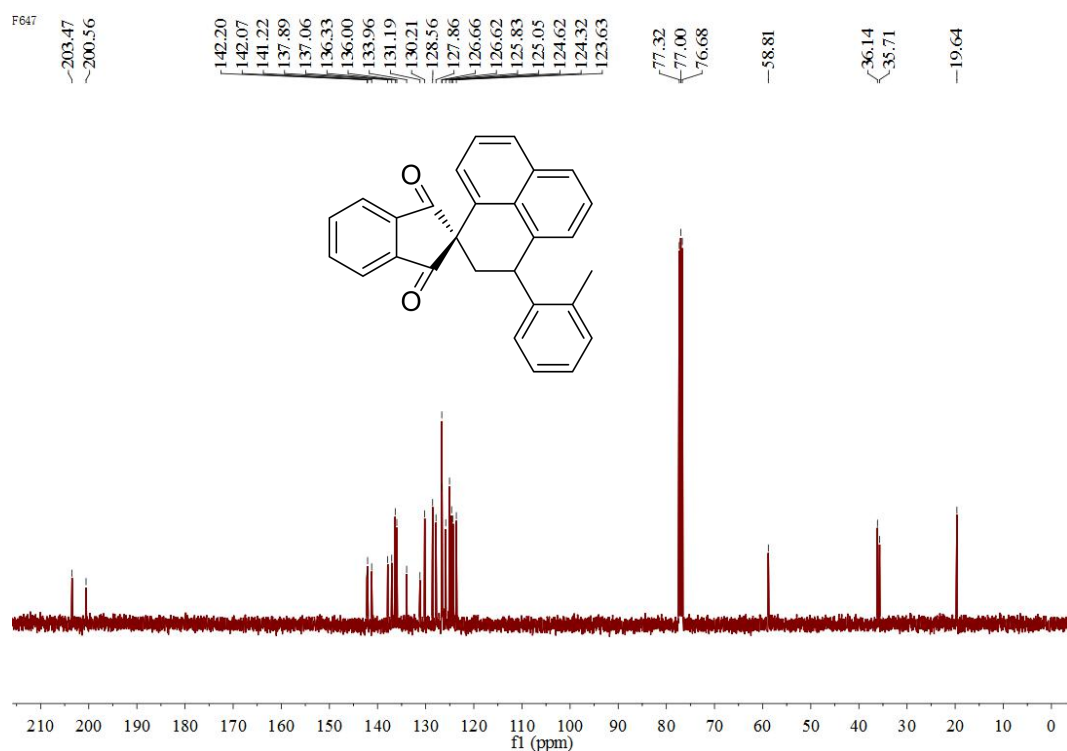

# <sup>1</sup>H NMR and <sup>13</sup>C NMR of 3q

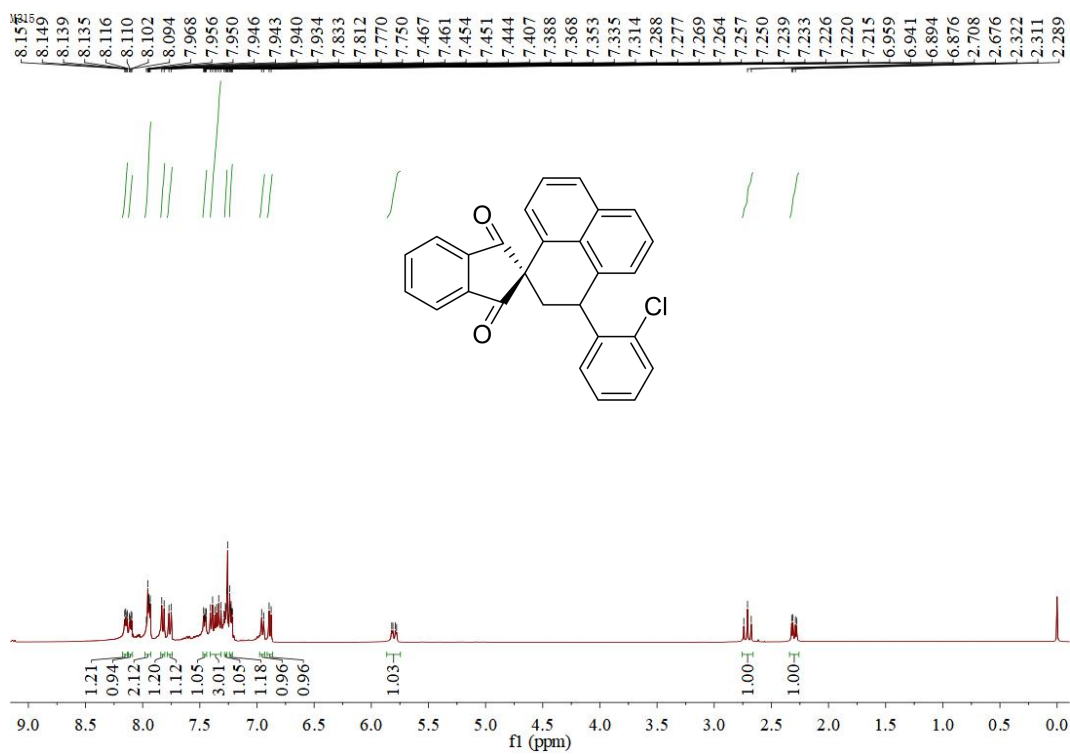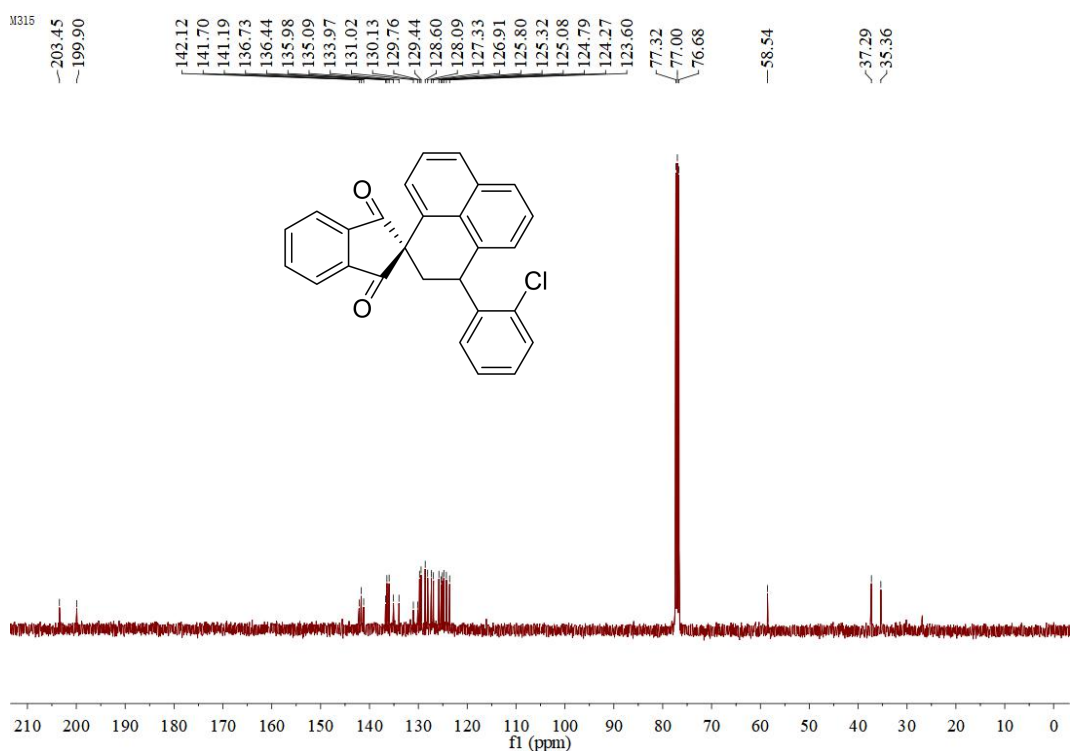

# <sup>1</sup>H NMR and <sup>13</sup>C NMR of 3r

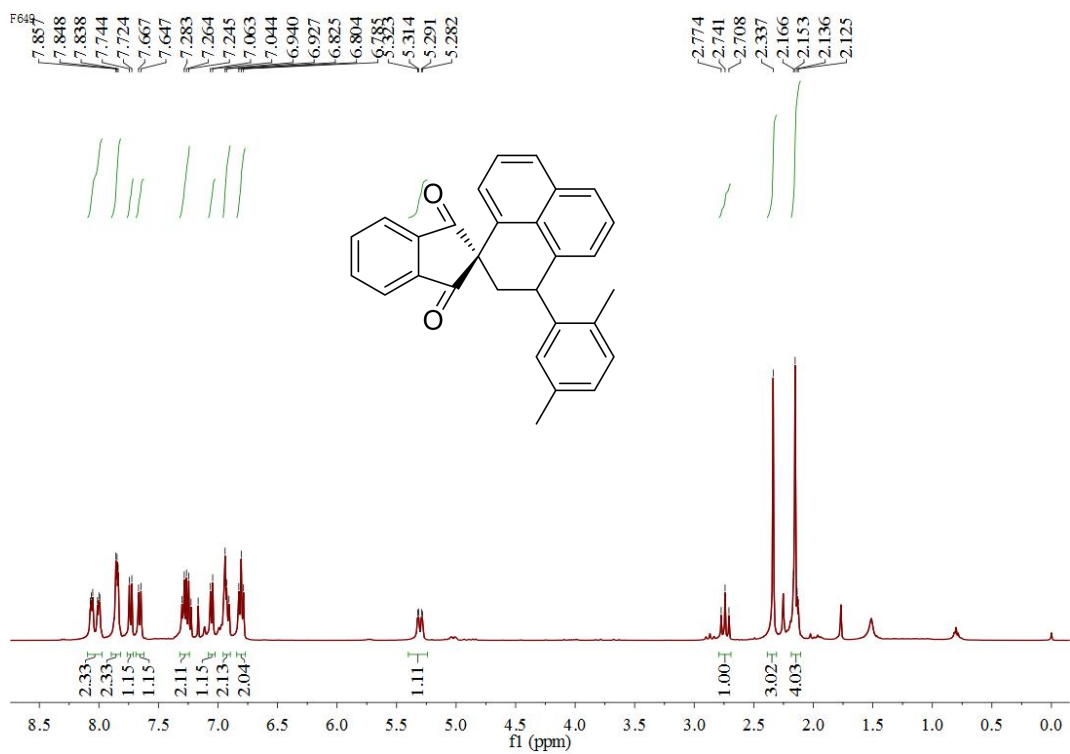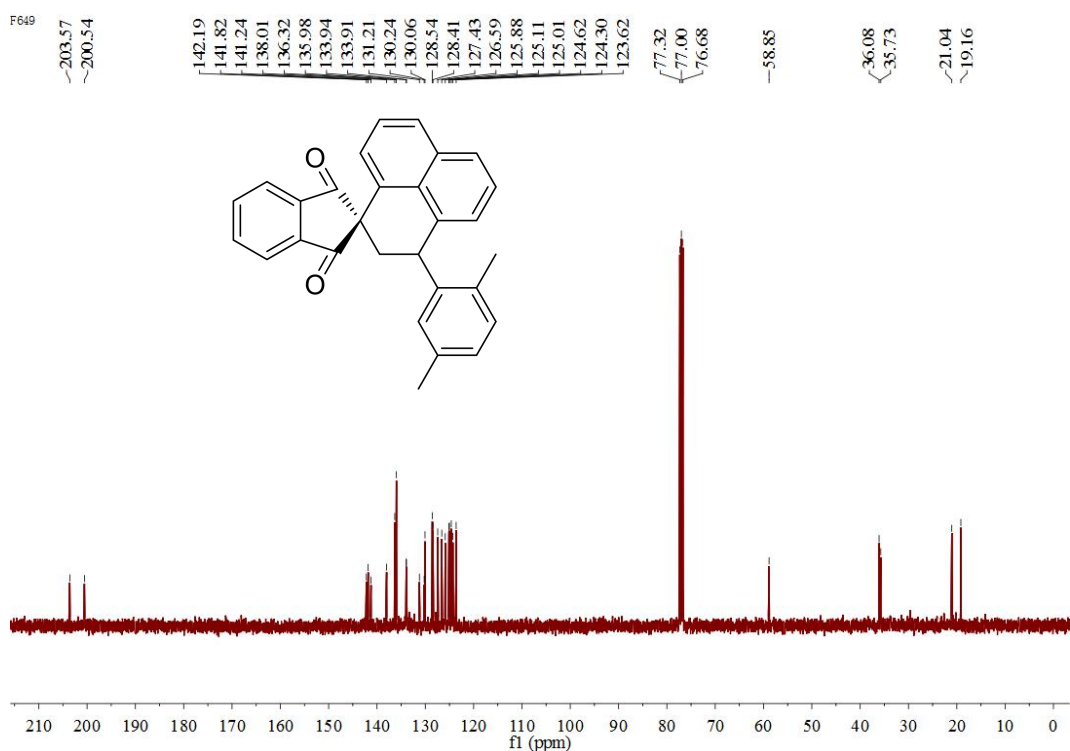

# <sup>1</sup>H NMR and <sup>13</sup>C NMR of 3s

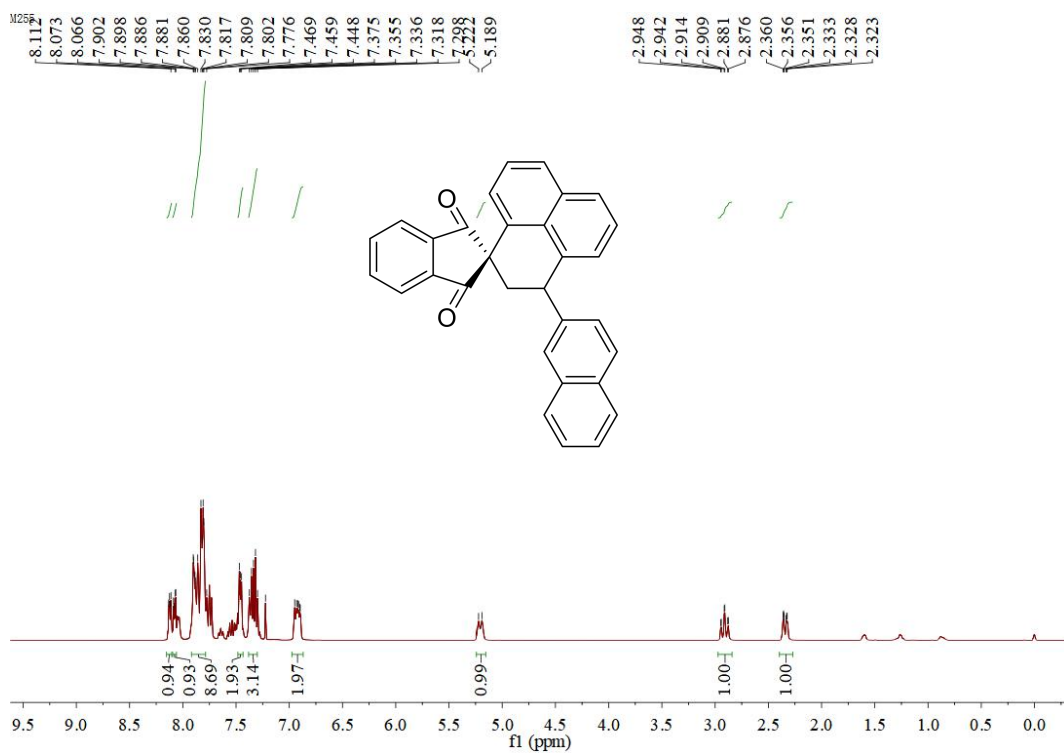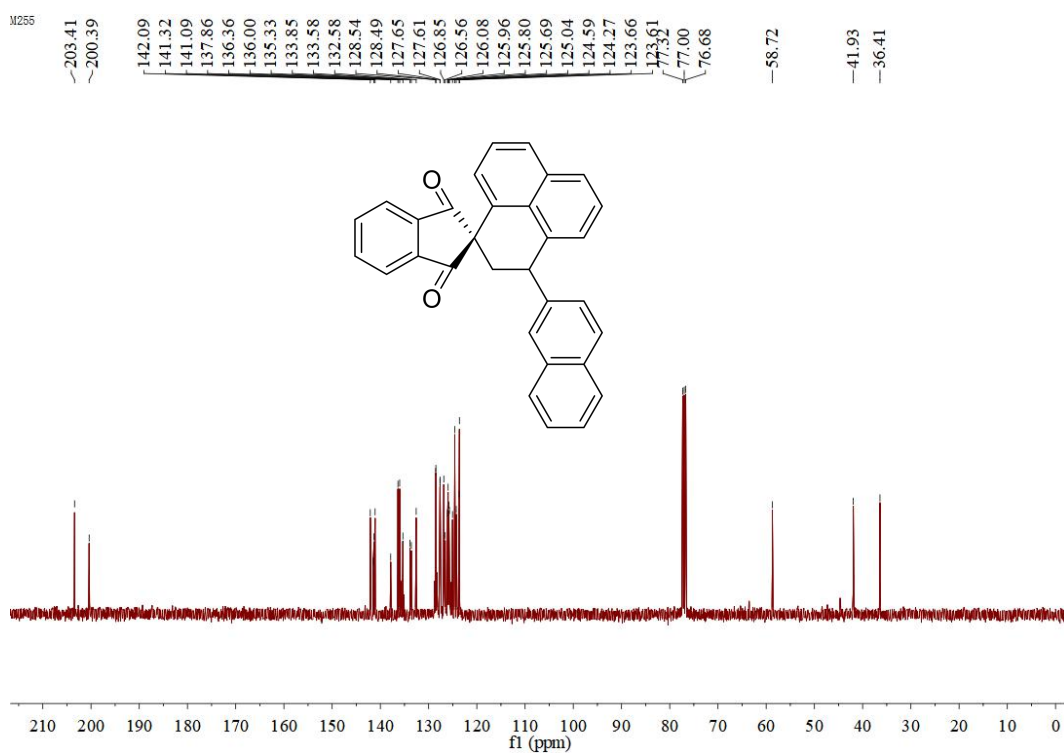

# <sup>1</sup>H NMR and <sup>13</sup>C NMR of 3t

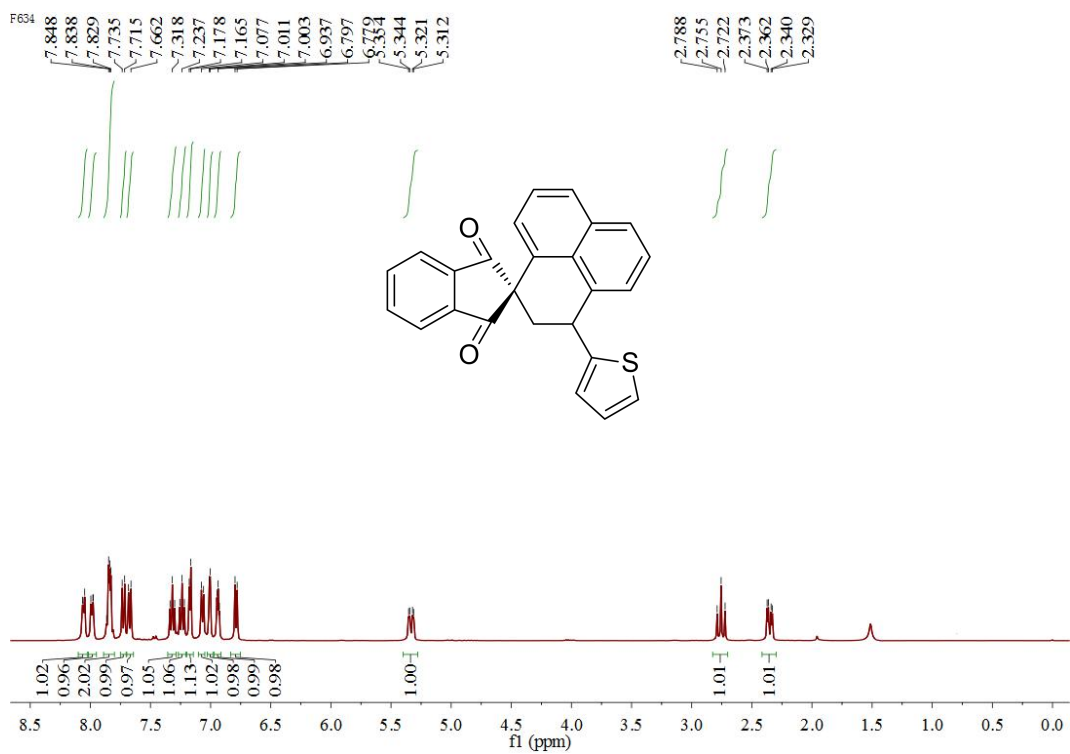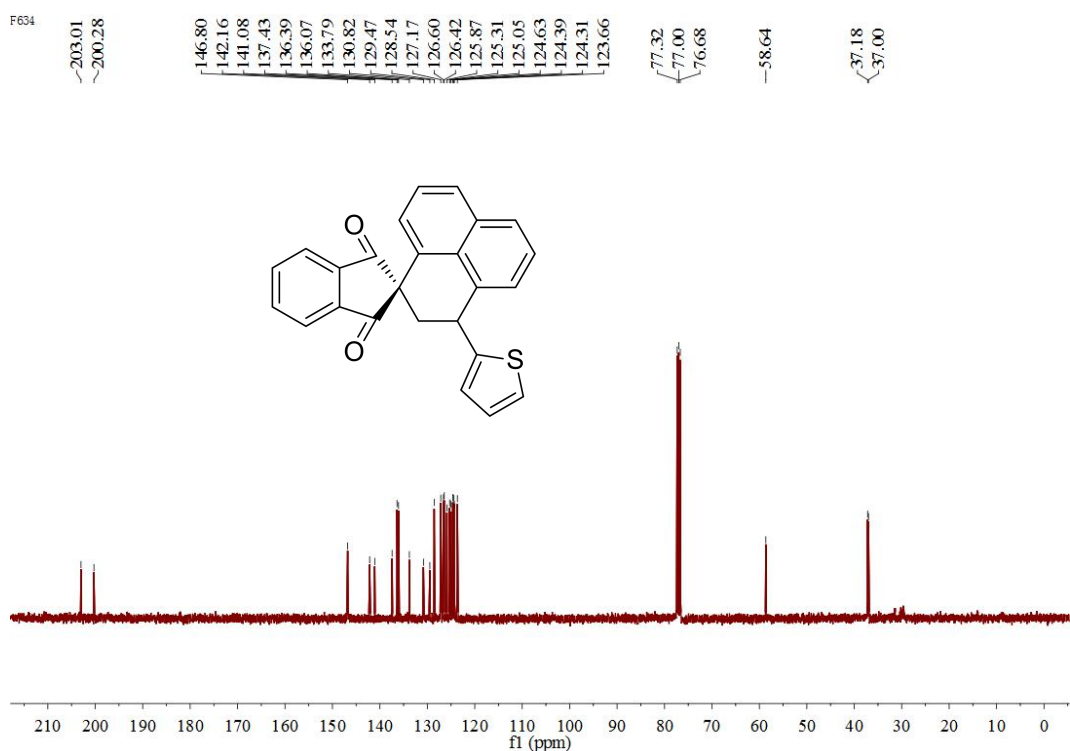

# <sup>1</sup>H NMR and <sup>13</sup>C NMR of 3u

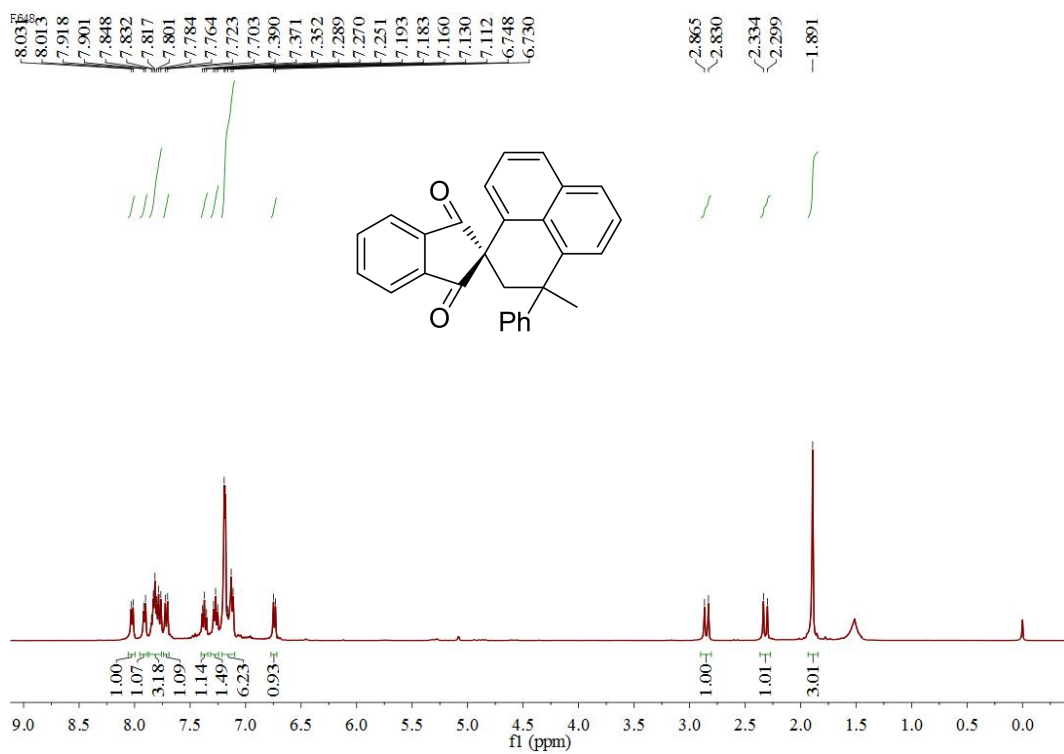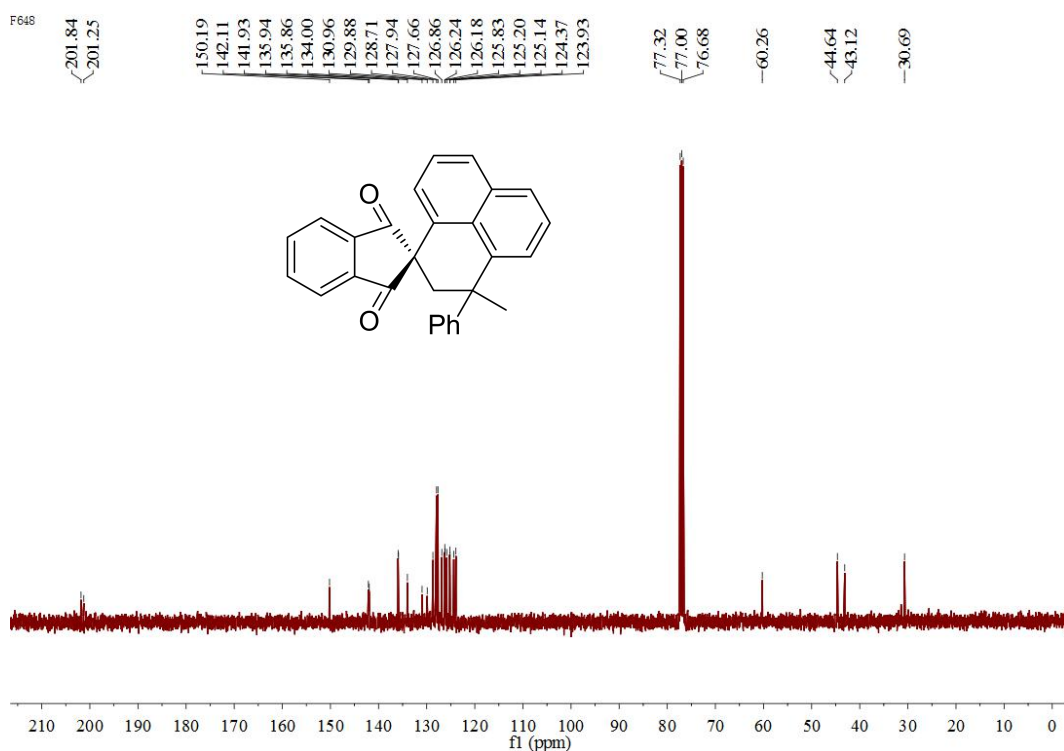



# <sup>1</sup>H NMR, <sup>13</sup>C NMR and <sup>19</sup>F NMR of 3v

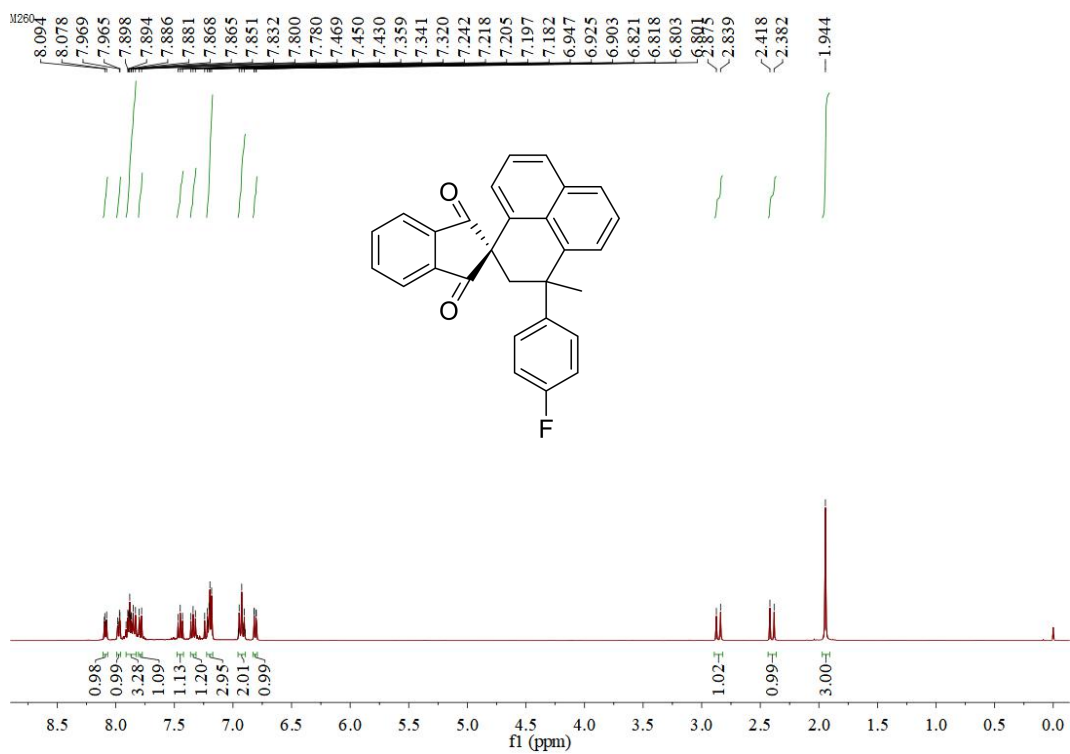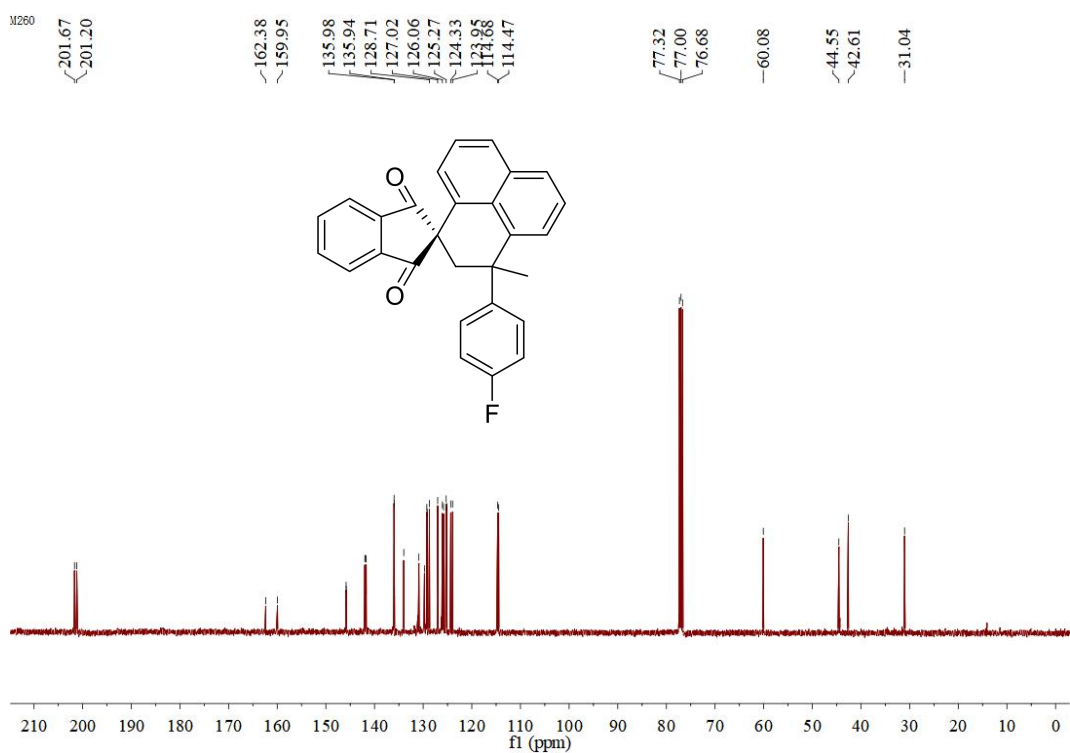

M260

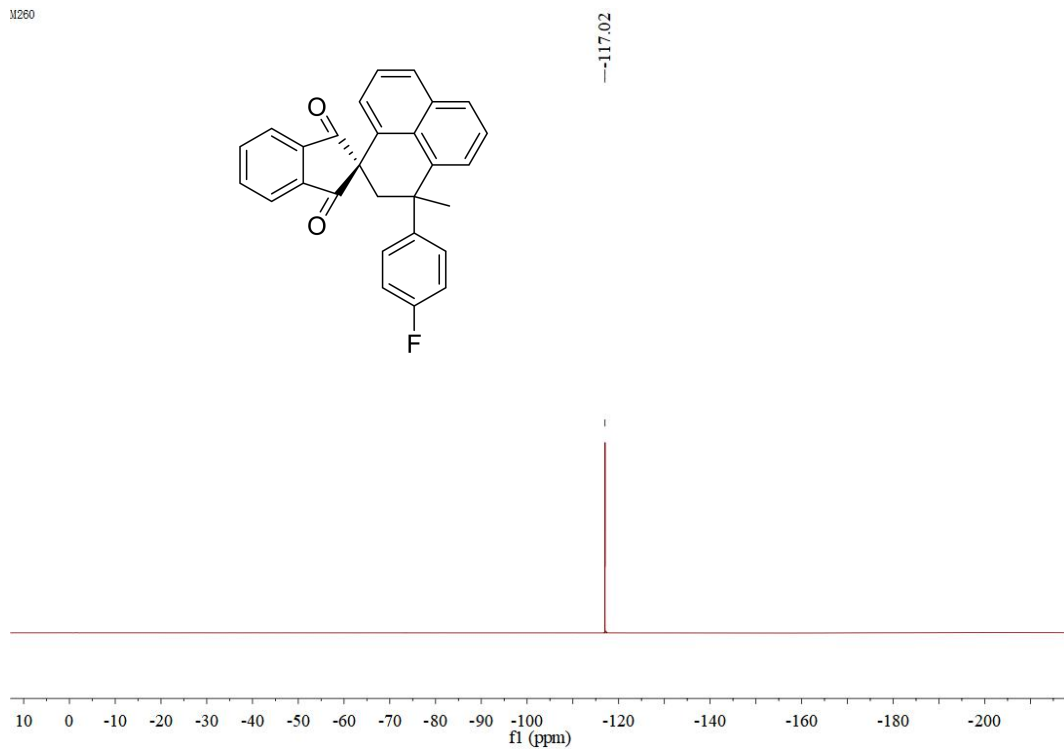

# $^1\text{H}$ NMR and $^{13}\text{C}$ NMR of 3w

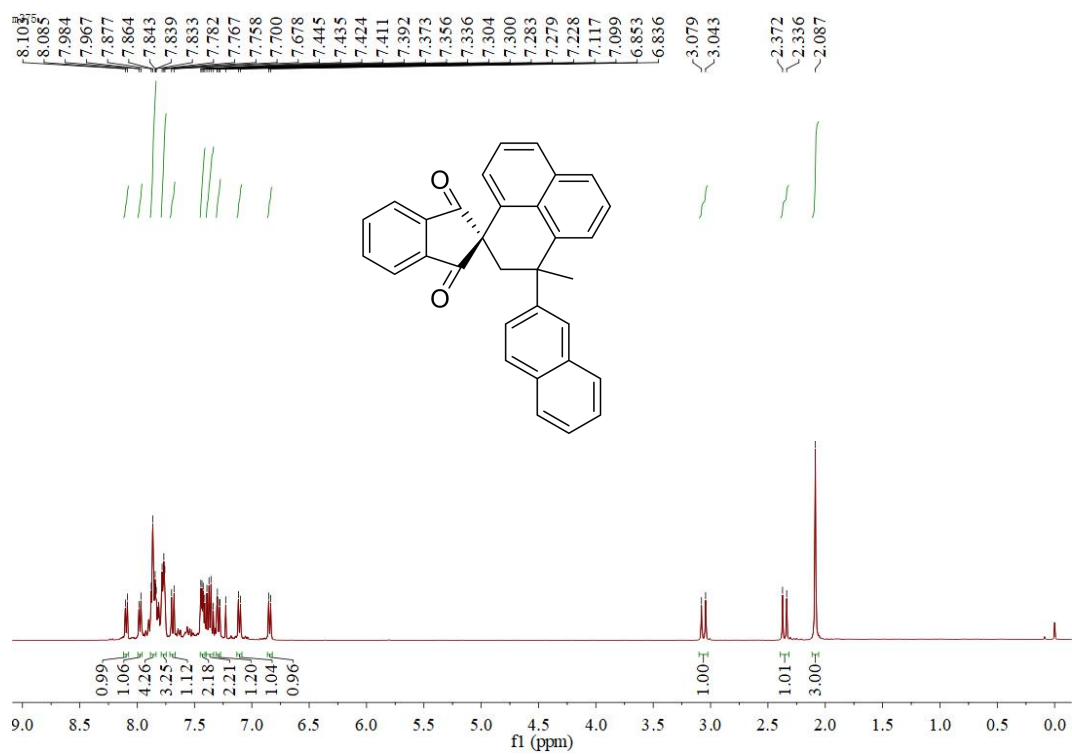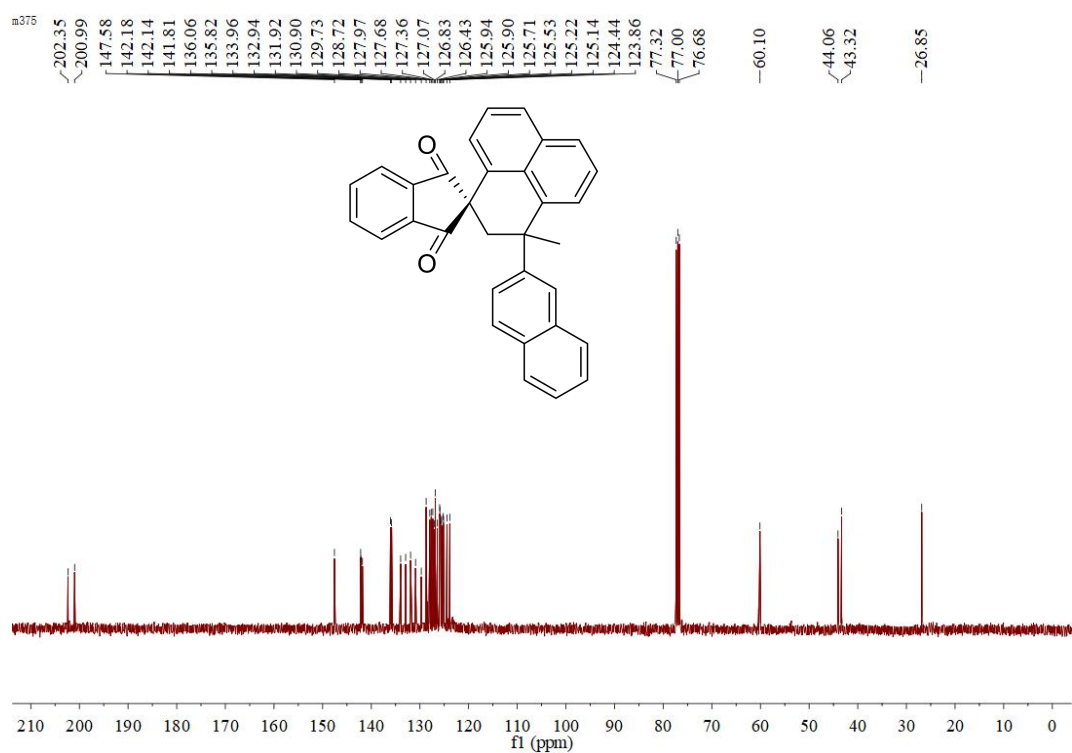

# <sup>1</sup>H NMR and <sup>13</sup>C NMR of 3x

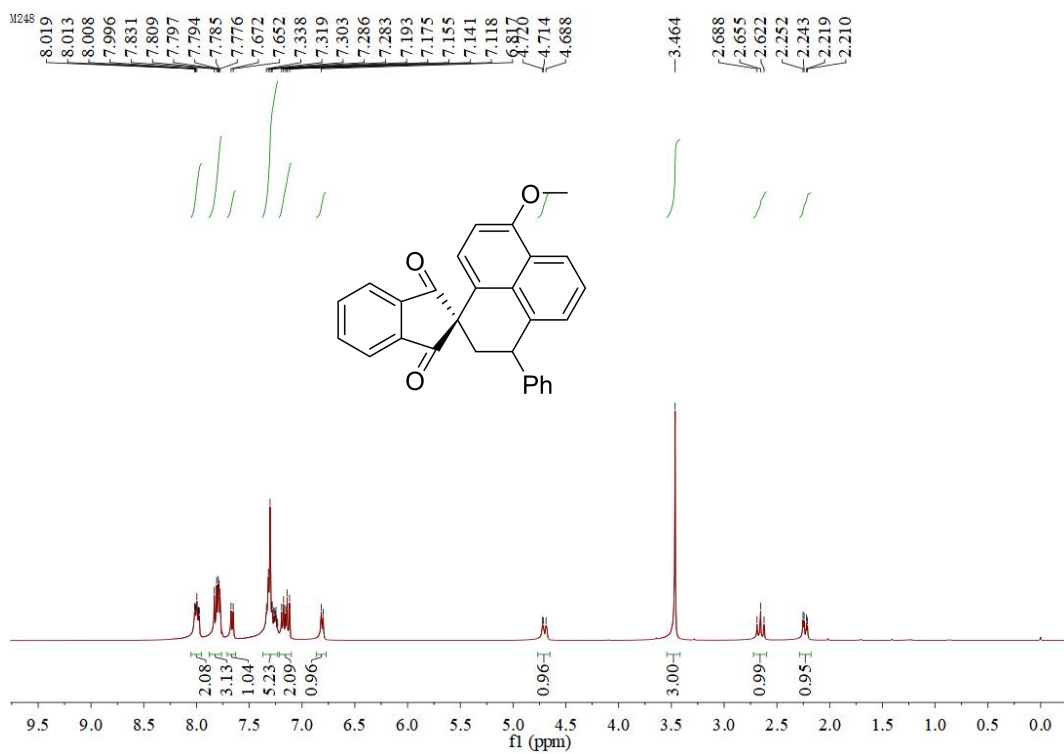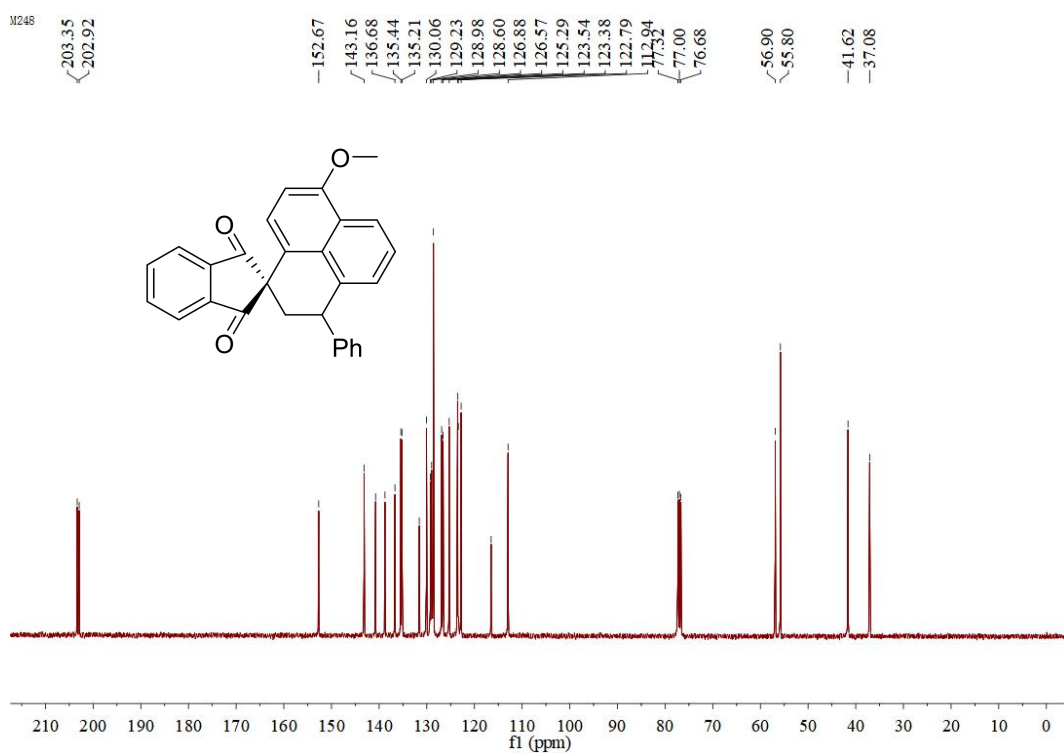

# <sup>1</sup>H NMR and <sup>13</sup>C NMR of 3y

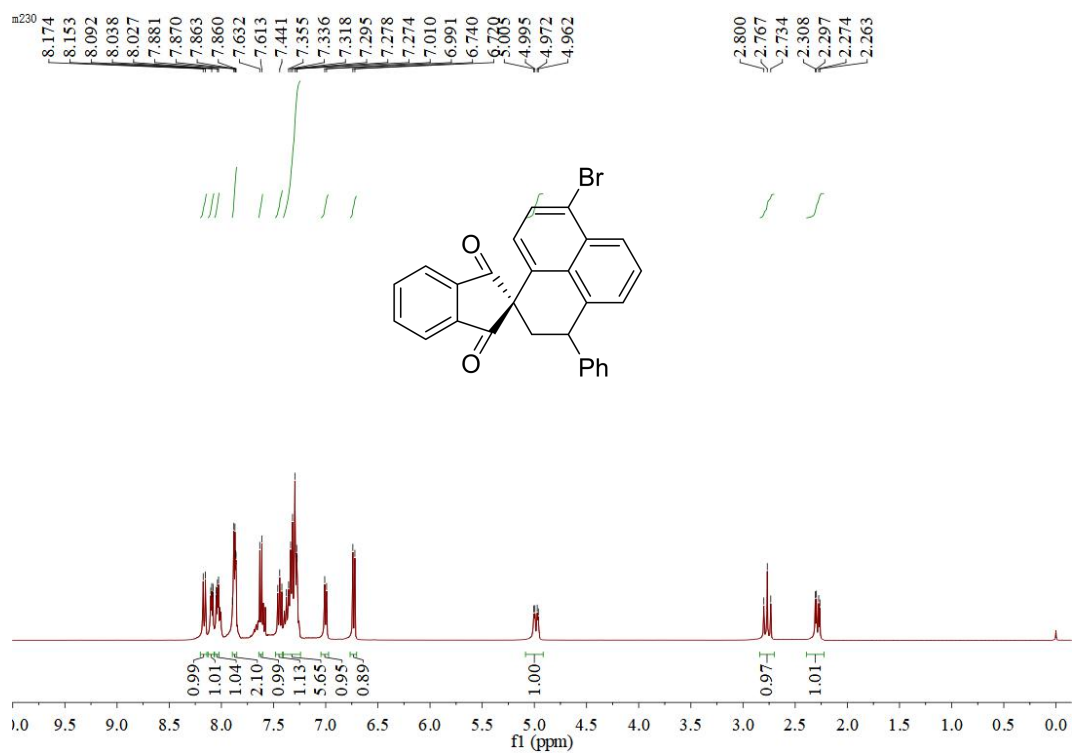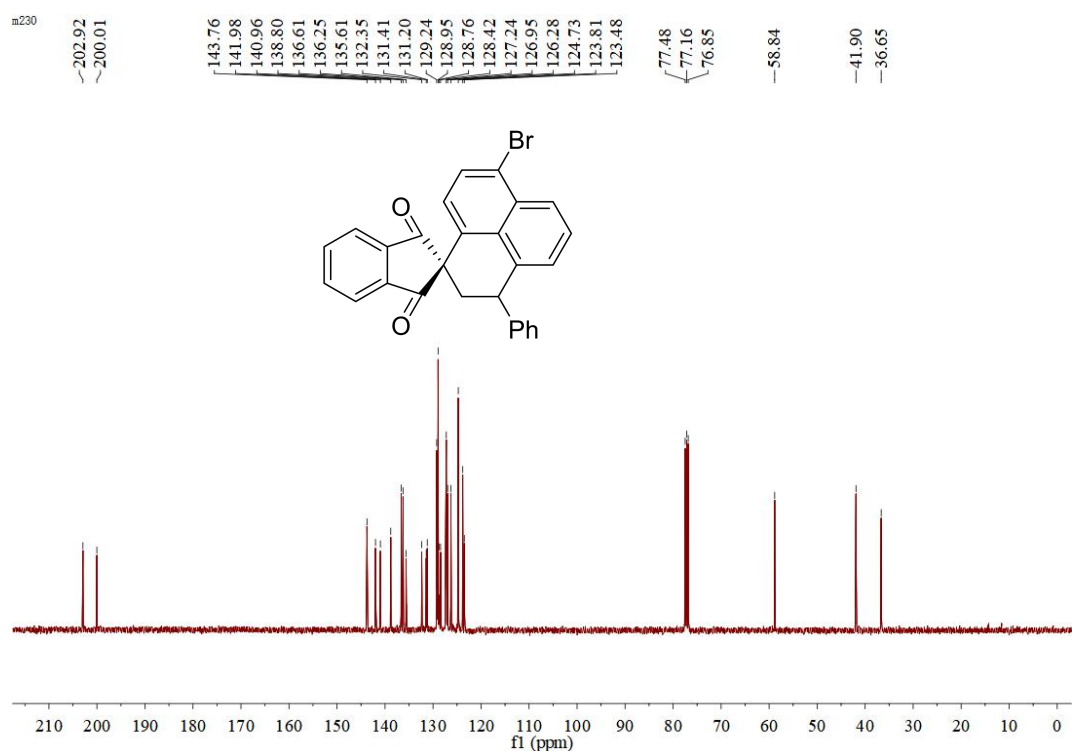

# <sup>1</sup>H NMR and <sup>13</sup>C NMR of 3z

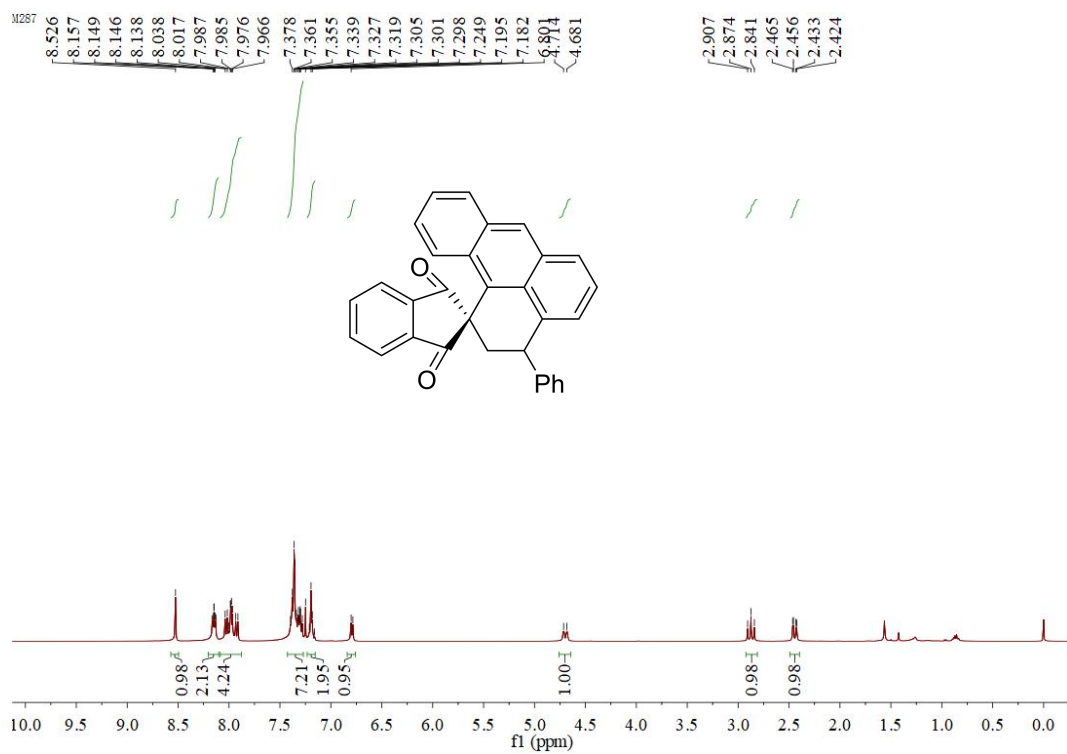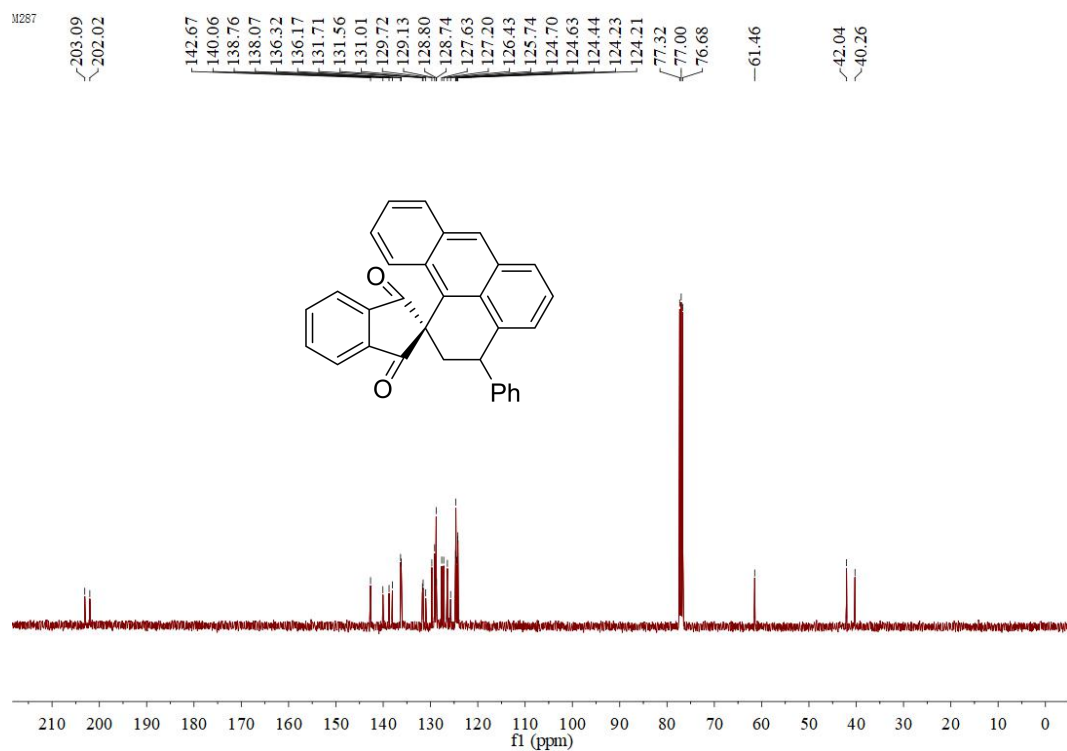

# <sup>1</sup>H NMR and <sup>13</sup>C NMR of 3aa

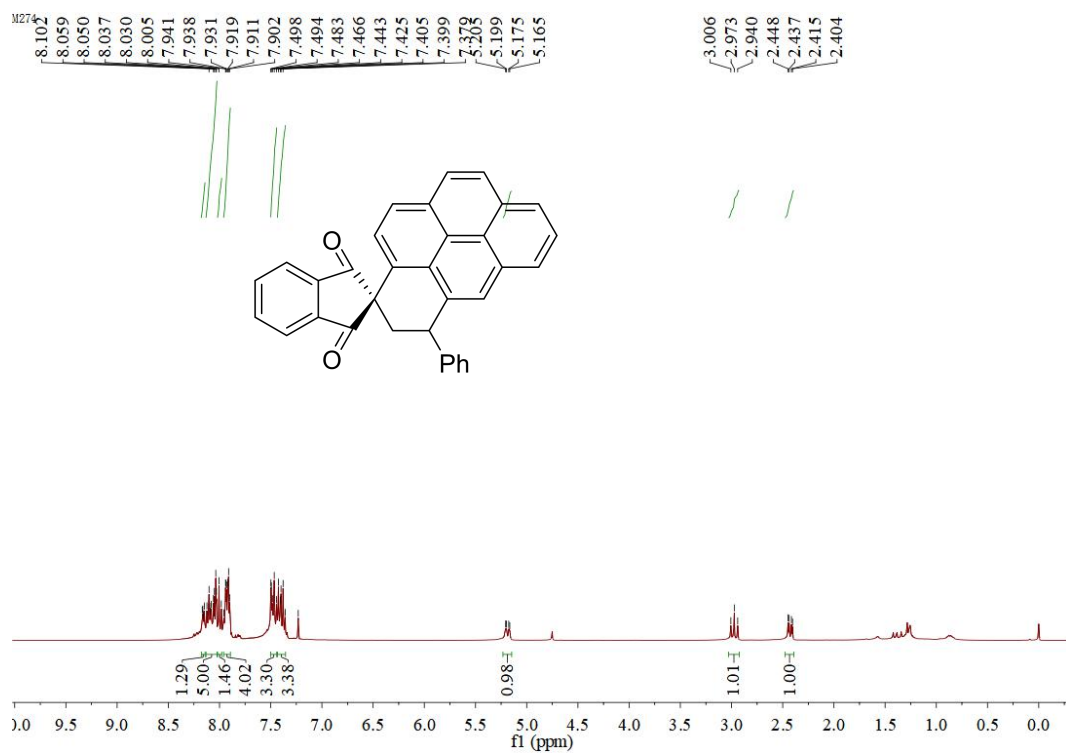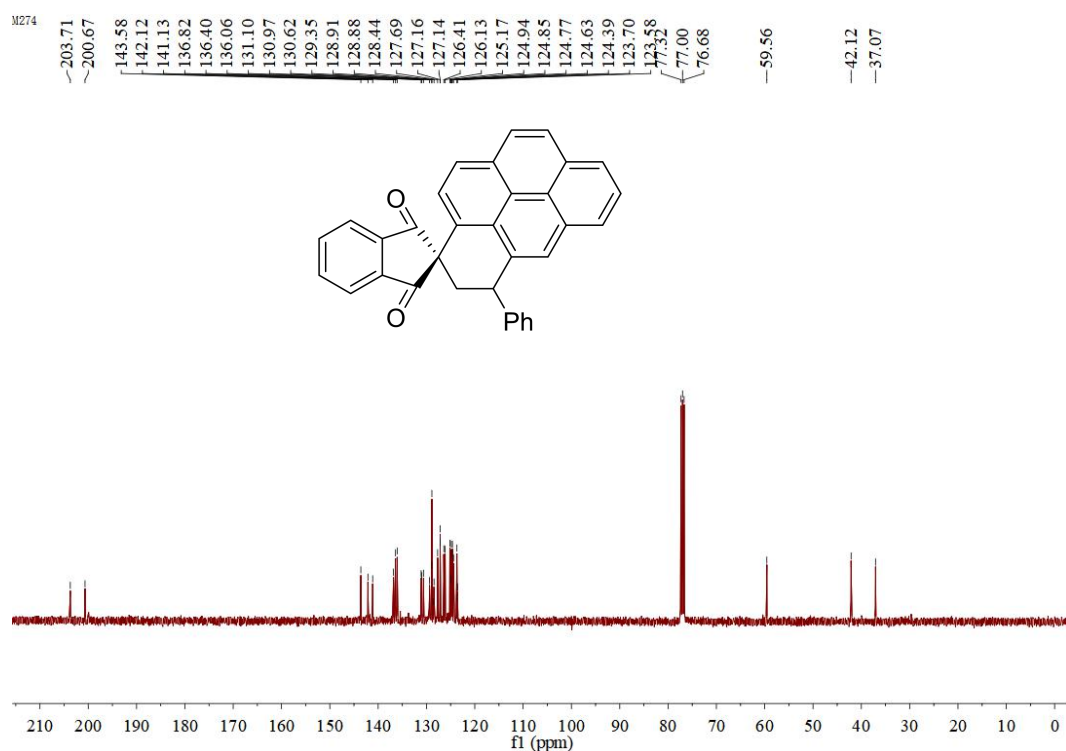

# <sup>1</sup>H NMR and <sup>13</sup>C NMR of 3ab

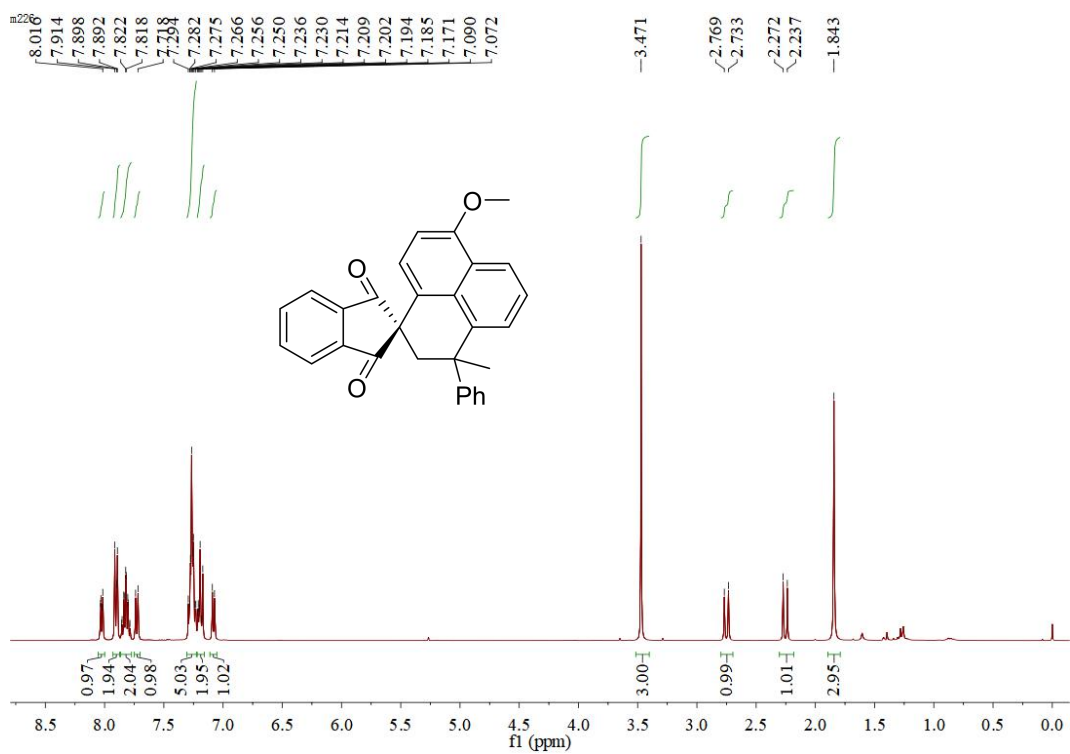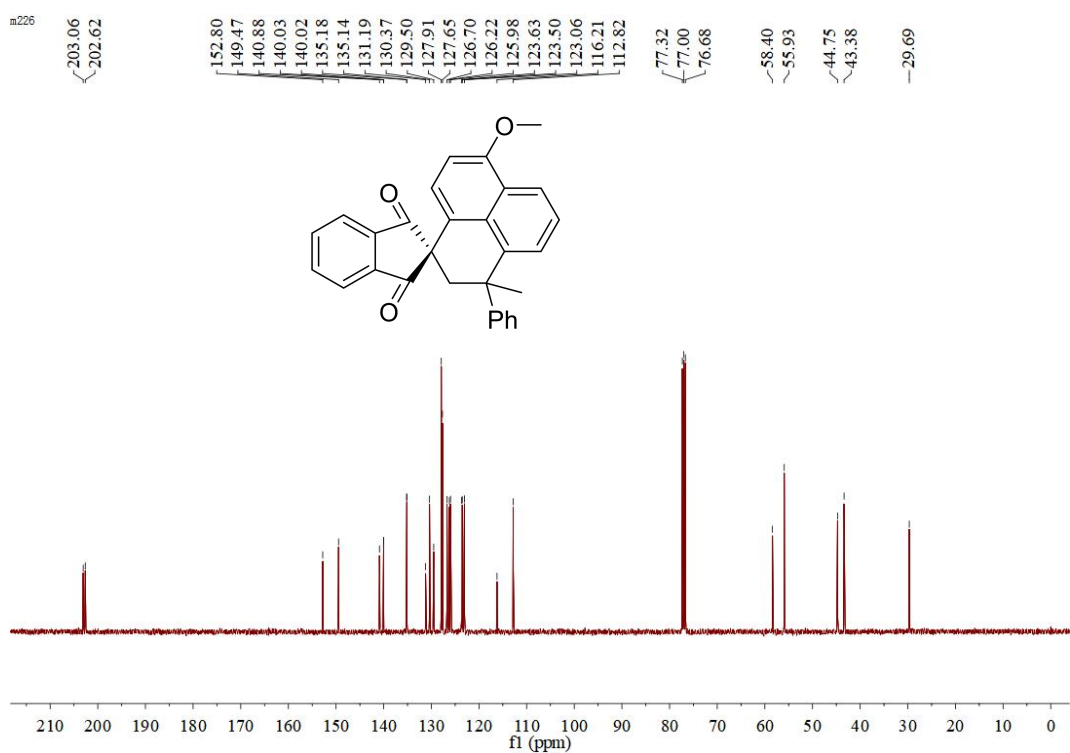



# <sup>1</sup>H NMR and <sup>13</sup>C NMR of 3ac

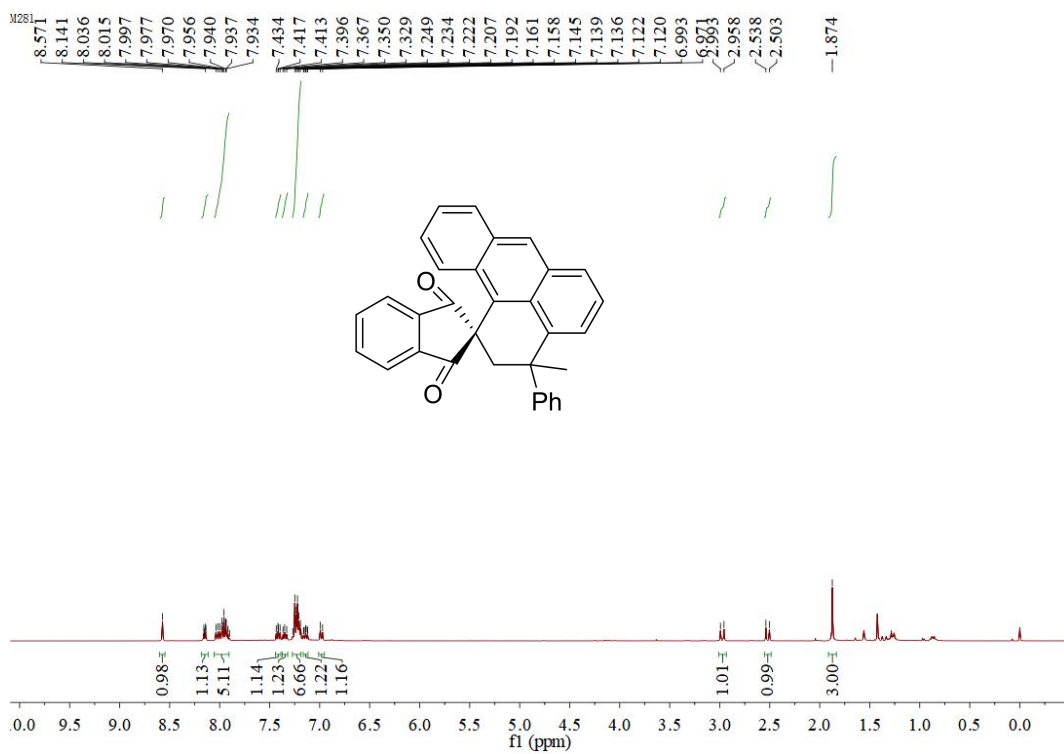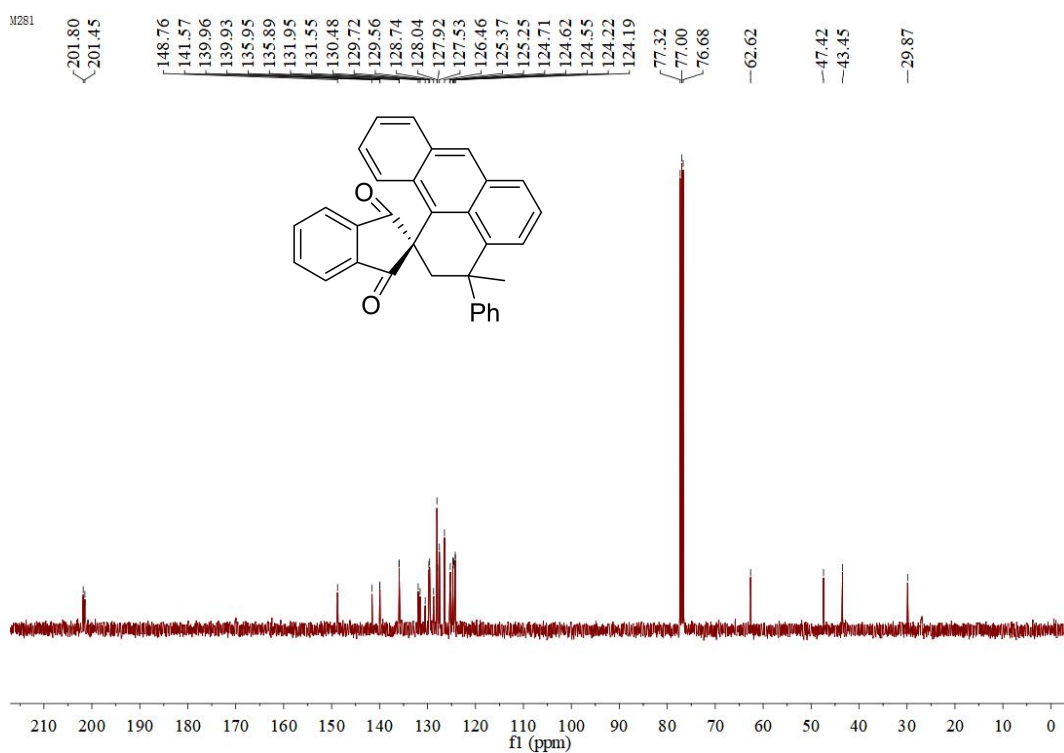

# <sup>1</sup>H NMR and <sup>13</sup>C NMR of 3ad

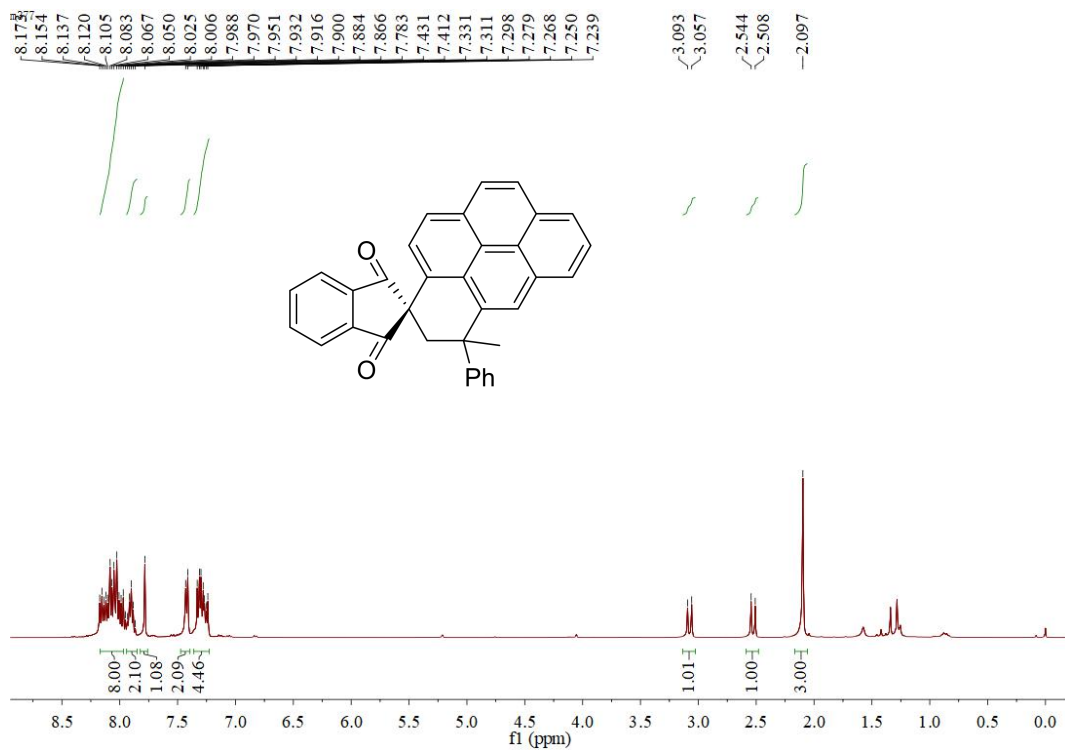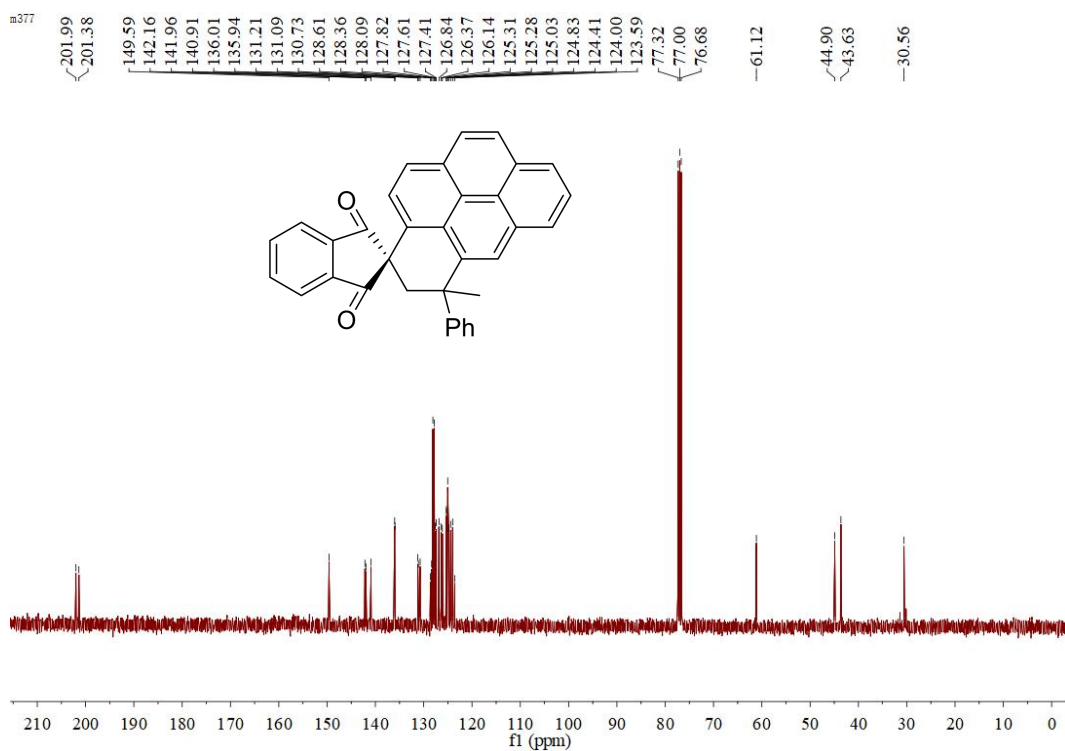

# <sup>1</sup>H NMR and <sup>13</sup>C NMR of 3ae

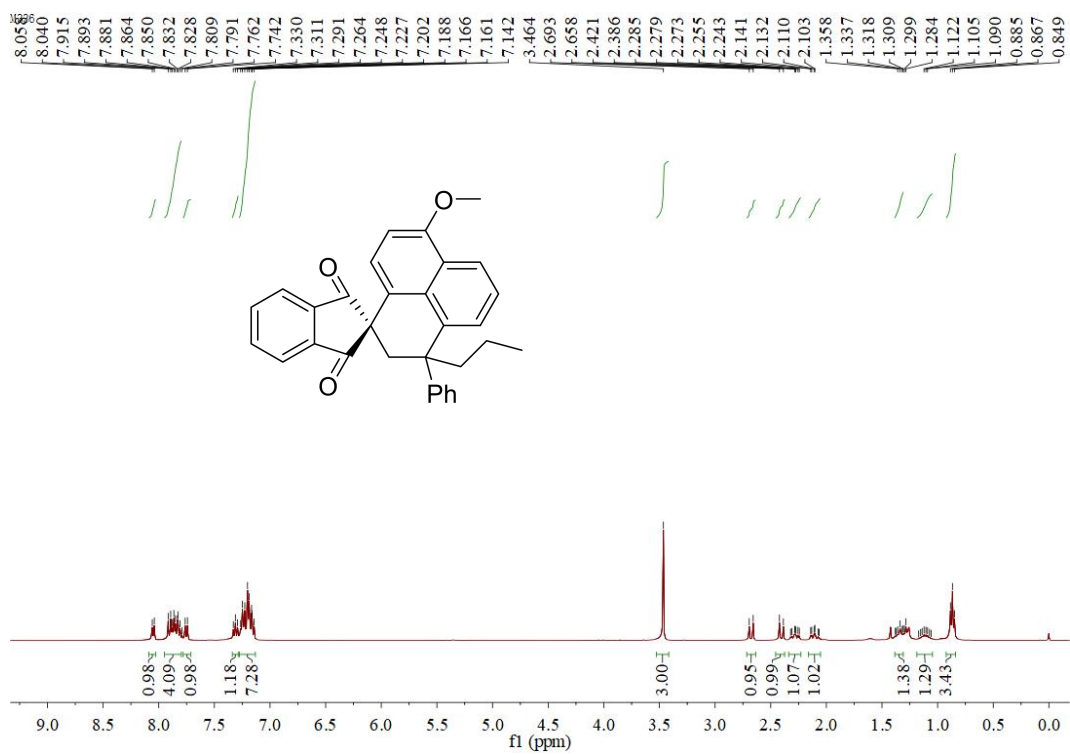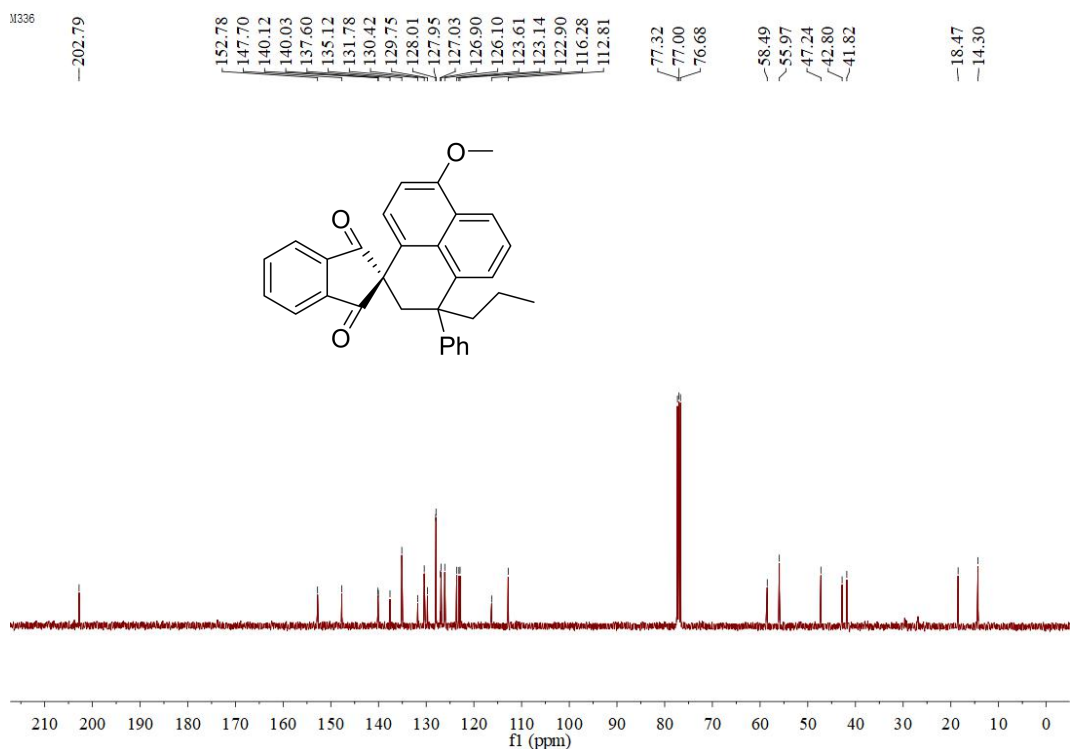

# <sup>1</sup>H NMR and <sup>13</sup>C NMR of 3f

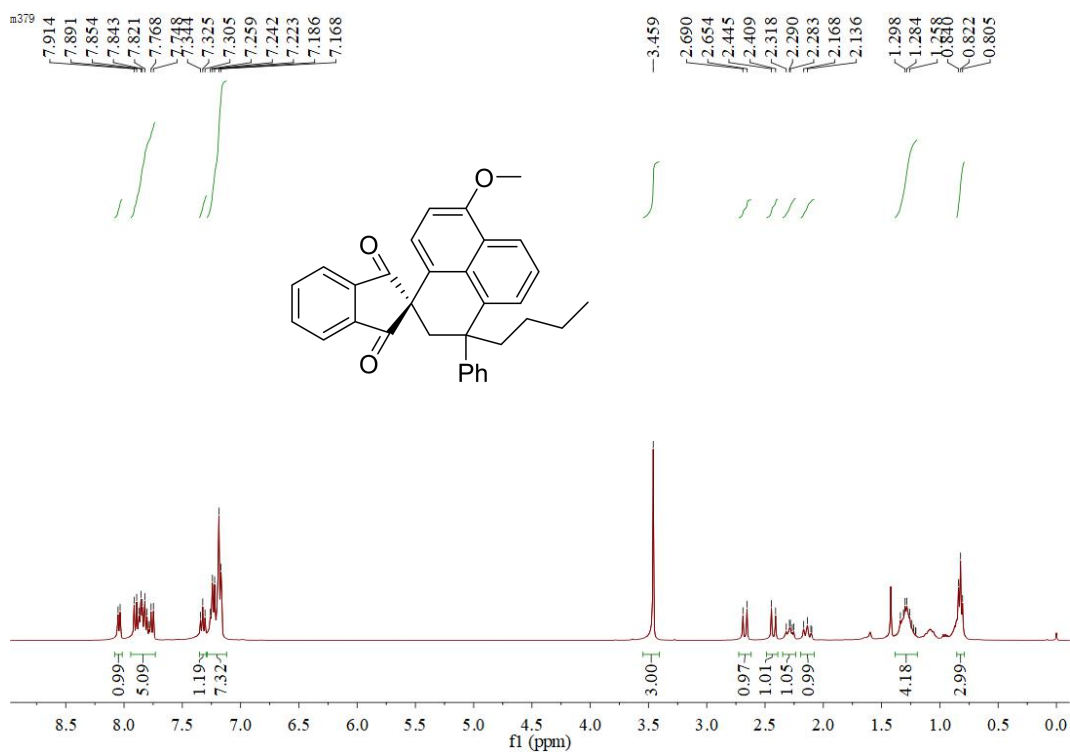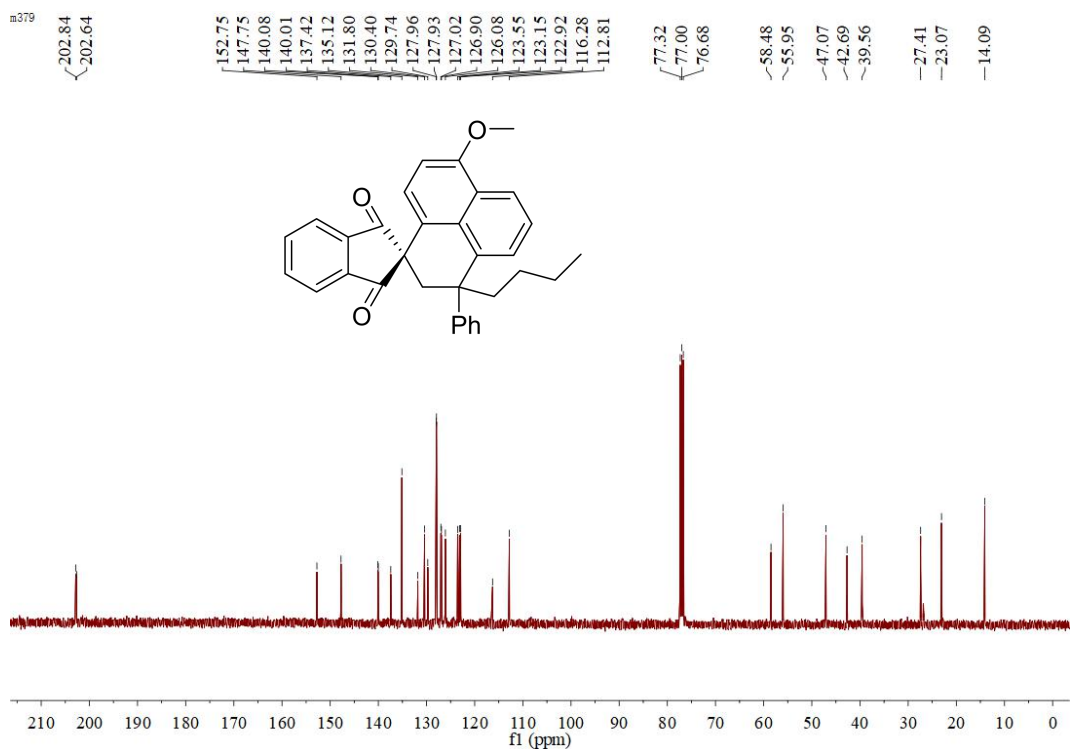

Supplement: d4cc02386b1.pdf [file d4cc02386b1.pdf]
